# Supplementary material for: Access to benzo-fused aza[7]helicene via unexpected indolization of alkyne-amine
Source: Royal Society of Chemistry journal article supplement (doi:10.1039/d1qo00885d), 2021-01-01
Supplement: d1qo00885d1.pdf [file d1qo00885d1.pdf]

## Table of Contents

|                                                                |            |
|----------------------------------------------------------------|------------|
| <b>1. General remarks.....</b>                                 | <b>S2</b>  |
| <b>2. Experimental section.....</b>                            | <b>S2</b>  |
| <b>3. NMR spectra .....</b>                                    | <b>S10</b> |
| <b>4. Fluorescence spectra.....</b>                            | <b>S23</b> |
| <b>5. Fluorescence decay curves.....</b>                       | <b>S32</b> |
| <b>6. UV/vis absorption spectra.....</b>                       | <b>S37</b> |
| <b>7. Lippert–Mataga plots.....</b>                            | <b>S39</b> |
| <b>8. CV spectra.....</b>                                      | <b>S41</b> |
| <b>9. Chiral resolution and CD spectra.....</b>                | <b>S42</b> |
| <b>10. Thermal racemization.....</b>                           | <b>S50</b> |
| <b>11. X-ray crystallographic structure determination.....</b> | <b>S52</b> |
| <b>12. Theoretical calculations.....</b>                       | <b>S56</b> |
| <b>13. References.....</b>                                     | <b>S87</b> |

## 1. General remarks

All reagents and solvents were commercially available and were used without further purification unless otherwise noted. For thin layer chromatography Silica gel 60 F254 plates from Merck were used and examined under UV-light irradiation (254 nm and 365 nm). Flash column chromatography was performed on silica gel (particle size: 200-300 mesh). Melting points were measured with a MPA100 OptiMelt. IR-Spectra were recorded as KBr-pellets on a Bruker VERTEX 80V spectrometer. NMR spectra were taken on Bruker AVANCE III HD (600 MHz) and Bruker AVANCE NEO (400 MHz). Chemical shifts ( $\delta$ ) are reported in parts per million (ppm) relative to traces of  $\text{CHCl}_3$  in the corresponding deuterated solvent. HRMS experiments were carried out on a ThermoFisher LTQ Orbitrap XL. Absorption spectra were recorded on a Shimadzu UV2600. Emission spectra, absolute quantum yields, as well as fluorescence lifetimes were measured on FluoroMax-4 spectrometer equipped with an integral sphere and a time-correlated single photon counting system with a NanoLED laser. The chiral resolutions of aza[7]helicenes were performed on a Shimadzu LC-20AD equipped with a chiral column (Chiralpak IE-3). Circular Dichromism spectra were recorded on a Bio-Logic MOS-500. Crystal structure analysis was accomplished with a SuperNova, Dual, Cu at zero, AtlasS2 diffractometer. Cyclic voltammograms were obtained using a glassy carbon working electrode, a platinum counter electrode, and a Ag reference electrode tested on CHI660E station. The mean-plane-deviation (MPD) values are average deviations of the core atoms from their mean-planes. The mean planes are defined by core carbon and nitrogen atoms (33 atoms for **2**, 34 atoms for **3** and 38 atoms for **4**). Acridone was synthesized according to the reported method.<sup>[S1]</sup>

## 2. Experimental section

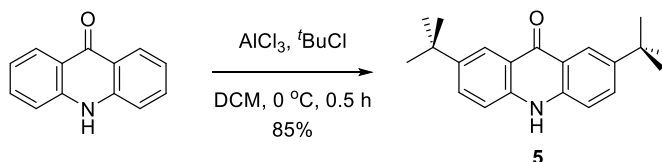

**2,7-di-tert-butylacridone (5)**. The synthesis of acridone was carried out by a modified method.<sup>[S2]</sup> A 250 mL two-necked flask was charged with the powder of acridone (2.93 g, 15 mmol) and anhydrous dichloromethane (75 mL) under the protection of argon. The flask was cooled in an ice-bath and aluminum trichloride (4.00 g, 30 mmol) was added to the flask.  $t\text{BuCl}$  (7.25 mL) was added dropwise to the suspension and the mixture was stirred at  $0\text{ }^\circ\text{C}$  for 0.5 h. The reaction mixture was quenched with water and diluted with dichloromethane (500 mL), then washed with water and dried over  $\text{Na}_2\text{SO}_4$ . The solvent was removed by rotatory evaporation and the crude product was purified by silica gel column chromatography (dichloromethane) to give the product **5** as yellow solid (3.92 g, 85%).  $^1\text{H}$  NMR (600 MHz,  $\text{CDCl}_3$ )  $\delta$  (ppm) = 8.86 (br s, 1H), 8.49 (d,  $J = 2.3\text{ Hz}$ , 2H), 7.72 (dd,  $J = 8.7, 2.3\text{ Hz}$ , 2H), 7.36 (d,  $J = 8.7\text{ Hz}$ , 2H), 1.38 (s, 18H). Analytical data are in agreement with those published before.<sup>[S2]</sup>

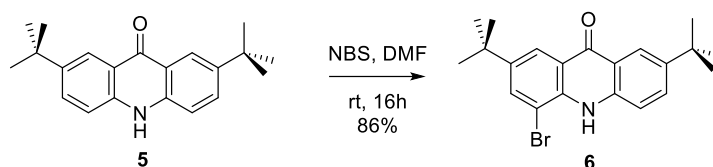

**4-bromo-2,7-di-tert-butylacridone (6).** Acridone **5** (922 mg, 3 mmol), *N*-bromosuccinimide (588 mg, 3.3 mmol) and DMF (15 mL) were stirred at room temperature for 16 h. The reaction mixture was quenched with water and diluted with dichloromethane (200 mL), then washed with water (5×200 mL) and dried over Na<sub>2</sub>SO<sub>4</sub>. The solvent was removed by rotatory evaporation and the crude product was purified by silica gel column chromatography (dichloromethane) to give compound **6** as yellow solid (1.01 g, 86%). m.p. 206-209 °C. <sup>1</sup>H NMR (600 MHz, CDCl<sub>3</sub>) δ (ppm) = 8.46 (d, *J* = 2.1 Hz, 1H), 8.45 (d, *J* = 2.3 Hz, 1H), 8.40 (br s, 1H), 7.94 (d, *J* = 2.1 Hz, 1H), 7.77 (dd, *J* = 8.7, 2.3 Hz, 1H), 7.36 (d, *J* = 8.6 Hz, 1H), 1.41 (s, 9H), 1.40 (s, 9H). <sup>13</sup>CNMR (150 MHz, CDCl<sub>3</sub>) δ (ppm) = 178.2, 145.5, 145.5, 138.1, 135.8, 134.4, 132.2, 123.1, 123.0, 122.3, 120.7, 116.7, 110.4, 35.0, 34.9, 31.5, 31.5. IR (KBr)  $\tilde{\nu}$  (cm<sup>-1</sup>) = 3409, 3278, 2962, 2863, 1627, 1587, 1508, 1363, 1261, 1153, 894, 835, 647. HRMS(ESI) (*m/z*) : [M+K]<sup>+</sup> calcd. for C<sub>21</sub>H<sub>24</sub>NOBrK, 424.0673; found, 424.0694.

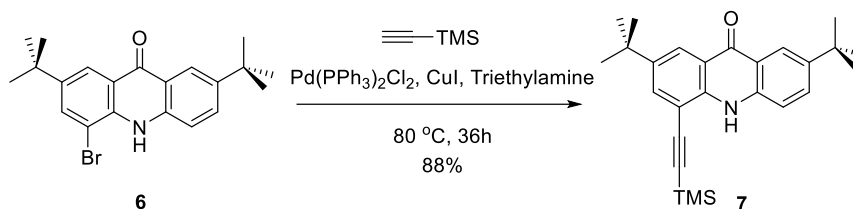

**2,7-di-tert-butyl-4-trimethylsilylethynylacridone (7).** A 120 mL screw capped glass vial was charged with **6** (733 mg, 2 mmol), CuI (4 mg, 0.02 mmol) and Pd(PPh<sub>3</sub>)<sub>2</sub>Cl<sub>2</sub> (30 mg, 0.04 mmol). Anhydrous triethylamine (10 mL) was added to the vial and the mixture was bubbled with argon for 3 minutes, followed by adding trimethylsilylacetylene (393 mg, 4 mmol). The vial was quickly sealed and heated at 80 °C for 36 hours. After cooling down to room temperature, the reaction mixture was diluted with dichloromethane (250 mL) and washed with water (200 mL) and dried over Na<sub>2</sub>SO<sub>4</sub>. The solvent was removed by rotatory evaporation and the crude product was purified by silica gel column chromatography (dichloromethane) to give the product **7** as light yellow solid (710 mg, 88%). m.p. 240-242 °C. <sup>1</sup>H NMR (600 MHz, CDCl<sub>3</sub>) δ (ppm) = 8.52 (br s, 1H), 8.46 (d, *J* = 2.3 Hz, 1H), 8.45 (d, *J* = 2.2 Hz, 1H), 7.86 (d, *J* = 2.3 Hz, 1H), 7.75 (dd, *J* = 8.6, 2.3 Hz, 1H), 7.27-7.25 (m, 1H), 1.41 (s, 9H), 1.40 (s, 9H), 0.39 (s, 9H). <sup>13</sup>CNMR (150 MHz, CDCl<sub>3</sub>) δ (ppm) = 178.52, 145.22, 143.94, 138.82, 137.92, 134.36, 131.94, 124.36, 123.00, 121.14, 120.79, 116.52, 110.08, 103.02, 99.86, 34.88, 34.83, 31.54, 31.49, 0.22. IR (KBr)  $\tilde{\nu}$  (cm<sup>-1</sup>) = 3401, 3264, 3181, 2962, 2871, 2154, 1627, 1581, 1504, 1459, 1315, 1261, 1172, 842, 761, 651. HRMS(ESI) (*m/z*) : [M+H]<sup>+</sup> calcd. for C<sub>23</sub>H<sub>33</sub>NOSi, 404.2404; found, 404.2424.

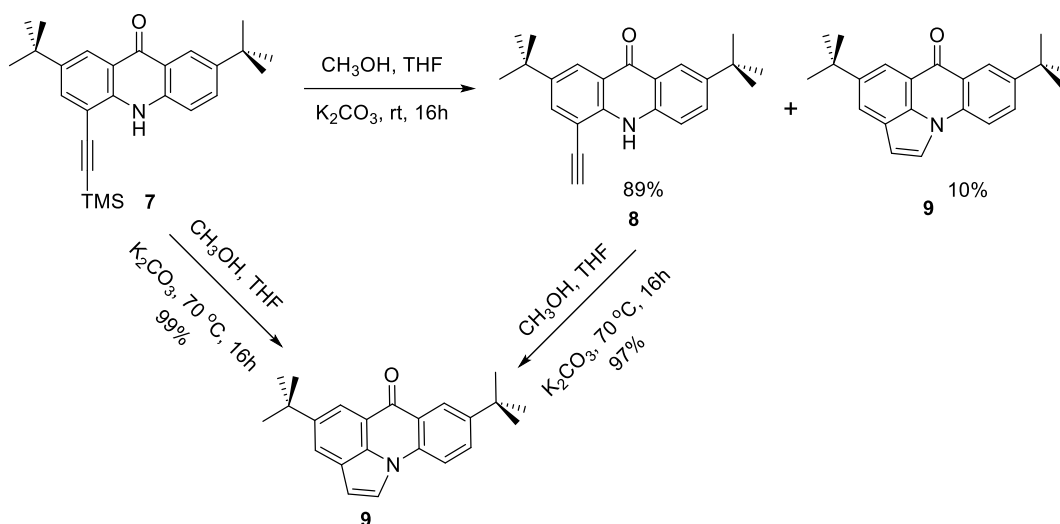

**2,7-di-tert-butyl-4-ethynylacridone (8) and quinolone-fused indole (9).** Compound **7** (2.26 g, 5.6 mmol),  $K_2CO_3$  (3.10 g, 22.4 mmol), methanol (20 mL) and tetrahydrofuran (20 mL) was stirred at room temperature for 16 h. The reaction mixture was quenched with water and diluted with dichloromethane (200 mL), then washed with water (3×200 mL) and dried over  $Na_2SO_4$ . The solvent was removed by rotatory evaporation and the crude product was purified by silica gel column chromatography (dichloromethane) to give compound **8** (1.66 g, 89%) and **9** (181 mg, 10%) as yellow solids. Compound **8**: m.p. 130-132 °C.  $^1H$  NMR (600 MHz,  $CDCl_3$ )  $\delta$  (ppm) = 8.60 (br s, 1H), 8.50 (d,  $J$  = 2.3 Hz, 1H), 8.45 (d,  $J$  = 2.2 Hz, 1H), 7.90 (d,  $J$  = 2.3 Hz, 1H), 7.74 (dd,  $J$  = 8.7, 2.3 Hz, 1H), 7.34 (d,  $J$  = 8.6 Hz, 1H), 3.66 (s, 1H), 1.40 (s, 9H), 1.39 (s, 9H).  $^{13}C$  NMR (150 MHz,  $CDCl_3$ )  $\delta$  (ppm) = 178.4, 145.3, 143.9, 139.1, 138.1, 135.0, 132.0, 124.7, 122.9, 121.1, 120.9, 116.6, 108.9, 85.0, 79.0, 34.9, 34.8, 31.5, 31.4. IR (KBr)  $\tilde{\nu}$  ( $cm^{-1}$ ) = 3409, 3295, 2962, 2900, 2863, 1627, 1581, 1513, 1448, 1365, 1261, 1176, 896, 825, 603. HRMS(ESI) ( $m/z$ ):  $[M+K]^+$  calcd. for  $C_{23}H_{25}NOK$ , 370.1568; found, 370.1585.

Compound **9**: m.p. 186-188 °C.  $^1H$  NMR (600 MHz,  $CDCl_3$ )  $\delta$  (ppm) = 8.56 (d,  $J$  = 2.3 Hz, 1H), 8.39 (d,  $J$  = 1.5 Hz, 1H), 8.10 (d,  $J$  = 1.6 Hz, 1H), 7.88 (d,  $J$  = 3.4 Hz, 1H), 7.81 (dd,  $J$  = 8.6, 2.3 Hz, 1H), 7.70 (d,  $J$  = 8.6 Hz, 1H), 6.90 (d,  $J$  = 3.4 Hz, 1H), 1.49 (s, 9H), 1.44 (s, 9H).  $^{13}C$  NMR (150 MHz,  $CDCl_3$ )  $\delta$  (ppm) = 179.9, 146.9, 146.9, 135.8, 133.1, 131.6, 128.9, 125.0, 124.8, 124.6, 122.7, 119.7, 119.0, 114.1, 108.1, 35.5, 35.0, 32.2, 31.5. IR (KBr)  $\tilde{\nu}$  ( $cm^{-1}$ ) = 2954, 2903, 2865, 1647, 1628, 1605, 1566, 1517, 1498, 1360, 1327, 1284, 1246, 1218, 1168, 1103, 886, 810, 719. HRMS(ESI) ( $m/z$ ):  $[M+H]^+$  calcd. for  $C_{23}H_{26}$ , 332.2009; found, 332.2007.

Synthesis of **9** from **7**: The mixture of **7**,  $K_2CO_3$  (83 mg, 0.6 mmol), methanol (0.6 mL), tetrahydrofuran (0.6 mL) was stirred at 70 °C for 16 h. After cooling down to room temperature, the reaction mixture was diluted with dichloromethane (100 mL) and washed with water (100 mL). The solvent was removed by rotatory evaporation and the crude product was purified by silica gel column chromatography (dichloromethane) to give product **9** as yellow solid (50 mg, 99%).

Synthesis of **9** from **8**: The mixture of **8** (33 mg, 0.1 mmol),  $K_2CO_3$  (55 mg, 0.4 mmol), methanol (0.4 mL) and tetrahydrofuran (0.4 mL) was stirred at 70 °C for 16 h. After cooling down to room temperature, the reaction mixture was diluted with dichloromethane (100 mL) and washed with water (100 mL). The solvent was removed by rotatory evaporation and the crude product was purified by silica gel column chromatography (dichloromethane) to give product **9** as yellow solid (32 mg, 97%).

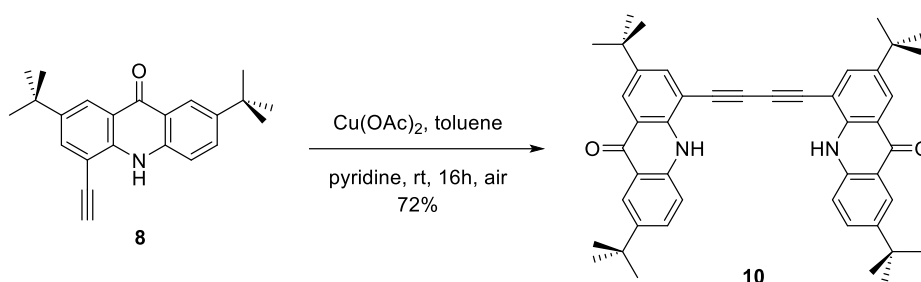

**4,4'-(buta-1,3-diyne-1,4-diyl)bis(2,7-di-*tert*-butylacridone) (10).** The mixture of **8** (994 mg, 3 mmol) and Cu(OAc)<sub>2</sub> (5.45 g, 30 mmol) in toluene (120 mL) and pyridine (12 mL) was stirred in air at room temperature for 16 h. The reaction mixture was washed with water (5x200 mL) and dried over Na<sub>2</sub>SO<sub>4</sub>. The solvent was removed by rotatory evaporation and the crude product was purified by silica gel column chromatography (dichloromethane / ethyl acetate 100:1) to give the product **10** as yellow solid (720 mg, 72%). m.p. 390 °C (dec.). <sup>1</sup>H NMR (600 MHz, CDCl<sub>3</sub>) δ (ppm) = 9.04 (br s, 2H), 8.61 (d, *J* = 2.3 Hz, 2H), 8.50 (d, *J* = 2.2 Hz, 2H), 7.86 (d, *J* = 2.3 Hz, 2H), 7.72 (dd, *J* = 8.7, 2.3 Hz, 2H), 7.46 (d, *J* = 8.7 Hz, 2H), 1.43 (s, 18H), 1.39 (s, 18H). <sup>13</sup>CNMR (150 MHz, CDCl<sub>3</sub>) δ (ppm) = 178.4, 145.6, 144.2, 139.9, 138.2, 136.0, 132.2, 126.0, 123.0, 121.3, 121.1, 116.8, 108.3, 80.7, 79.1, 34.9, 34.9, 31.5, 31.5. IR (KBr)  $\tilde{\nu}$  (cm<sup>-1</sup>) = 3417, 3251, 3151, 2954, 2861, 1583, 1509, 1446, 1317, 1266, 1172, 914, 831, 748. HRMS(ESI) (*m/z*) : [M+H]<sup>+</sup> calcd. for C<sub>46</sub>H<sub>49</sub>N<sub>2</sub>O<sub>2</sub>, 661.3789; found, 661.3774.

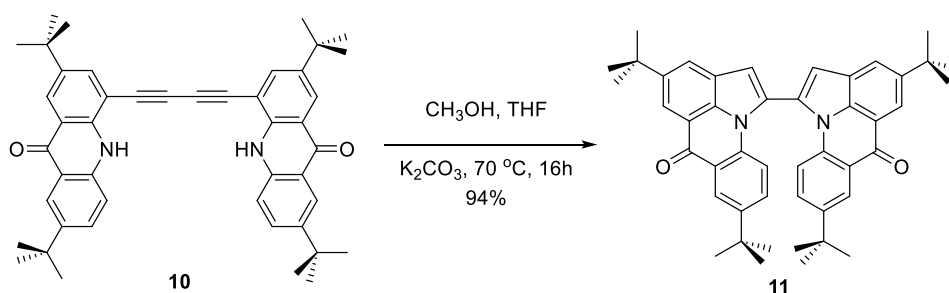

**4,4',8,8'-tetra-*tert*-butyl-[1,1'-bipyrrolo[3,2,1-de]acridone-6,6'-dione (11).** A 120 mL screw capped glass vial was charged with **10** (660 mg, 1 mmol), K<sub>2</sub>CO<sub>3</sub> (550 mg, 4 mmol), methanol (4 mL) and tetrahydrofuran (4 mL). The vial was sealed and heated in an oil-bath at 70 °C for 16 hours. After cooling down to room temperature, the reaction mixture was diluted with dichloromethane (250 mL), then washed with water (3x200 mL) and dried over Na<sub>2</sub>SO<sub>4</sub>. The solvent was removed by rotatory evaporation and the crude product was purified by silica gel column chromatography (dichloromethane / petroleum ether 1:1) to give the dimer **11** as yellow solid (624 mg, 94%). m.p. 355-358 °C. <sup>1</sup>H NMR (400 MHz, CDCl<sub>3</sub>) δ (ppm) = 8.56 (d, *J* = 1.7 Hz, 2H), 8.54 (d, *J* = 2.5 Hz, 2H), 8.20 (d, *J* = 1.7 Hz, 2H), 7.27 - 7.24 (m, 2H), 7.15 (s, 2H), 6.84 (d, *J* = 8.9 Hz, 2H), 1.56 (s, 18H), 1.26 (s, 18H). <sup>13</sup>CNMR (100 MHz, CDCl<sub>3</sub>) δ (ppm) = 179.7, 147.7, 147.2, 136.5, 134.4, 132.1, 129.9, 127.6, 125.2, 124.9, 121.2, 119.7, 114.5, 113.5, 35.6, 34.8, 32.2, 31.3. IR (KBr)  $\tilde{\nu}$  (cm<sup>-1</sup>) = 3116, 2956, 2913, 2873, 1656, 1606, 1565, 1481, 1359, 1311, 1276, 1249, 1199, 1147, 894, 825, 601. HRMS(ESI) (*m/z*) : [M+H]<sup>+</sup> calcd. for C<sub>46</sub>H<sub>49</sub>N<sub>2</sub>O<sub>2</sub>, 661.3788; found, 661.3789.

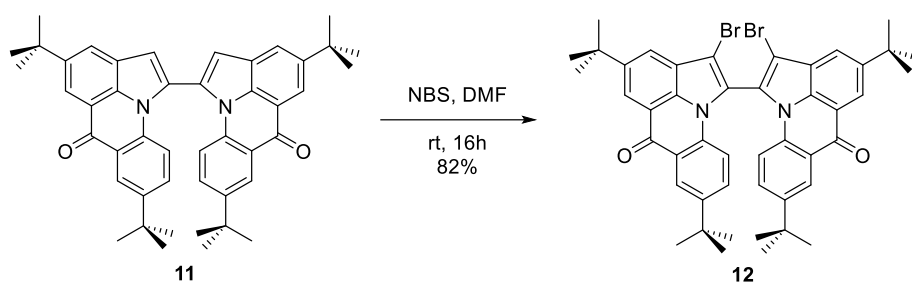

**2,2'-dibromo-4,4',8,8'-tetra-*tert*-butyl-[1,1'-bipyrrolo[3,2,1-de]acridone-6,6'-dione (12).** The mixture of **11** (390 mg, 0.59 mmol), *N*-bromosuccinimide (221 mg, 1.24 mmol) and DMF (6 mL) was stirred at room temperature for 16 h. The reaction mixture was quenched with water and diluted with dichloromethane (100 mL), then washed with water (3×100 mL) and dried over Na<sub>2</sub>SO<sub>4</sub>. The solvent was removed by rotatory evaporation and the crude product was purified by silica gel column chromatography (dichloromethane) to give the product **12** as yellow solid (396 mg, 82%). m.p. 327-329 °C. <sup>1</sup>H NMR (400 MHz, CDCl<sub>3</sub>) δ (ppm) = 8.63 (d, *J* = 1.6 Hz, 2H), 8.55 (d, *J* = 2.4 Hz, 2H), 8.16 (d, *J* = 1.6 Hz, 2H), 7.33 (dd, *J* = 8.9, 2.4 Hz, 2H), 6.88 (d, *J* = 8.9 Hz, 2H), 1.59 (s, 18H), 1.28 (s, 18H). <sup>13</sup>CNMR (100 MHz, CDCl<sub>3</sub>) δ (ppm) = 179.0, 148.4, 147.8, 136.3, 133.5, 132.6, 127.0, 125.7, 125.5, 125.2, 123.6, 123.0, 119.9, 113.8, 105.8, 35.8, 34.9, 32.1, 31.3. IR (KBr)  $\tilde{\nu}$  (cm<sup>-1</sup>) = 3060, 2960, 2910, 2865, 1662, 1608, 1562, 1486, 1367, 1257, 1193, 1110, 1027, 892, 815, 661. HRMS(ESI) (*m/z*): [M+H]<sup>+</sup> calcd. for C<sub>46</sub>H<sub>47</sub>N<sub>2</sub>O<sub>2</sub>Br<sub>2</sub>, 819.1978; found, 819.1971.

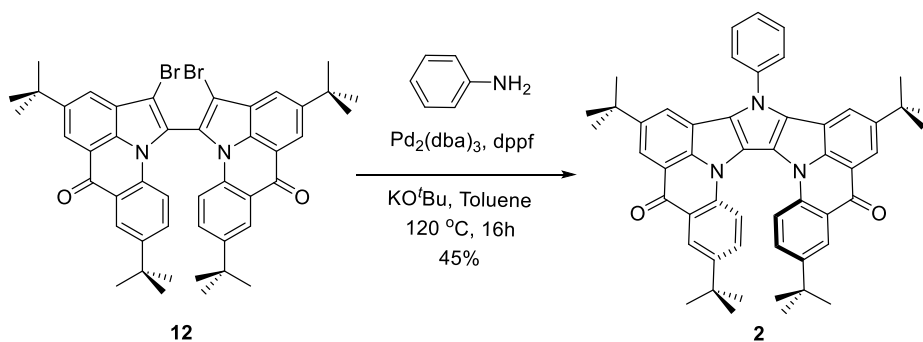

**triaz[a7]helicene (2).** A 8 mL screw capped glass vial was charged with **12** (163 mg, 0.2 mmol), aniline (20 mg, 0.21 mmol) and KO<sup>t</sup>Bu (54 mg, 0.48 mmol). Anhydrous toluene (0.3 mL) was added to the vial and the mixture was bubbled with argon for 3 minutes, followed by adding Pd<sub>2</sub>(dba)<sub>3</sub> (9 mg, 0.01 mmol) and dppf (11 mg, 0.02 mmol). The vial was quickly sealed and heated at 120 °C for 16 hours. After cooling down to room temperature, the reaction mixture was diluted with dichloromethane (150 mL), washed with water (100 mL) and dried over Na<sub>2</sub>SO<sub>4</sub>. The solvent was removed by rotatory evaporation and the crude product was purified by silica gel column chromatography (dichloromethane) to give the product **2** as light yellow solid (67 mg, 45%). m.p. > 400 °C. <sup>1</sup>H NMR (400 MHz, CDCl<sub>3</sub>) δ (ppm) = 8.54 (d, *J* = 2.2 Hz, 2H), 8.36 (s, 2H), 8.01 (d, *J* = 7.9 Hz, 2H), 7.98 (d, *J* = 1.7 Hz, 2H), 7.92 (d, *J* = 8.6 Hz, 2H), 7.77 (t, *J* = 7.8 Hz, 2H), 7.62 (t, *J* = 7.5 Hz, 1H), 7.42 (dd, *J* = 8.6, 2.3 Hz, 2H), 1.45 (s, 18H), 1.40 (s, 18H). <sup>13</sup>CNMR (100 MHz, CDCl<sub>3</sub>) δ (ppm) = 180.0, 146.9, 146.7, 139.1, 138.2, 136.8, 130.3, 130.1, 129.1, 128.3, 124.7, 124.0, 124.0, 120.4, 119.8, 119.4, 119.3, 118.2, 117.8, 35.5, 34.9, 32.0, 31.5. IR (KBr)  $\tilde{\nu}$  (cm<sup>-1</sup>) = 3058, 2958, 2900, 2865, 1650, 1606, 1498, 1369, 1320, 1286, 1257, 1209, 1170, 921, 825, 750. HRMS(ESI) (*m/z*): [M+Na]<sup>+</sup> calcd. for C<sub>52</sub>H<sub>51</sub>N<sub>3</sub>O<sub>2</sub>Na, 772.3873; found, 772.3852.

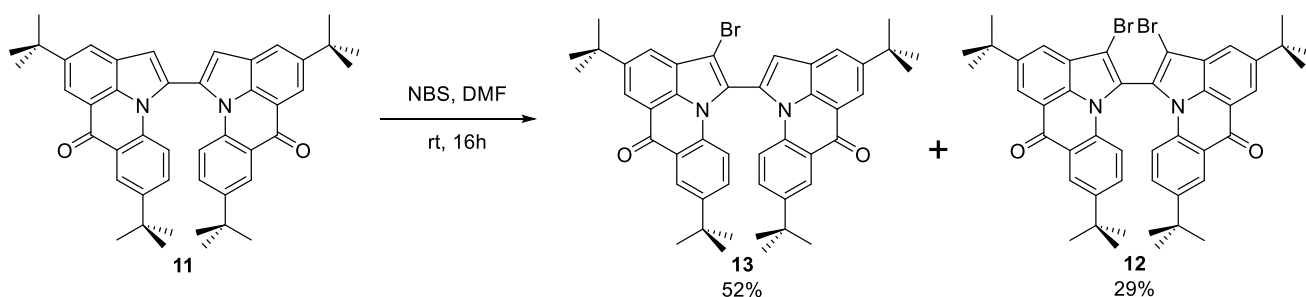

**2-bromo-4,4',8,8'-tetra-*tert*-butyl-[1,1'-bipyrrolo[3,2,1-de]acridone-6,6'-dione (13).** The mixture of **11** (661 mg, 1 mmol), *N*-bromosuccinimide (196 mg, 1.1 mmol) and DMF (10 mL) was stirred at room temperature for 16 h. The reaction mixture was dichloromethane (100 mL), washed with water (3×50 mL) and dried over Na<sub>2</sub>SO<sub>4</sub>. The solvent was removed by rotatory evaporation and the crude product was purified by silica gel column chromatography (dichloromethane) to give compound **13** (382 mg, 52%) and **12** (240 mg, 29%) as yellow solids. m.p. 245-249 °C. <sup>1</sup>H NMR (600 MHz, CDCl<sub>3</sub>) δ (ppm) = 8.60 (s, 1H), 8.58 (s, 1H), 8.56 (d, *J* = 2.4 Hz, 1H), 8.53 (d, *J* = 2.5 Hz, 1H), 8.24 (d, *J* = 1.7 Hz, 1H), 8.13 (d, *J* = 1.7 Hz, 1H), 7.31 (dd, *J* = 8.9, 2.5 Hz, 1H), 7.27 (dd, *J* = 9.0, 2.4 Hz, 1H), 7.20 (s, 1H), 6.90 (d, *J* = 8.9 Hz, 1H), 6.83 (d, *J* = 8.9 Hz, 1H), 1.58 (s, 9H), 1.57 (s, 9H), 1.28 (s, 9H), 1.27 (s, 9H). <sup>13</sup>CNMR (150 MHz, CDCl<sub>3</sub>) δ (ppm) = 179.9, 179.1, 148.4, 147.7, 147.6, 147.3, 136.5, 136.3, 134.4, 133.2, 132.4, 132.3, 127.7, 127.6, 127.5, 127.0, 125.4, 125.3, 125.3, 125.2, 125.1, 123.5, 122.6, 121.6, 119.8, 119.7, 114.5, 114.4, 114.0, 104.7, 35.8, 35.7, 34.8, 34.8, 32.2, 32.1, 31.3, 31.3. IR (KBr)  $\tilde{\nu}$  (cm<sup>-1</sup>) = 2962, 2869, 1657, 1608, 1563, 1490, 1474, 1364, 1313, 1275, 1256, 1199, 1150, 1110, 1061, 814. HRMS(ESI) (*m/z*) : [M+H]<sup>+</sup> calcd. for C<sub>46</sub>H<sub>48</sub>N<sub>2</sub>O<sub>2</sub>Br, 739.2894; found, 739.2887.

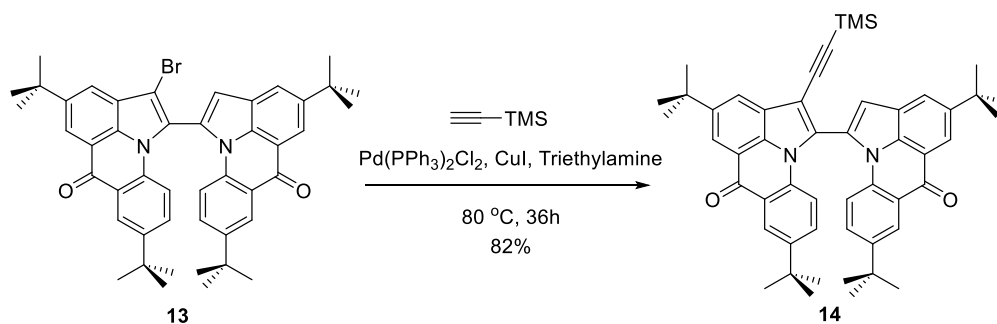

**4,4',8,8'-tetra-*tert*-butyl-2-(trimethylsilylethynyl)-[1,1'-bipyrrolo[3,2,1-de]acridone-6,6'-dione (14).** A 38 mL screw capped glass vial was charged with **13** (400 mg, 0.54 mmol), CuI (1.9 mg, 0.01 mmol) and Pd(PPh<sub>3</sub>)<sub>2</sub>Cl<sub>2</sub> (15 mg, 0.02 mmol). Anhydrous triethylamine (5 mL) was added to the vial and the mixture was bubbled with argon for 3 minutes, followed by adding trimethylsilylacetylene (158 mg, 1.1 mmol). The vial was quickly sealed and heated in an oil-bath at 80 °C for 36 hours. After cooling down to room temperature, the reaction mixture was diluted with dichloromethane (150 mL), washed with water (200 mL) and dried over Na<sub>2</sub>SO<sub>4</sub>. The solvent was removed by rotatory evaporation and the crude product was purified by silica gel column chromatography (dichloromethane) to give the product **14** as yellow solid (335 mg, 82%). m.p. 328-330 °C. <sup>1</sup>H NMR (600 MHz, CDCl<sub>3</sub>) δ (ppm) = 8.57 (d, *J* = 1.7 Hz, 1H), 8.55 (d, *J* = 1.8 Hz, 1H), 8.54 (d, *J* = 2.4 Hz, 1H), 8.52 (d, *J* = 2.5 Hz, 1H), 8.23 (d, *J* = 1.7 Hz, 1H), 8.23 (d, *J* = 1.7 Hz, 1H), 7.30 (dd, *J* = 8.9, 2.5 Hz, 1H), 7.27-7.25 (m, 1H), 7.22 (s, 1H), 6.93 (d, *J* = 3.1 Hz, 1H), 6.91 (d, *J* = 3.2 Hz, 1H), 1.57 (s, 9H), 1.57 (s, 9H), 1.28 (s, 9H),

1.26 (s, 9H), 0.03 (s, 9H).  $^{13}\text{C}$ NMR (150 MHz,  $\text{CDCl}_3$ )  $\delta$  (ppm) = 179.8, 179.4, 148.4, 147.8, 147.6, 147.2, 136.6, 136.0, 134.5, 133.3, 132.6, 132.2, 132.1, 128.1, 128.0, 127.8, 125.4, 125.3, 125.2, 125.1, 124.9, 124.0, 122.0, 121.3, 119.7, 119.7, 114.8, 114.5, 114.1, 109.2, 103.3, 96.0, 35.7, 35.6, 34.8, 34.8, 32.2, 32.1, 31.3, 31.3, 0.1. IR (KBr)  $\tilde{\nu}$  ( $\text{cm}^{-1}$ ) = 2962, 2904, 2869, 2151, 1657, 1608, 1563, 1490, 1474, 1364, 1313, 1275, 1256, 1199, 1150, 1110, 1061, 813, 793, 738. HRMS(ESI) ( $m/z$ ):  $[\text{M}+\text{H}]^+$  calcd. for  $\text{C}_{51}\text{H}_{57}\text{N}_2\text{O}_2\text{Si}$ , 757.4184; found, 757.4179.

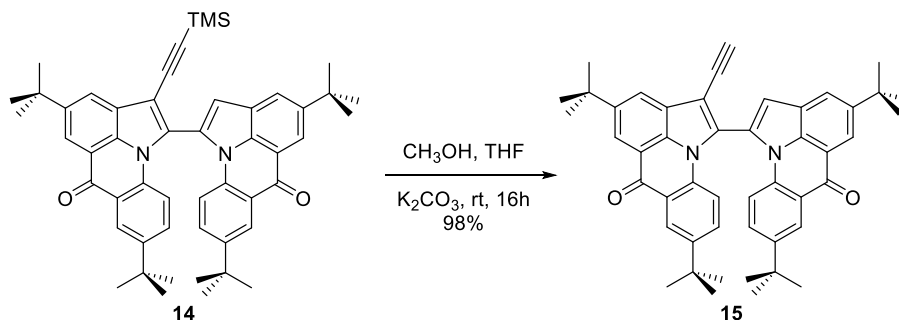

**4,4',8,8'-tetra-*tert*-butyl-2-ethynyl-[1,1'-bipyrrolo[3,2,1-de]acridone-6,6'-dione (15).** A 8 mL screw capped glass vial was charged with **14** (190 mg, 0.25 mmol),  $\text{K}_2\text{CO}_3$  (70 mg, 0.5 mmol), methanol (2 mL) and tetrahydrofuran (2 mL). The mixture was stirred at room temperature for 16 h. The reaction mixture was diluted with dichloromethane (50 mL), washed with water ( $3 \times 100$  mL) and dried over  $\text{Na}_2\text{SO}_4$ . The solvent was removed by rotatory evaporation and the crude product was purified by silica gel column chromatography (dichloromethane) to give the product **15** as yellow solid (168 mg, 98%). m.p.  $323^\circ\text{C}$  (dec.).  $^1\text{H}$  NMR (600 MHz,  $\text{CDCl}_3$ )  $\delta$  (ppm) = 8.57 (s, 1H), 8.57 (s, 1H), 8.54 (d,  $J = 2.4$  Hz, 1H), 8.52 (d,  $J = 2.4$  Hz, 1H), 8.28 (d,  $J = 1.7$  Hz, 1H), 8.23 (d,  $J = 1.7$  Hz, 1H), 7.29 (dd,  $J = 8.9, 2.5$  Hz, 1H), 7.26-7.24 (m, 1H), 7.24 (s, 1H), 6.84 (d,  $J = 8.9$  Hz, 1H), 6.79 (d,  $J = 9.0$  Hz, 1H), 3.27 (s, 1H), 1.58 (s, 9H), 1.56 (s, 9H), 1.27 (s, 9H), 1.26 (s, 9H).  $^{13}\text{C}$ NMR (150 MHz,  $\text{CDCl}_3$ )  $\delta$  (ppm) = 179.7, 179.4, 148.5, 147.9, 147.7, 147.3, 136.5, 136.0, 134.5, 133.2, 132.9, 132.3, 132.2, 128.1, 127.7, 127.7, 125.4, 125.4, 125.3, 125.2, 125.1, 124.0, 122.2, 121.5, 119.8, 119.8, 114.6, 114.1, 114.1, 107.9, 84.7, 75.1, 35.8, 35.6, 34.8, 34.8, 32.2, 32.1, 31.3, 31.3. IR (KBr)  $\tilde{\nu}$  ( $\text{cm}^{-1}$ ) = 3117, 3048, 2961, 2868, 1656, 1607, 1490, 1472, 1364, 1313, 1275, 1256, 1199, 1150, 1110, 1061, 813, 793, 738. HRMS(ESI) ( $m/z$ ):  $[\text{M}+\text{H}]^+$  calcd. for  $\text{C}_{48}\text{H}_{49}\text{N}_2\text{O}_2$ , 685.3789; found, 685.3779.

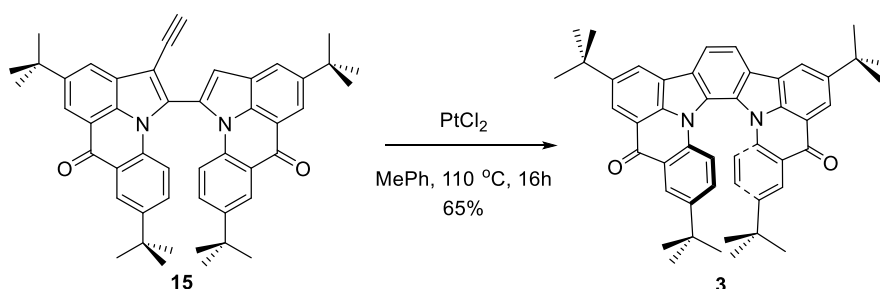

**diaza[7]helicene (3).** A 8 mL screw capped glass vial was charged with **15** (116 mg, 0.17 mmol) and  $\text{PtCl}_2$  (2.27 mg, 5% mmol). Anhydrous toluene (5 mL) was added to the vial and the mixture was bubbled with argon for 3 minutes. The vial was quickly sealed and heated in a heating mantle at  $110^\circ\text{C}$  for 16 hours. After cooling down to room temperature, the reaction mixture was diluted with dichloromethane (50 mL), washed with water (100 mL) and dried over  $\text{Na}_2\text{SO}_4$ . The solvent was



removed by rotatory evaporation and the crude product was purified by silica gel column chromatography (dichloromethane / petroleum ether 1:1) to give the product **3** as yellow solid (76 mg, 65%). m.p. > 400 °C (dec.). <sup>1</sup>H NMR (600 MHz, CDCl<sub>3</sub>) δ (ppm) = 8.53 (s, 2H), 8.52 (s, 2H), 8.46 (d, *J* = 2.3 Hz, 2H), 8.26 (s, 2H), 7.54 (d, *J* = 8.7 Hz, 2H), 7.02 (dd, *J* = 8.7, 2.3 Hz, 2H), 1.58 (s, 18H), 1.24 (s, 18H). <sup>13</sup>CNMR (150 MHz, CDCl<sub>3</sub>) δ (ppm) = 180.4, 147.8, 147.0, 138.5, 138.4, 129.6, 128.5, 126.7, 125.2, 124.6, 124.3, 122.6, 121.7, 119.9, 118.6, 116.8, 35.7, 34.7, 32.2, 31.4. IR (KBr)  $\tilde{\nu}$  (cm<sup>-1</sup>) = 2959, 2867, 1657, 1609, 1486, 1462, 1418, 1394, 1363, 1344, 1310, 1279, 1247, 1192, 1160, 1133, 828, 811, 699. HRMS(ESI) (*m/z*) : [M+H]<sup>+</sup> calcd. for C<sub>48</sub>H<sub>49</sub>N<sub>2</sub>O<sub>2</sub>, 685.3789; found, 685.3787.

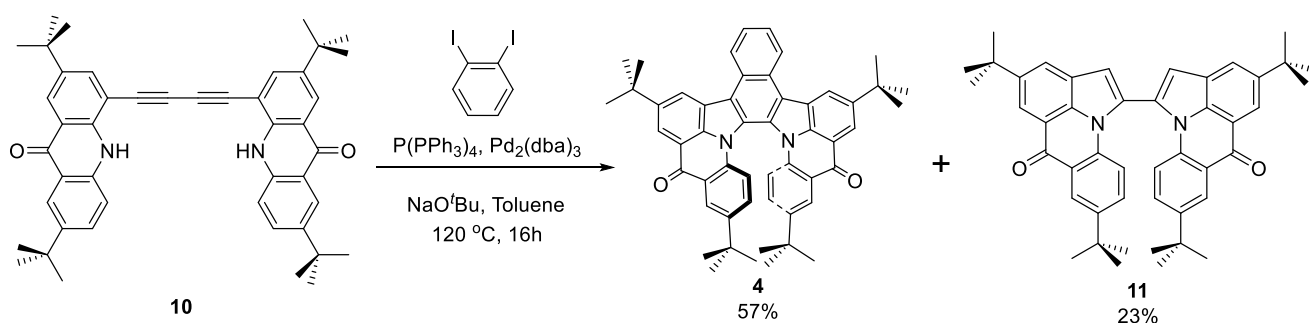

**diaza[7]helicene (4).** A 8 mL screw capped glass vial was charged with **10** (264 mg, 0.4 mmol), 1,2-diodobenzene (158 mg, 0.48 mmol) and NaO<sup>t</sup>Bu (85 mg, 0.88 mmol). Anhydrous toluene (1 mL) was added to the vial and the mixture was bubbled with argon for 3 minutes, followed by adding Pd<sub>2</sub>(dba)<sub>3</sub> (8 mg, 0.0087 mmol) and Pd(PPh<sub>3</sub>)<sub>4</sub> (24 mg, 0.02 mmol). The vial was quickly sealed and heated at 120 °C for 16 hours. After cooling down to room temperature, the reaction mixture was diluted with dichloromethane (150 mL), washed with water (100 mL) and dried over Na<sub>2</sub>SO<sub>4</sub>. The solvent was removed by rotatory evaporation and the crude product was purified by silica gel column chromatography (dichloromethane) to give the product **4** (167 mg, 57%) and **11** (61 mg, 23%) as yellow solids. m.p. 300-302 °C. <sup>1</sup>H NMR (400 MHz, CDCl<sub>3</sub>) δ (ppm) = 9.07 - 9.05 (m, 2H), 9.04 (br s, 2H), 8.61 (d, *J* = 1.5 Hz, 2H), 8.45 (d, *J* = 2.3 Hz, 2H), 7.90 - 7.88 (m, 2H), 7.52 (d, *J* = 8.8 Hz, 2H), 7.03 (dd, *J* = 8.8, 2.3 Hz, 2H), 1.67 (s, 18H), 1.23 (s, 18H). <sup>13</sup>CNMR (100 MHz, CDCl<sub>3</sub>) δ (ppm) = 180.5, 148.1, 147.4, 137.8, 137.8, 129.8, 127.7, 126.6, 126.1, 125.6, 124.9, 124.8, 124.6, 124.4, 122.8, 121.3, 120.1, 118.2, 35.9, 34.7, 32.3, 31.4. IR (KBr)  $\tilde{\nu}$  (cm<sup>-1</sup>) = 3091, 2962, 2904, 2873, 1660, 1602, 1536, 1481, 1367, 1268, 1209, 1070, 831, 744. HRMS(ESI) (*m/z*) : [M+H]<sup>+</sup> calcd. for C<sub>52</sub>H<sub>51</sub>N<sub>2</sub>O<sub>2</sub>, 735.3945; found, 735.3952.

### 3. NMR Spectra

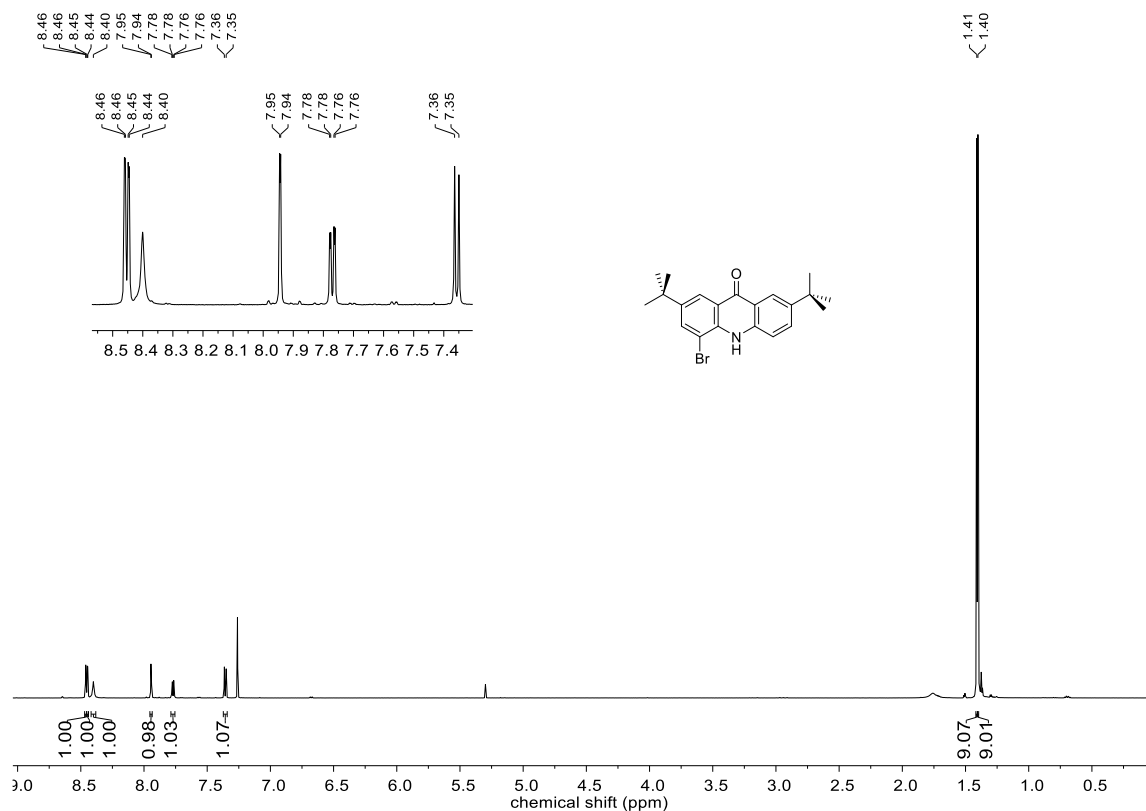

Figure S1. <sup>1</sup>H NMR spectrum (CDCl<sub>3</sub>, 600 MHz) of 6

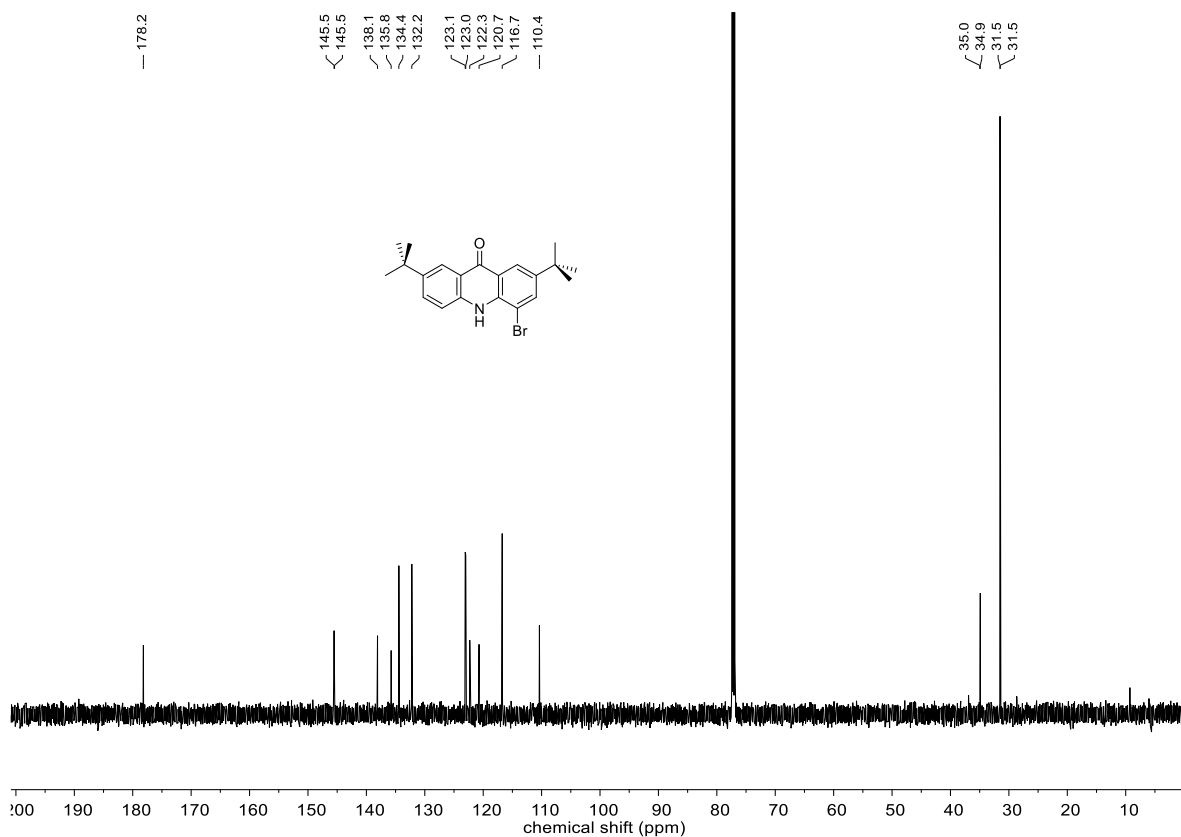

Figure S2. <sup>13</sup>C NMR spectrum (CDCl<sub>3</sub>, 150 MHz) of 6

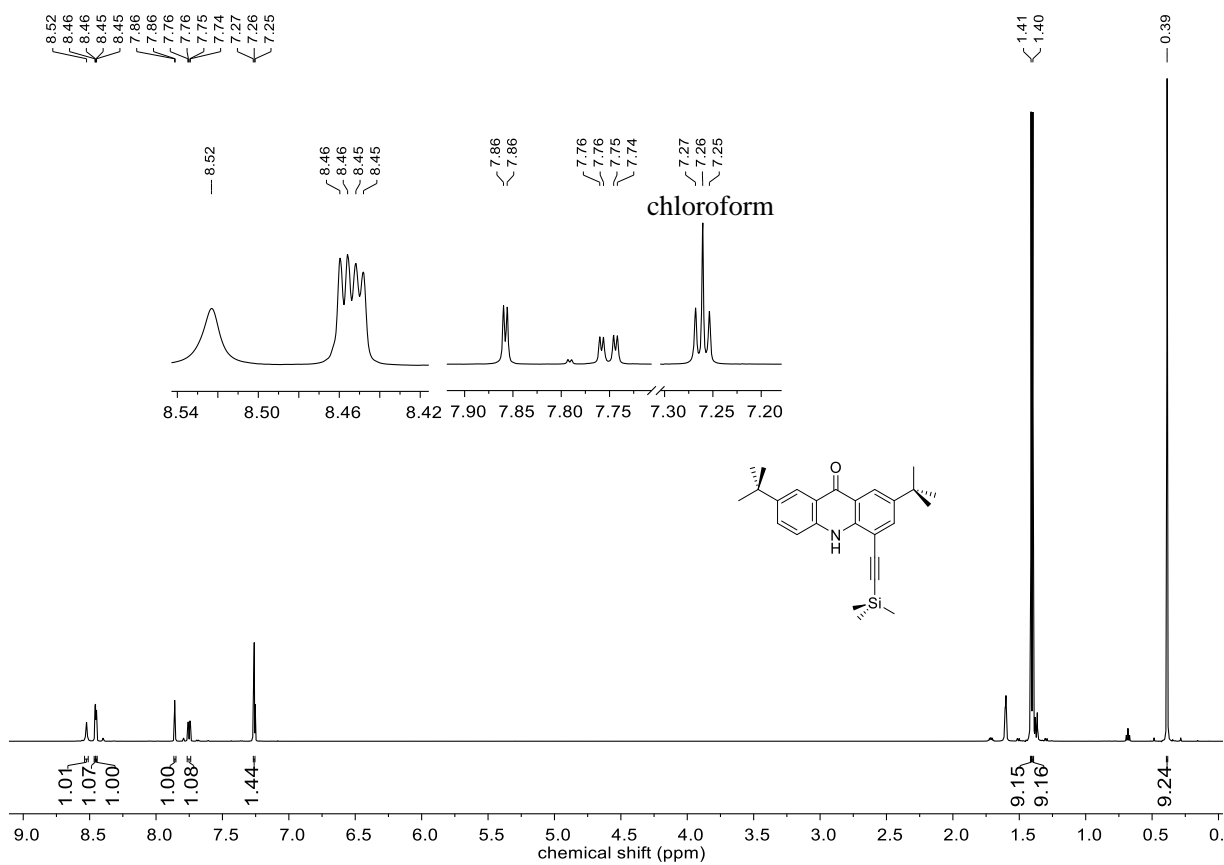

Figure S3.  $^1\text{H}$  NMR spectrum ( $\text{CDCl}_3$ , 600 MHz) of 7

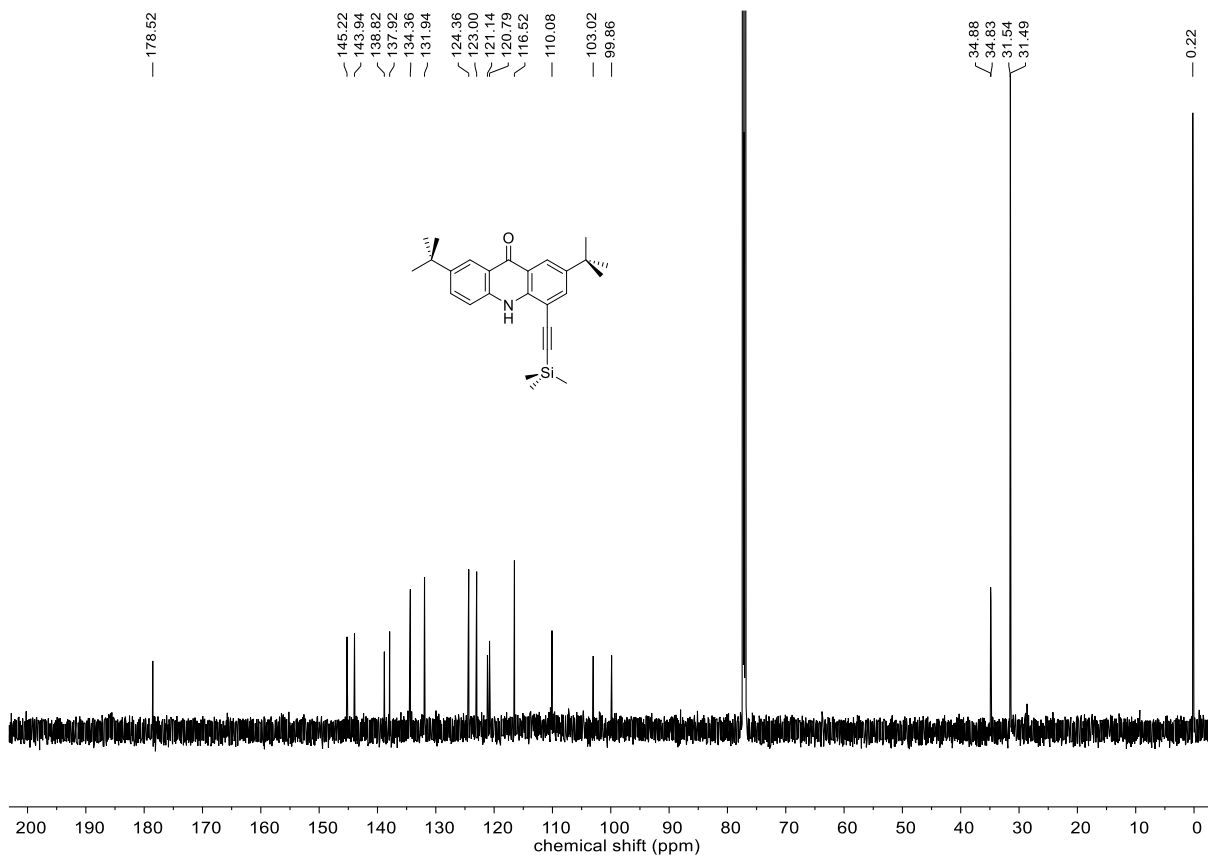

Figure S4.  $^{13}\text{C}$  NMR spectrum ( $\text{CDCl}_3$ , 150 MHz) of 7

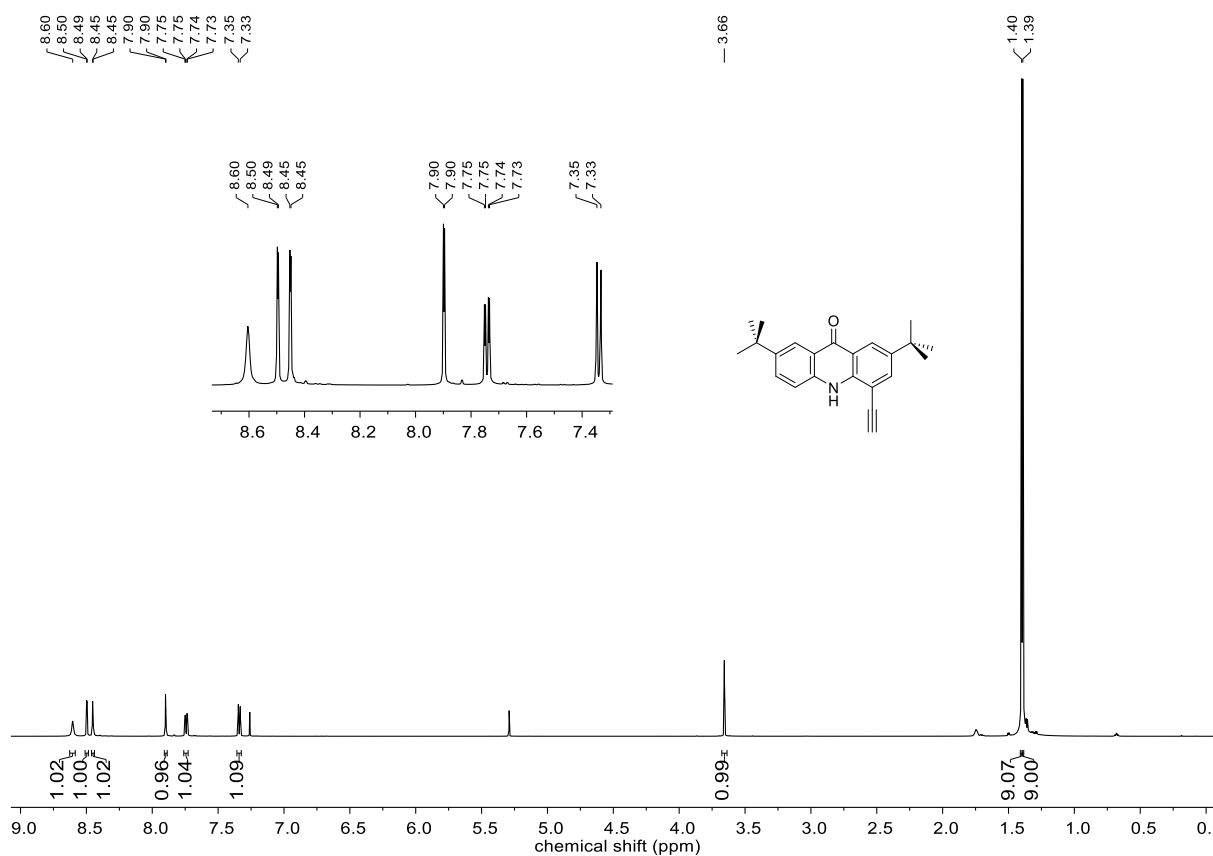

**Figure S5.** <sup>1</sup>H NMR spectrum (CDCl<sub>3</sub>, 600 MHz) of **8**

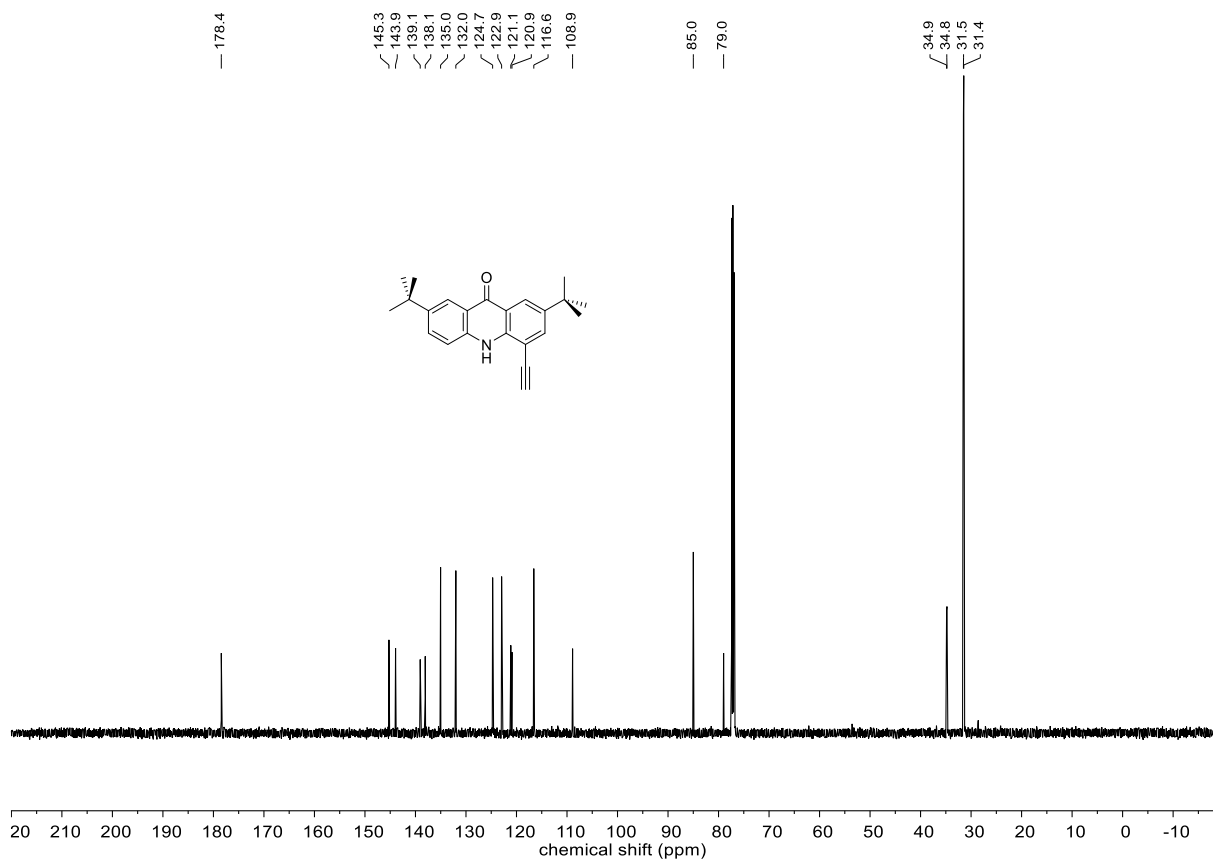

**Figure S6.** <sup>13</sup>C NMR spectrum (CDCl<sub>3</sub>, 150 MHz) of **8**

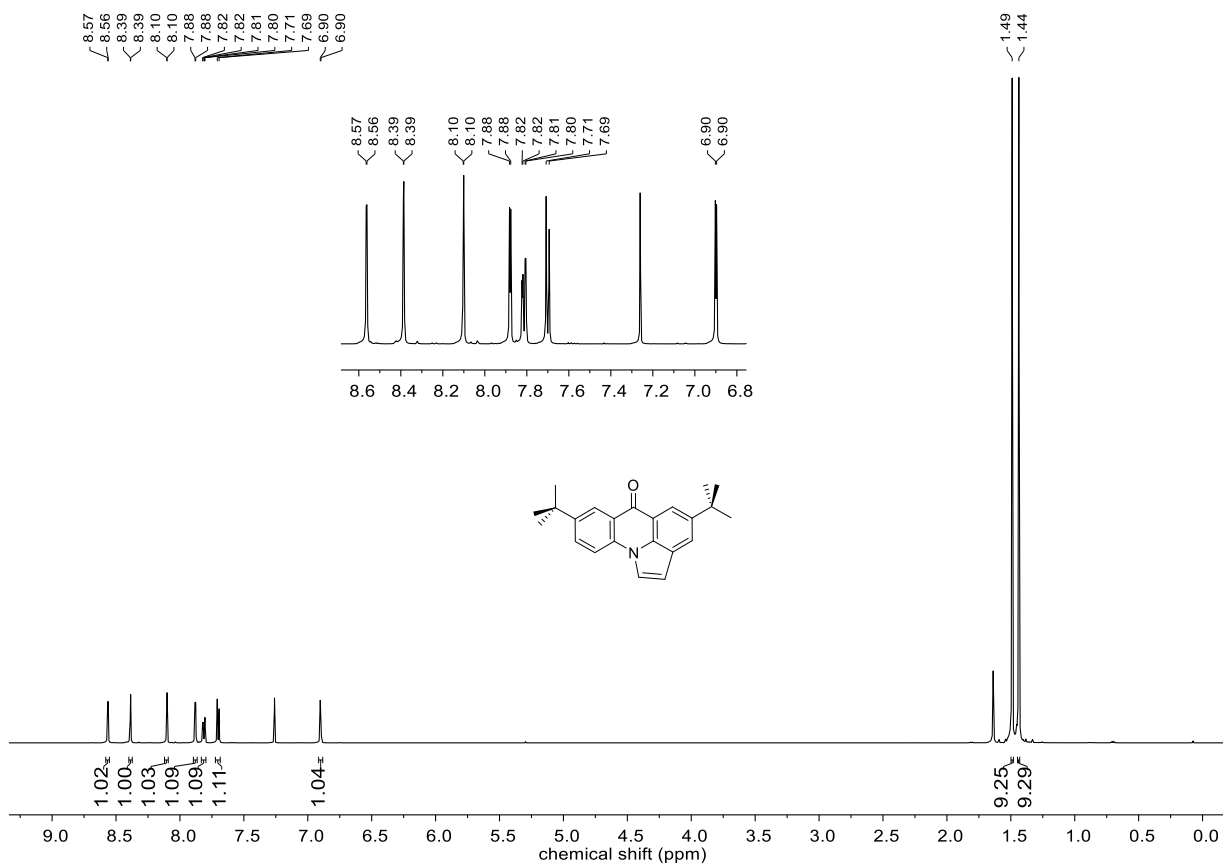

**Figure S7.**  $^1\text{H}$  NMR spectrum ( $\text{CDCl}_3$ , 600 MHz) of **9**

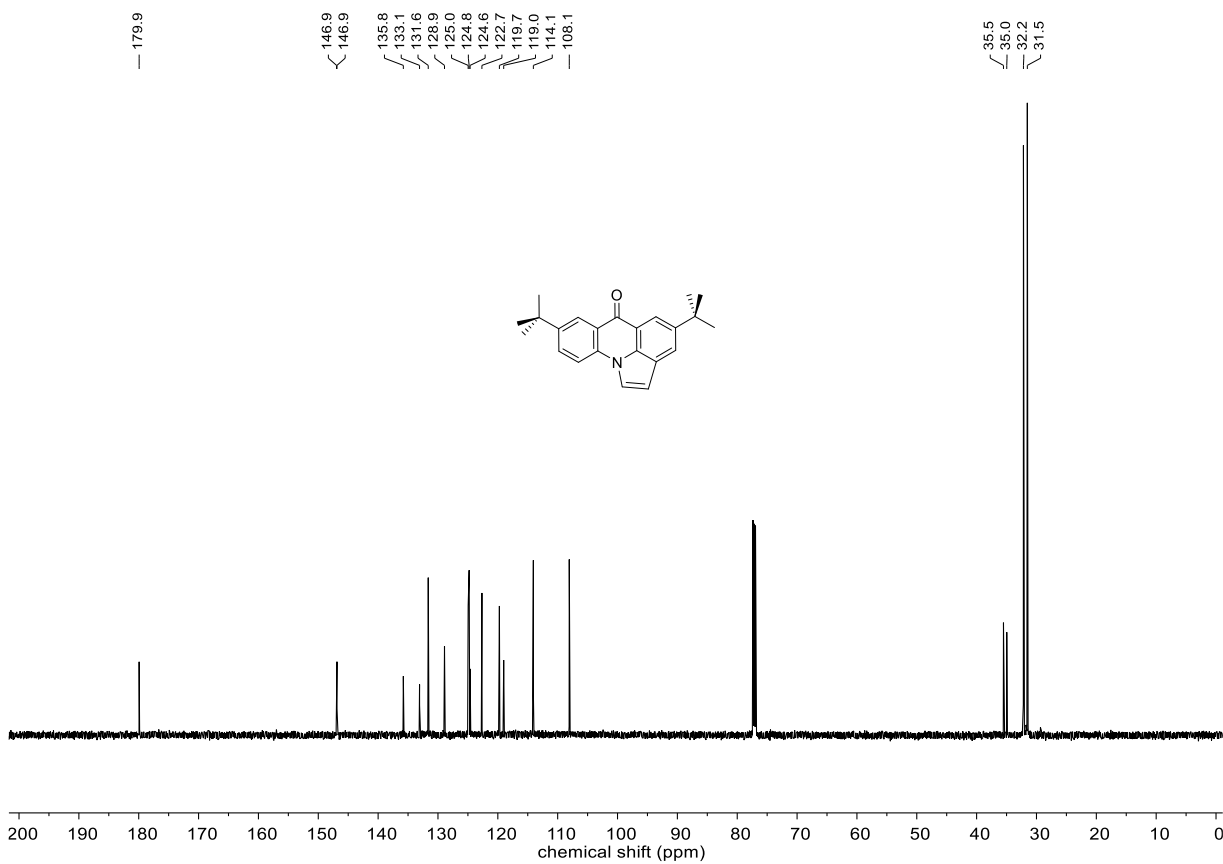

**Figure S8.**  $^{13}\text{C}$  NMR spectrum ( $\text{CDCl}_3$ , 150 MHz) of **9**

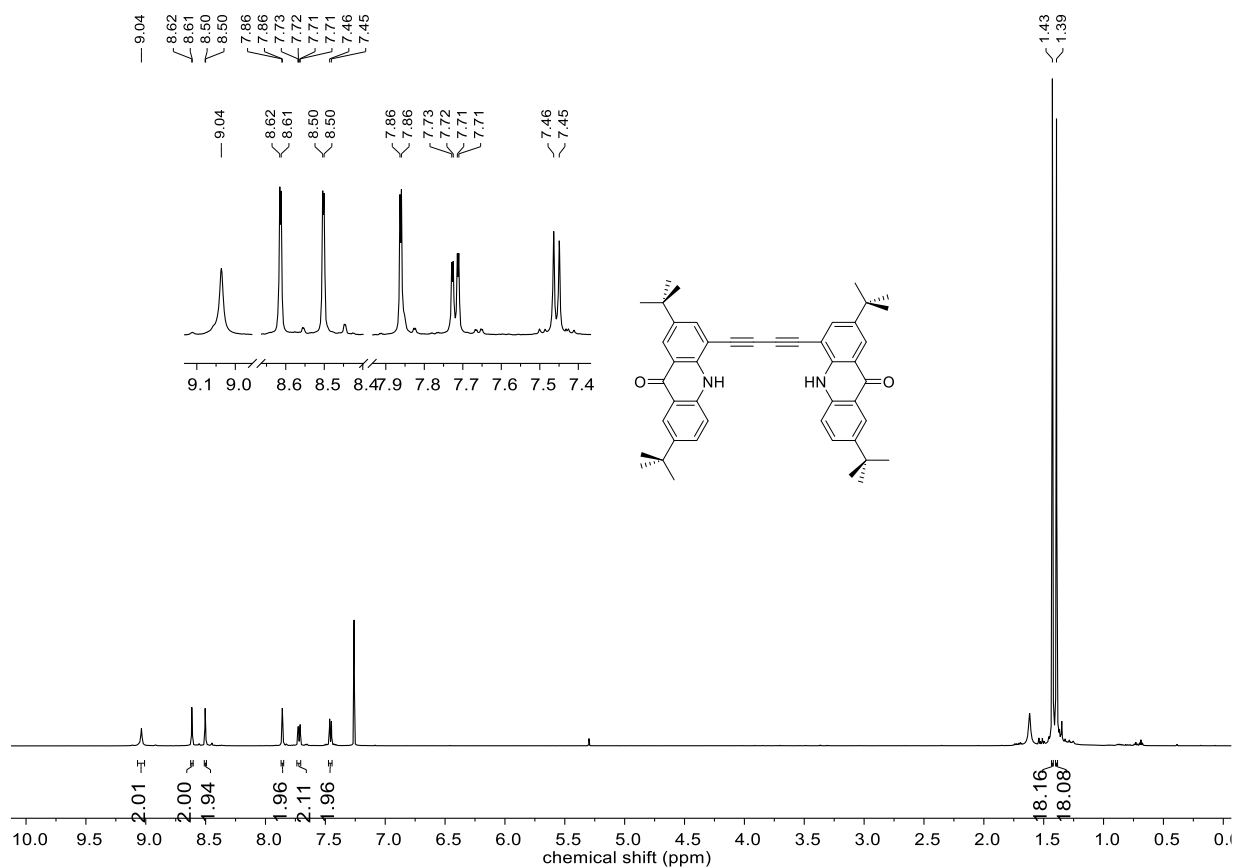

**Figure S9.** <sup>1</sup>H NMR spectrum (CDCl<sub>3</sub>, 600 MHz) of **10**

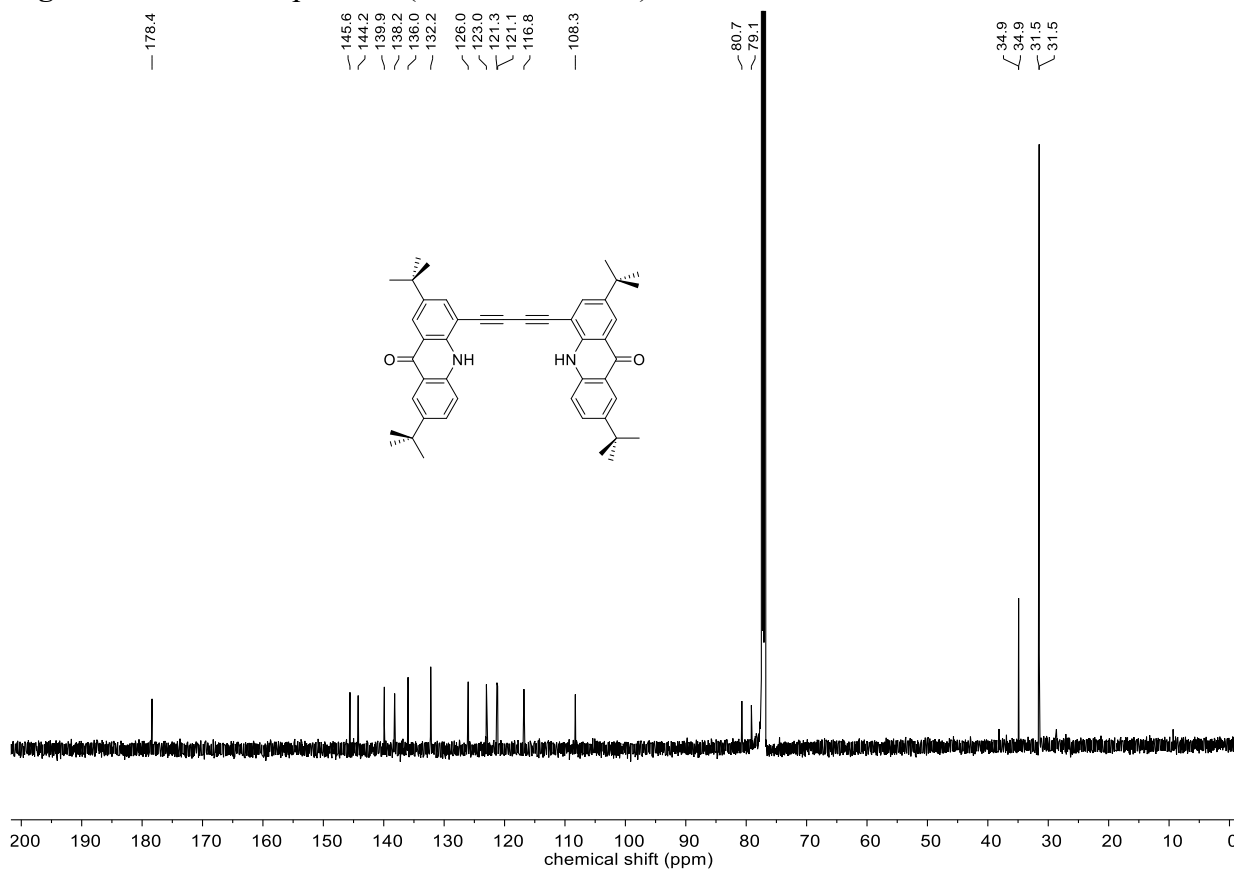

**Figure S10.** <sup>13</sup>C NMR spectrum (CDCl<sub>3</sub>, 150 MHz) of **10**

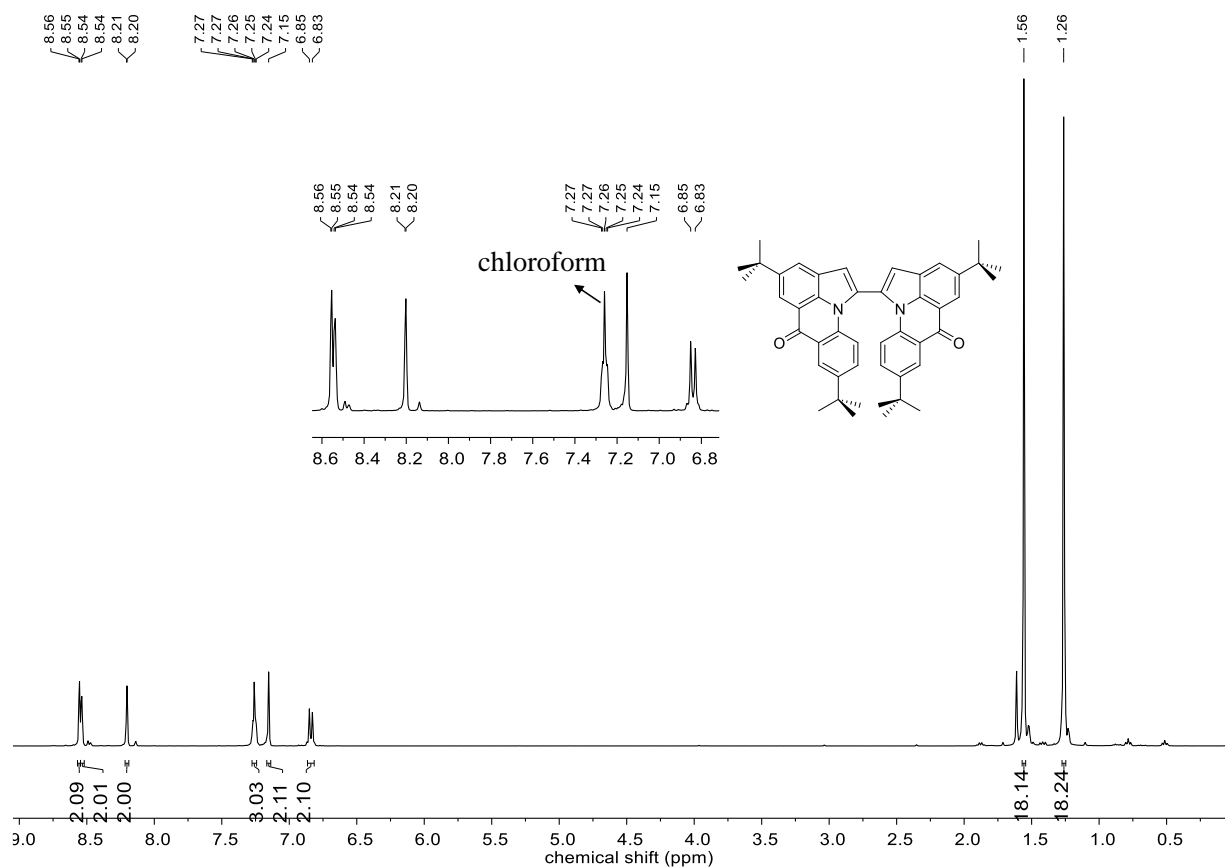

**Figure S11.**  $^1\text{H}$  NMR spectrum (CDCl<sub>3</sub>, 400 MHz) of **11**

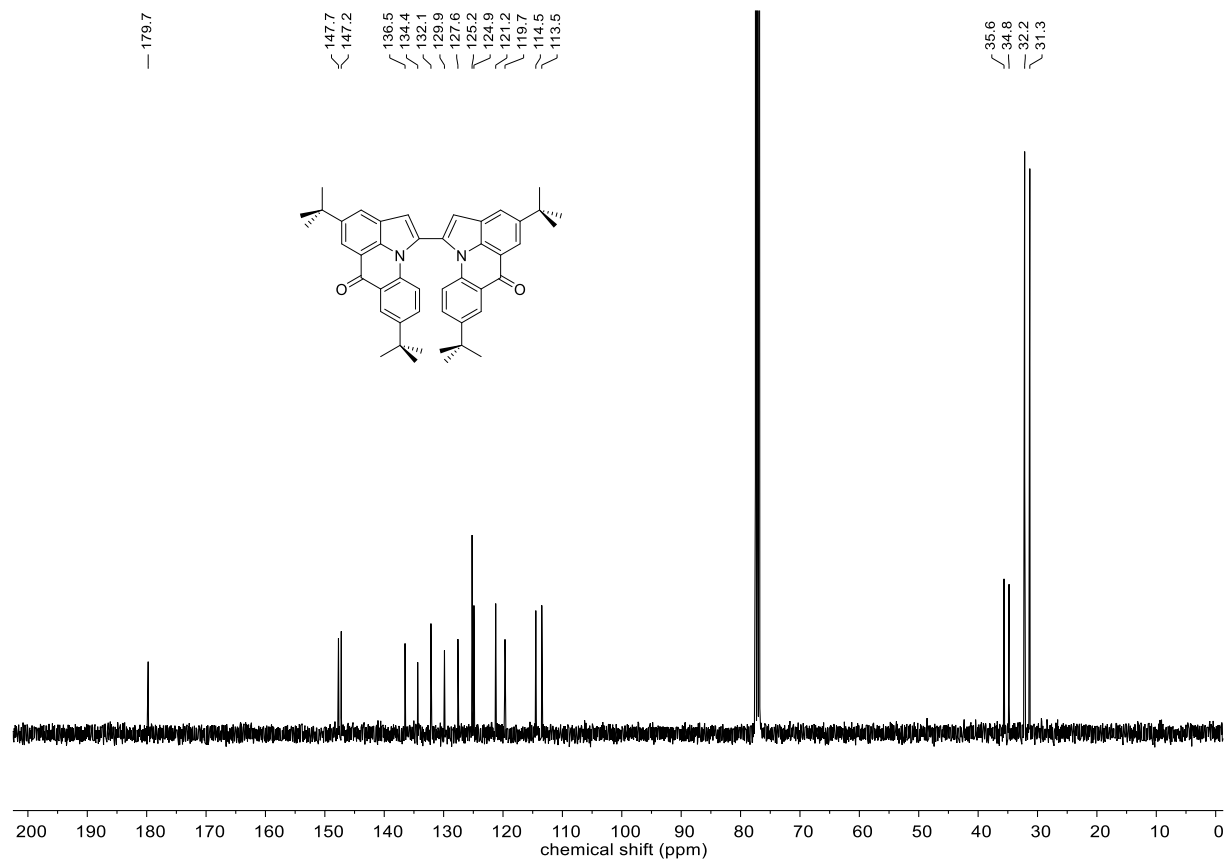

**Figure S12.**  $^{13}\text{C}$  NMR spectrum (CDCl<sub>3</sub>, 100 MHz) of **11**

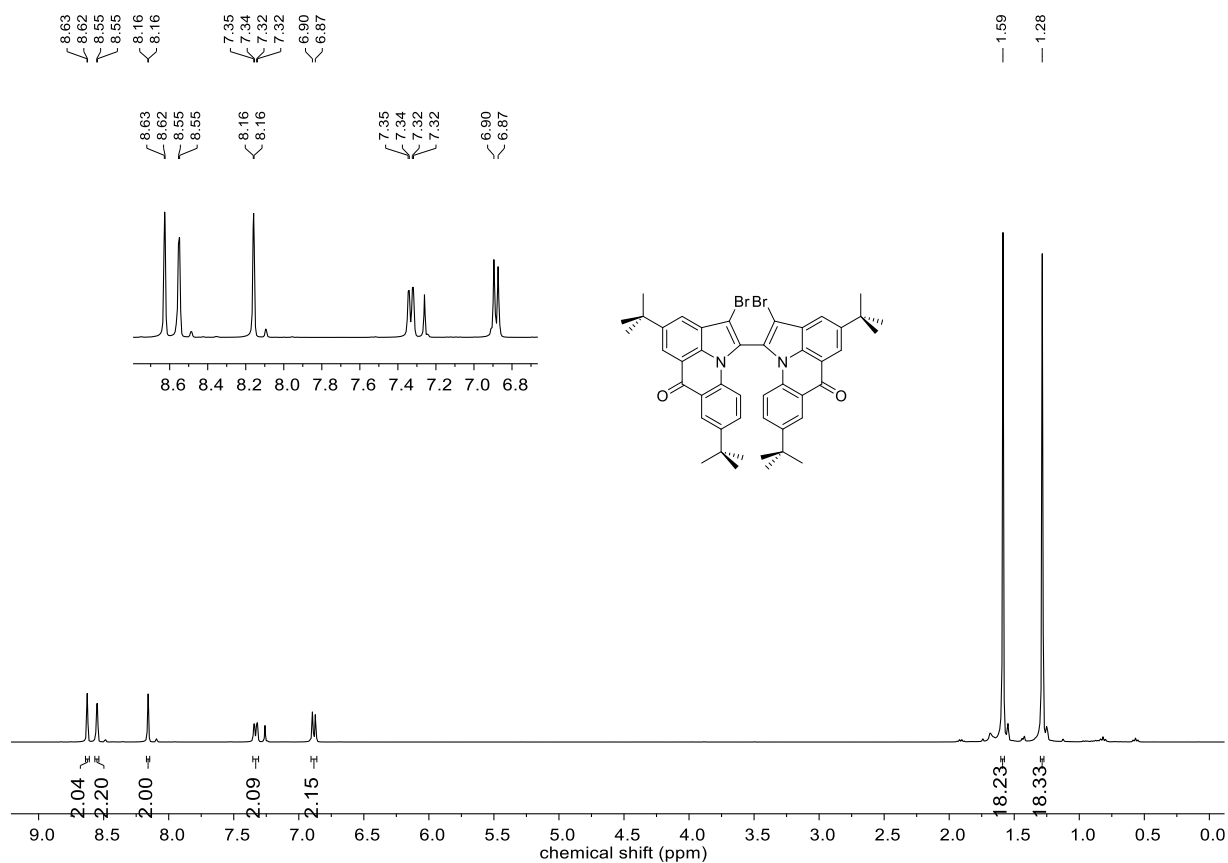

**Figure S13.** <sup>1</sup>H NMR spectrum (CDCl<sub>3</sub>, 400 MHz) of **12**

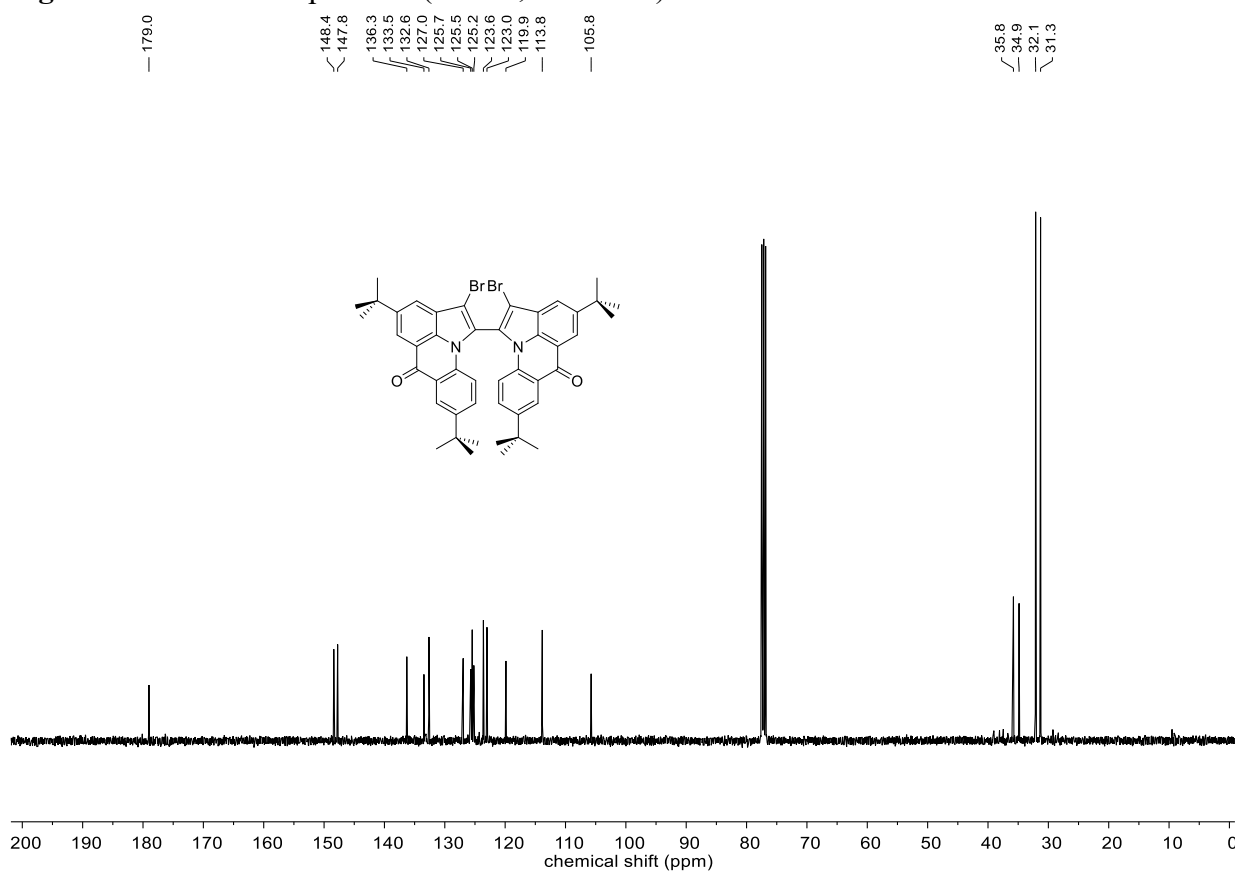

**Figure S14.** <sup>13</sup>C NMR spectrum (CDCl<sub>3</sub>, 100 MHz) of **12**



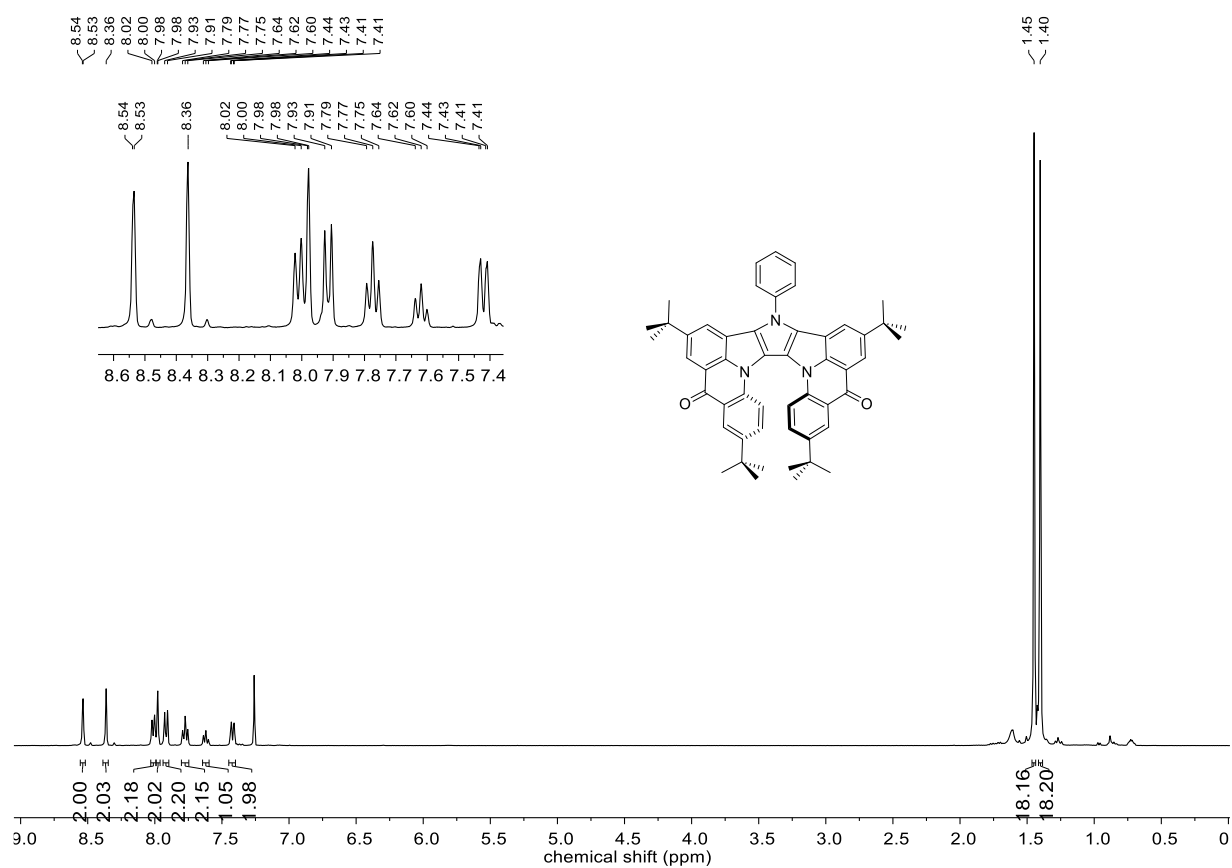

Figure S15.  $^1\text{H}$  NMR spectrum ( $\text{CDCl}_3$ , 400 MHz) of **2**

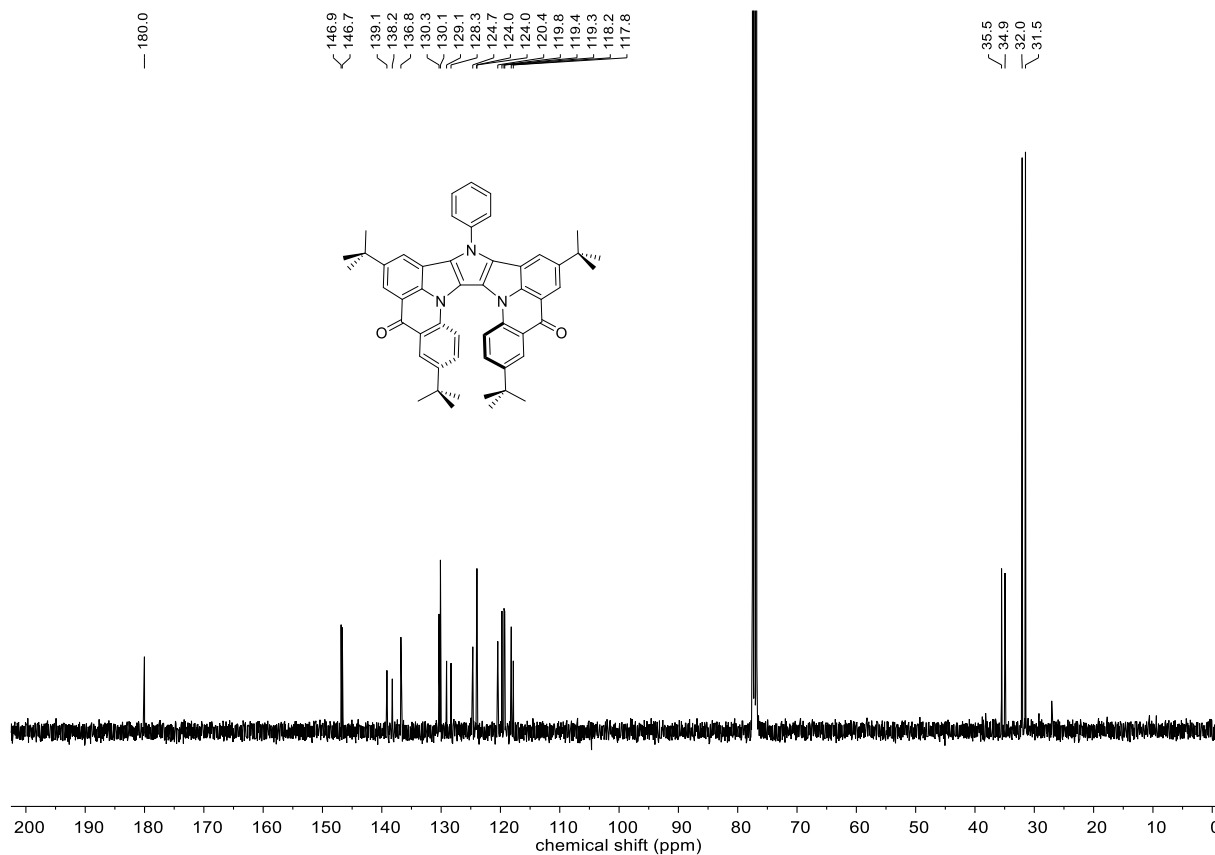

Figure S16.  $^{13}\text{C}$  NMR spectrum ( $\text{CDCl}_3$ , 100 MHz) of **2**.

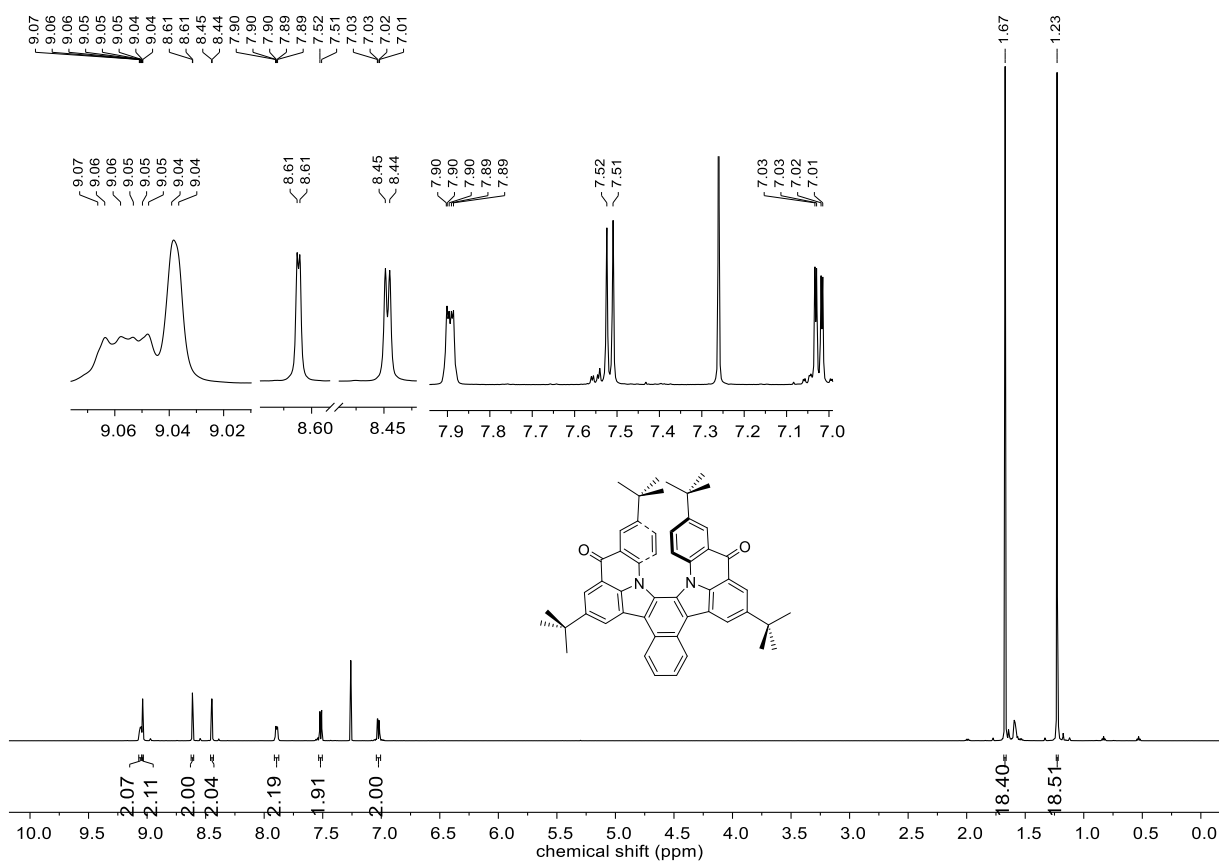

Figure S17.  $^1\text{H}$  NMR spectrum (CDCl<sub>3</sub>, 400 MHz) of 4

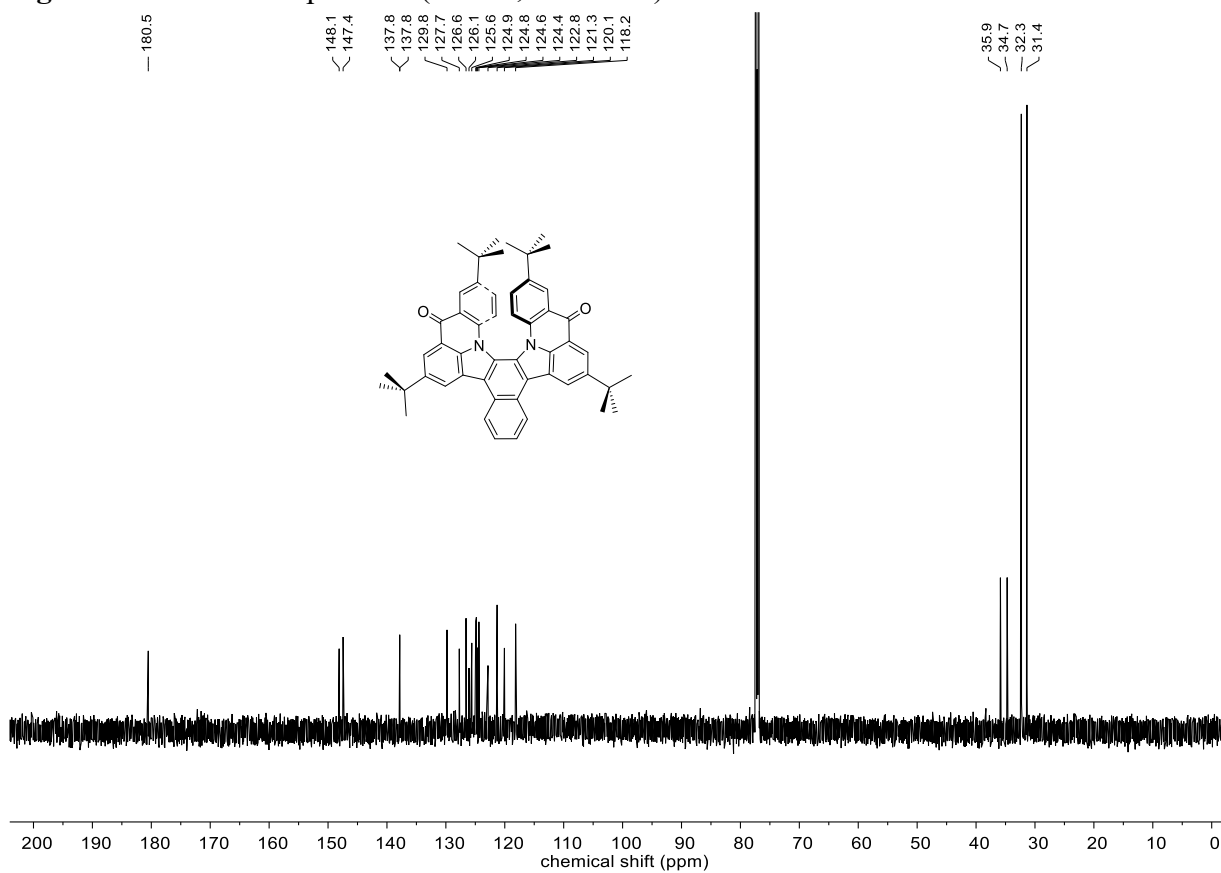

Figure S18.  $^{13}\text{C}$  NMR spectrum (CDCl<sub>3</sub>, 100 MHz) of 4

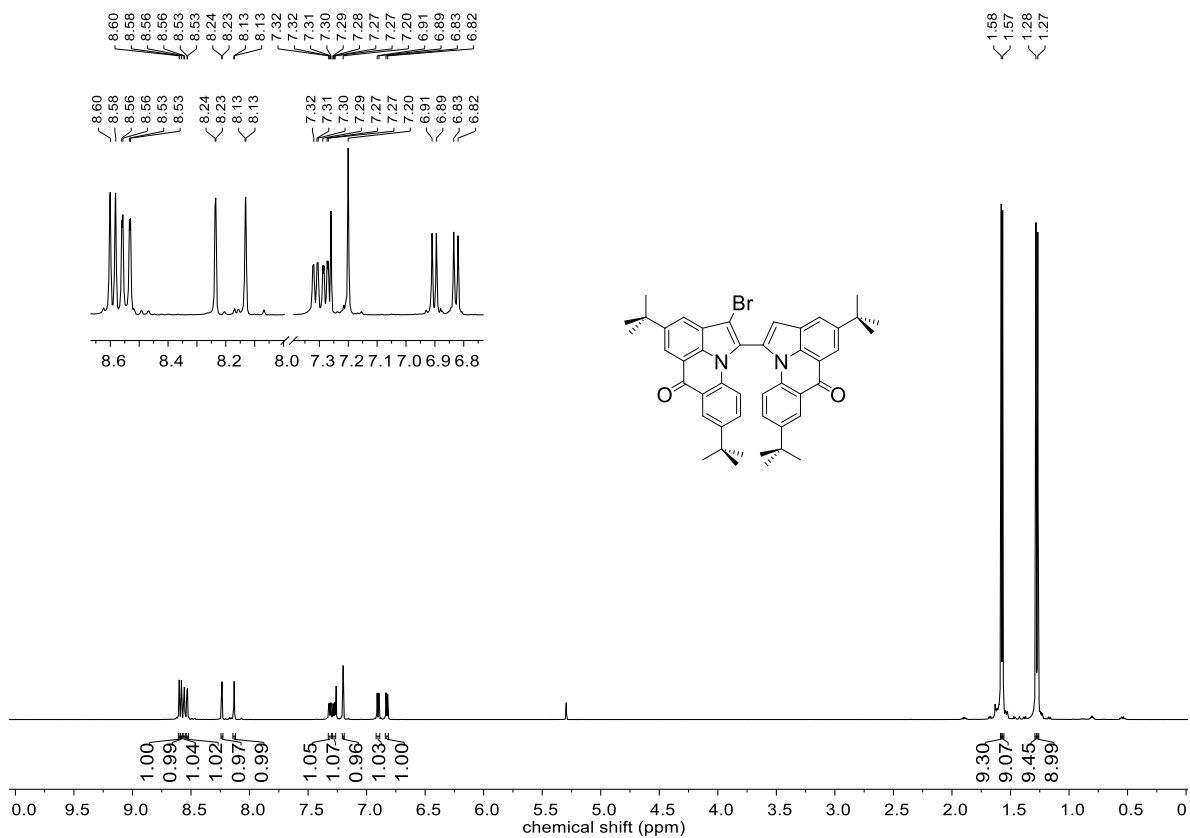

**Figure S19.  $^1\text{H}$  NMR spectrum ( $\text{CDCl}_3$ , 600 MHz) of **13****

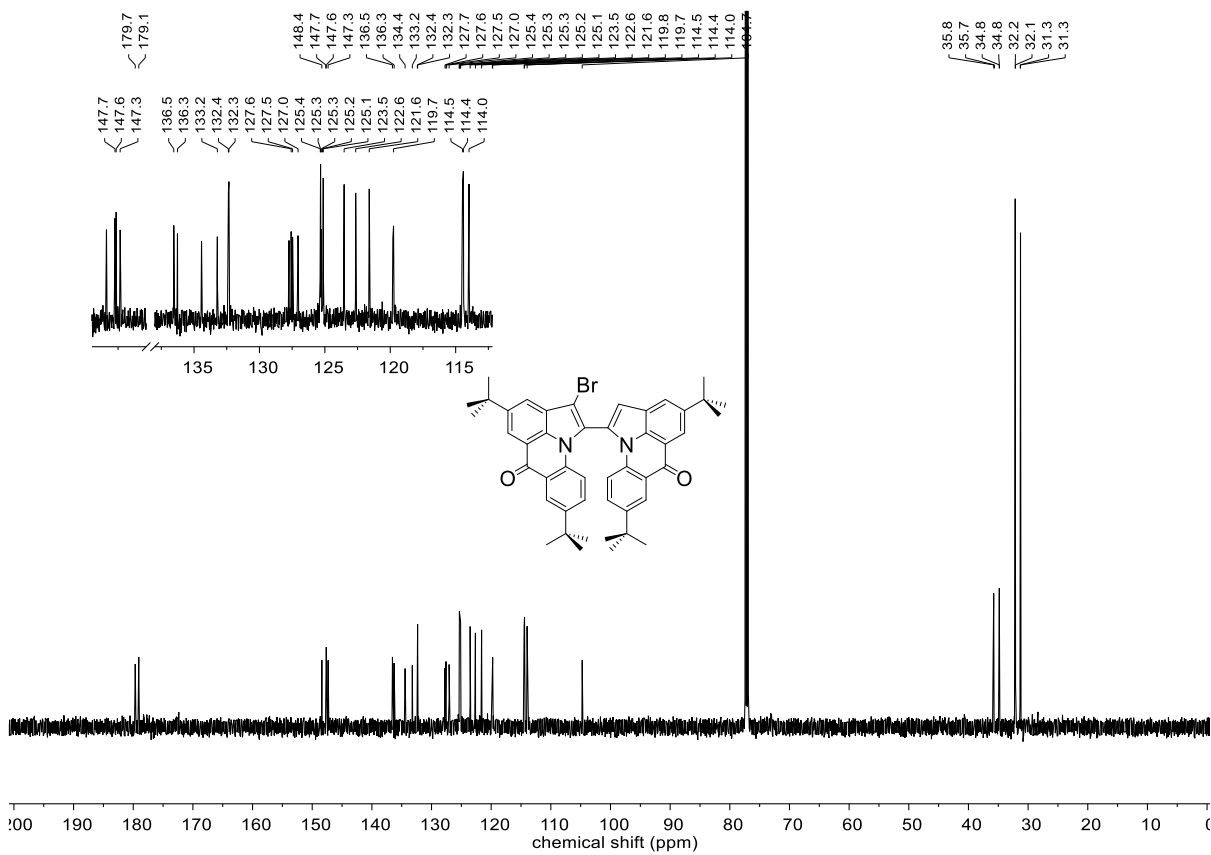

**Figure S20.  $^{13}\text{C}$  NMR spectrum ( $\text{CDCl}_3$ , 150 MHz) of **13****



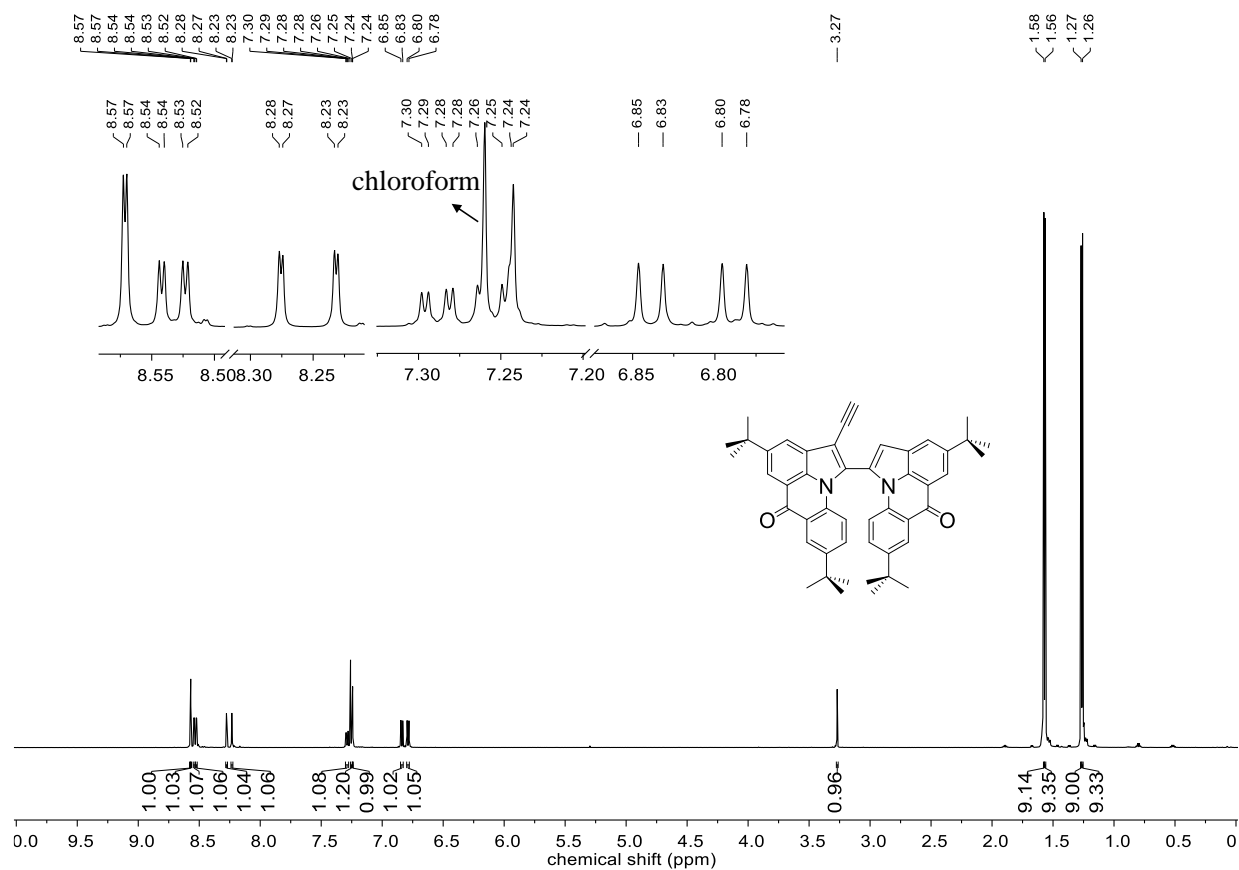

Figure S23.  $^1\text{H}$  NMR spectrum (CDCl<sub>3</sub>, 600 MHz) of 15

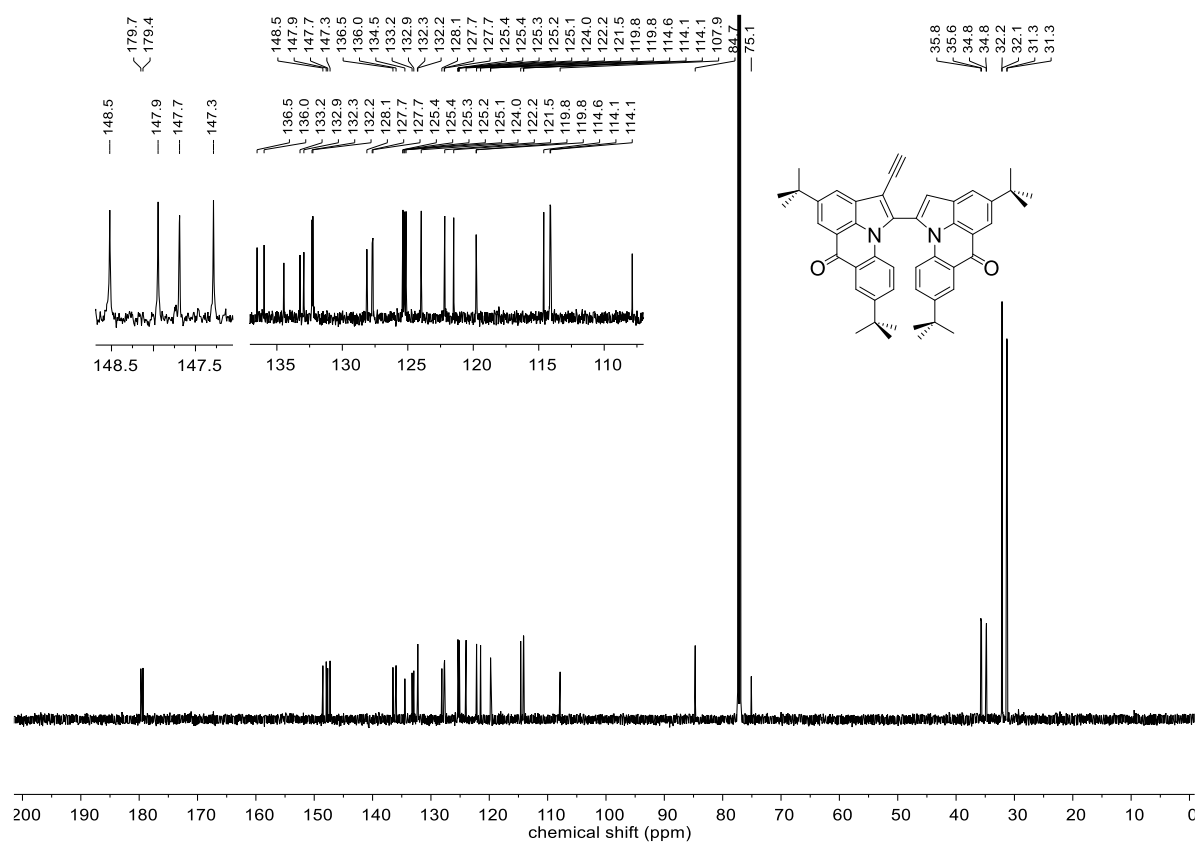

Figure S24.  $^{13}\text{C}$  NMR spectrum (CDCl<sub>3</sub>, 150 MHz) of 15

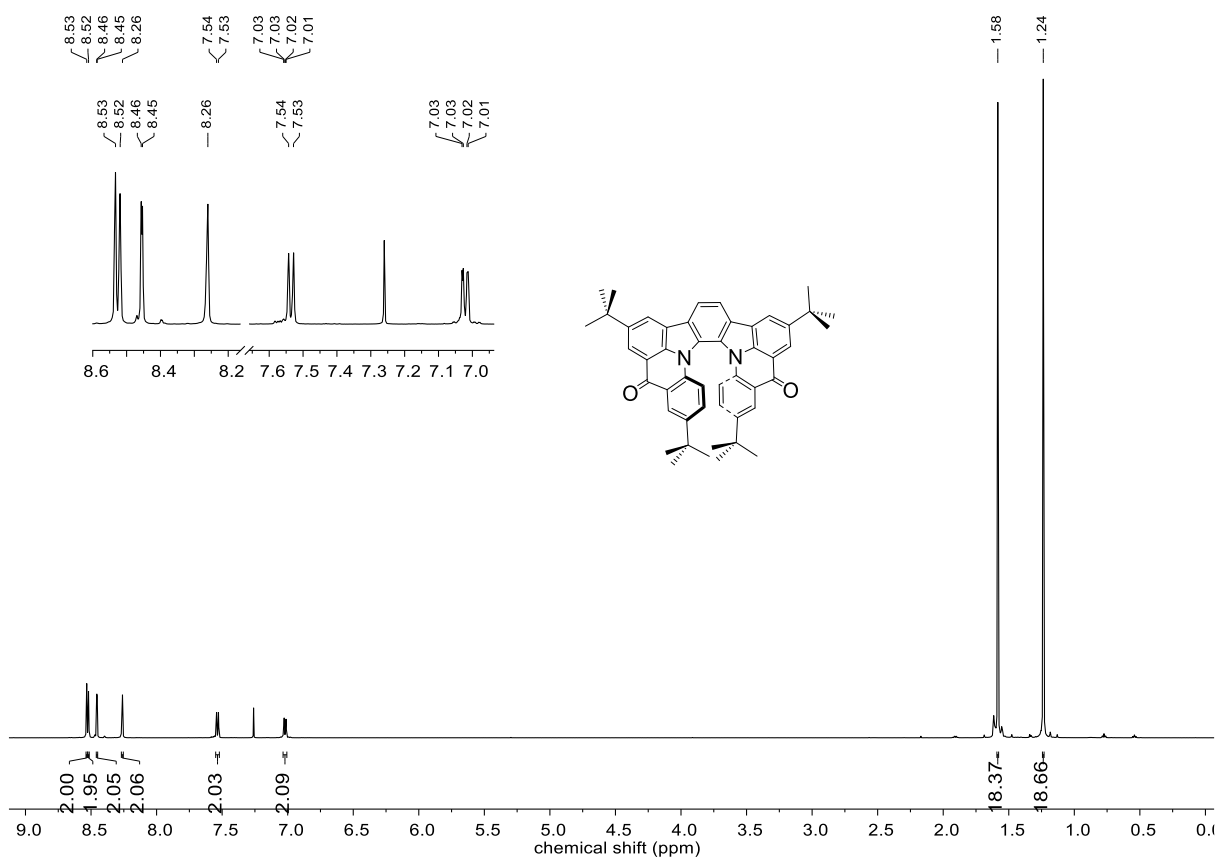

**Figure S25.**  $^1\text{H}$  NMR spectrum ( $\text{CDCl}_3$ , 600 MHz) of **3**

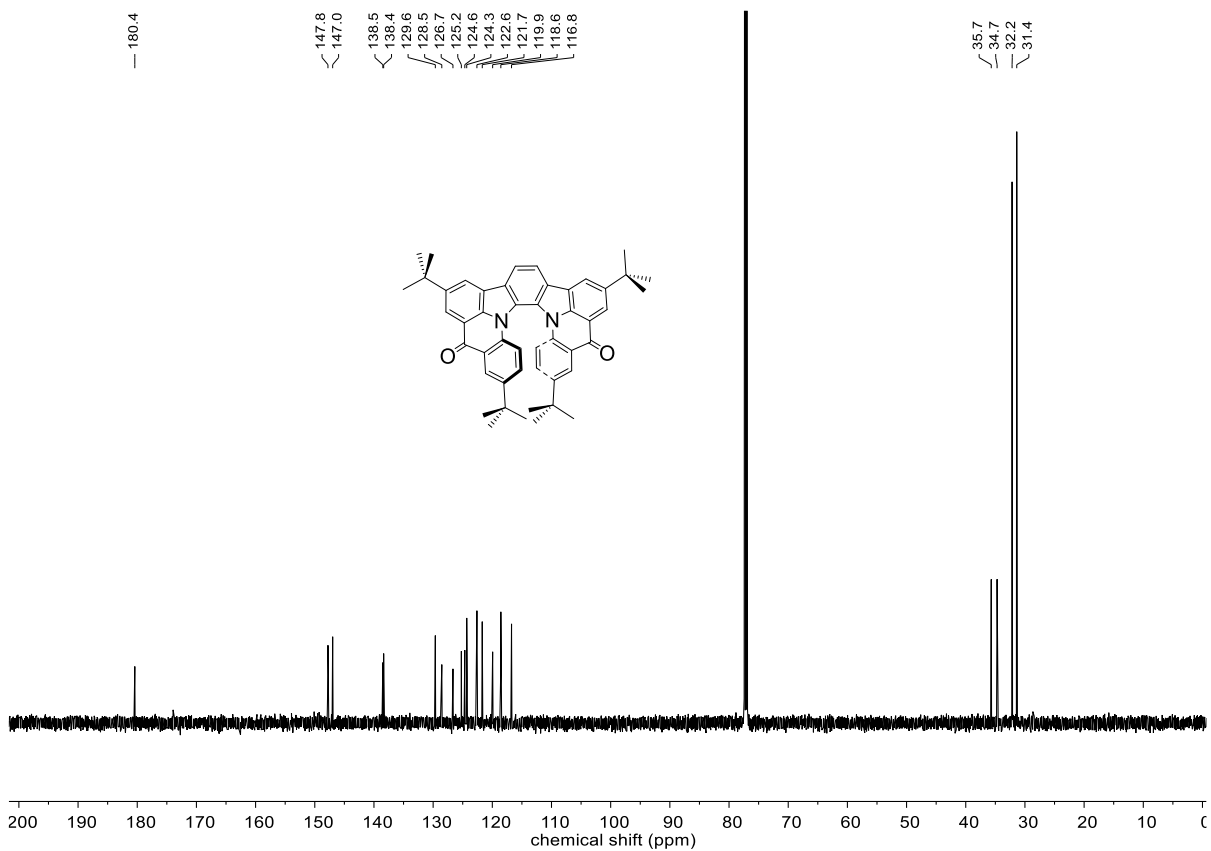

**Figure S26.**  $^{13}\text{C}$  NMR spectrum ( $\text{CDCl}_3$ , 150 MHz) of **3**

#### 4. Fluorescence spectra

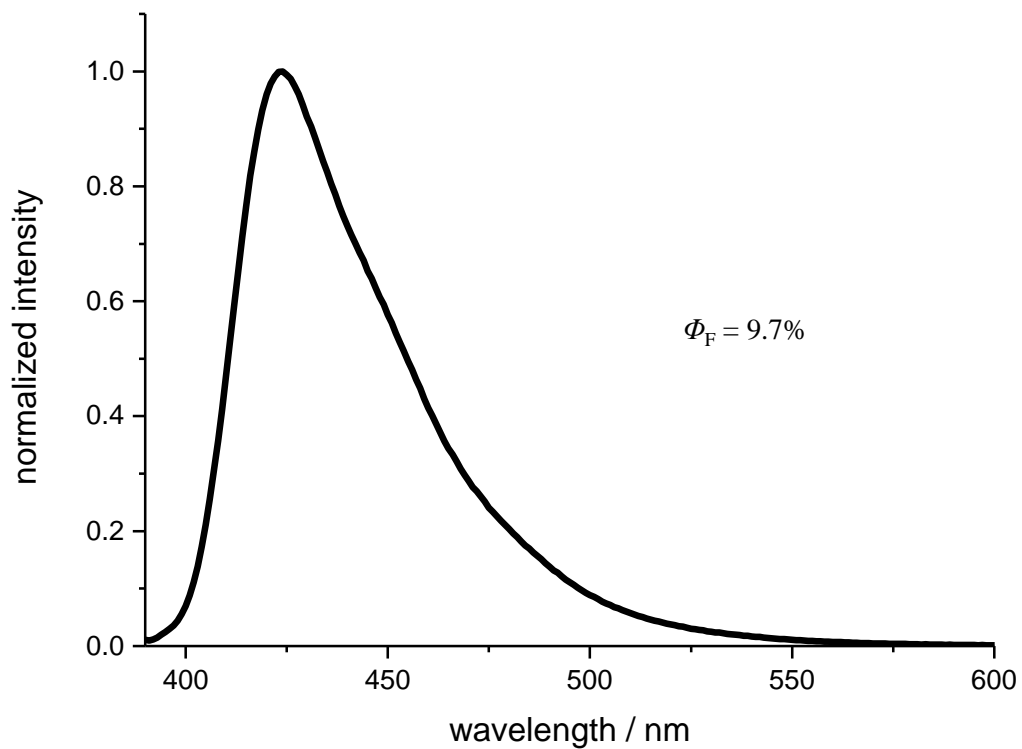

**Figure S27.** Normalized emission spectra of **9** in dichloromethane (concentration: 5  $\mu$ M).

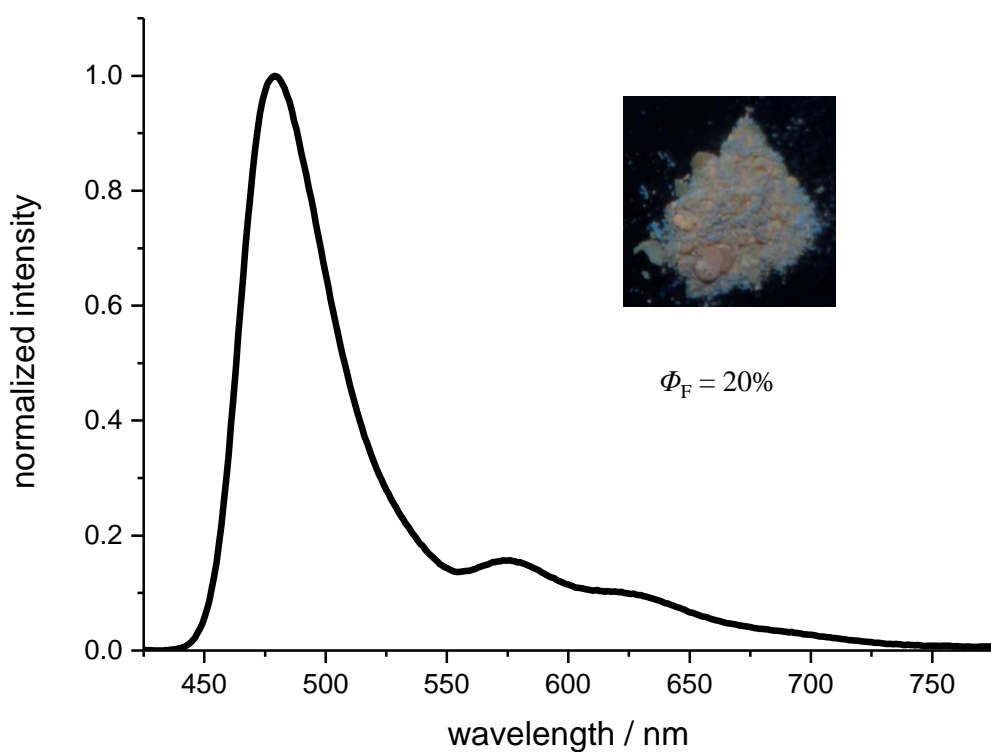

**Figure S28.** Normalized emission spectra of **9** in solid state.

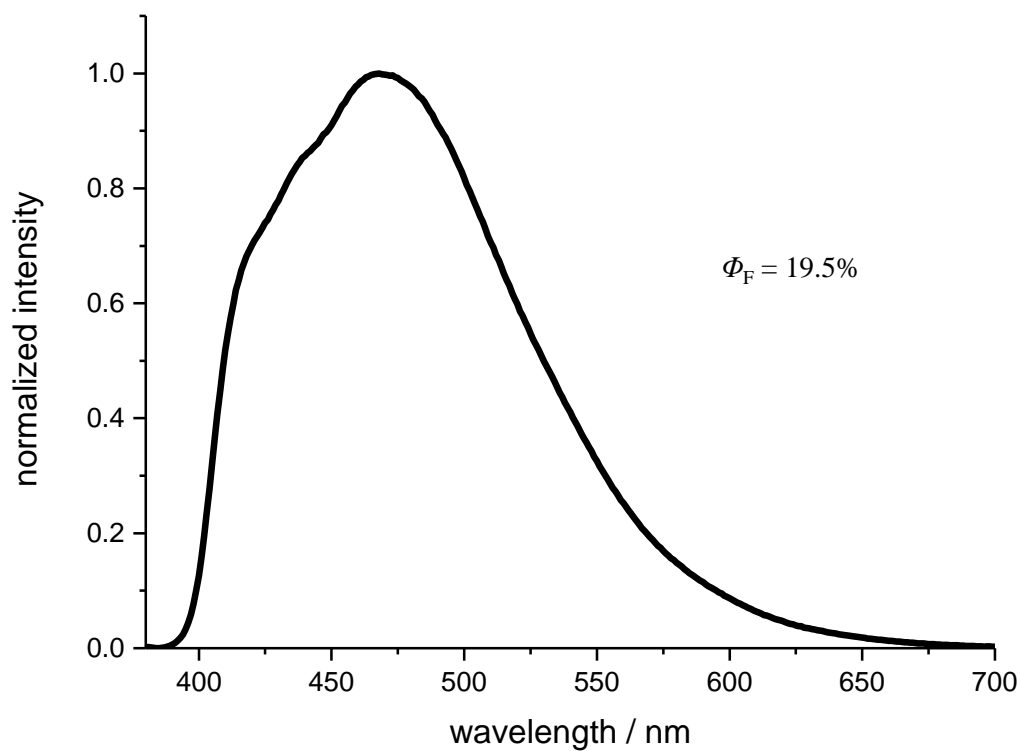

**Figure S29.** Normalized emission spectra of **11** in dichloromethane (concentration: 5  $\mu\text{M}$ ).

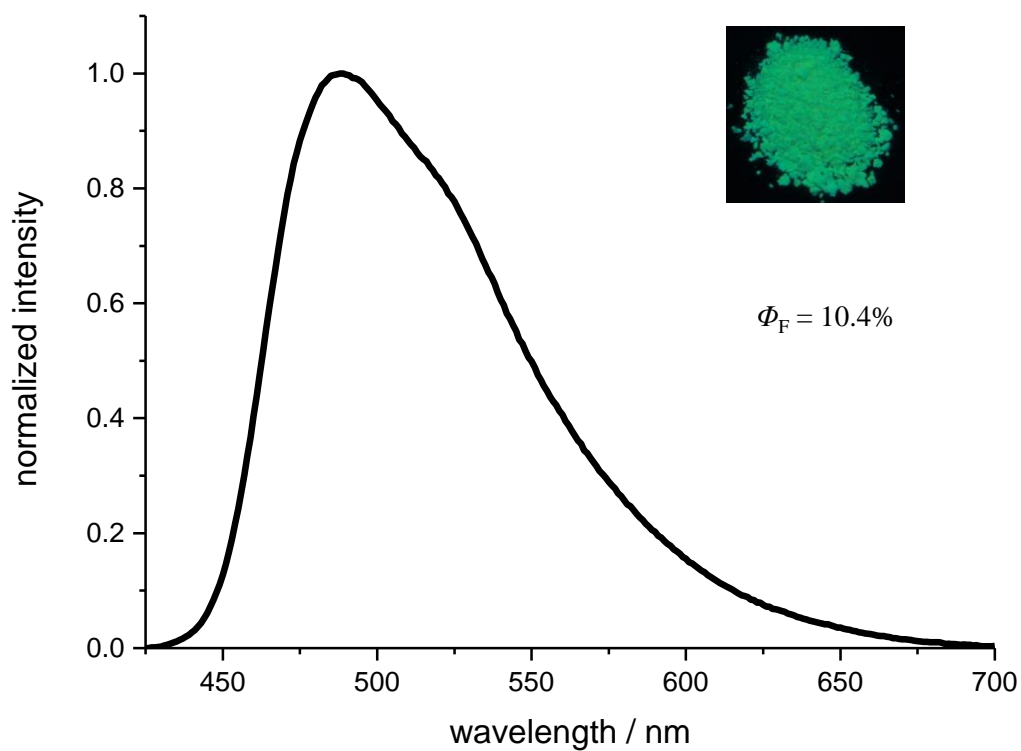

**Figure S30.** Normalized emission spectra of **11** in solid state.



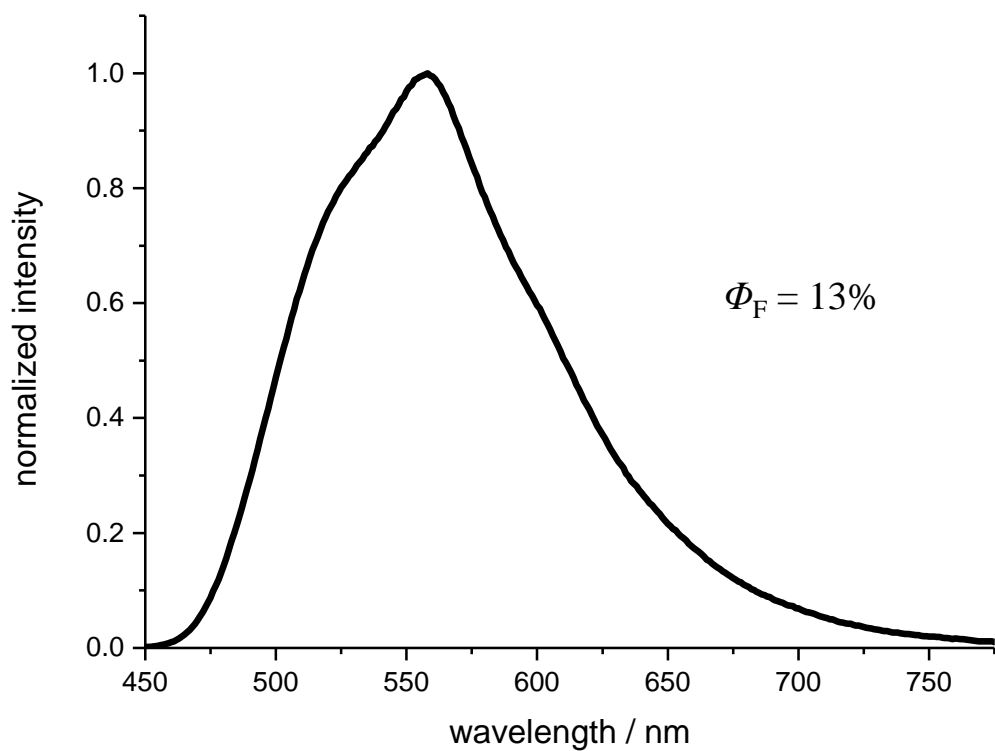

**Figure S31.** Normalized emission spectra of **2** in dichloromethane (concentration: 5  $\mu\text{M}$ ).

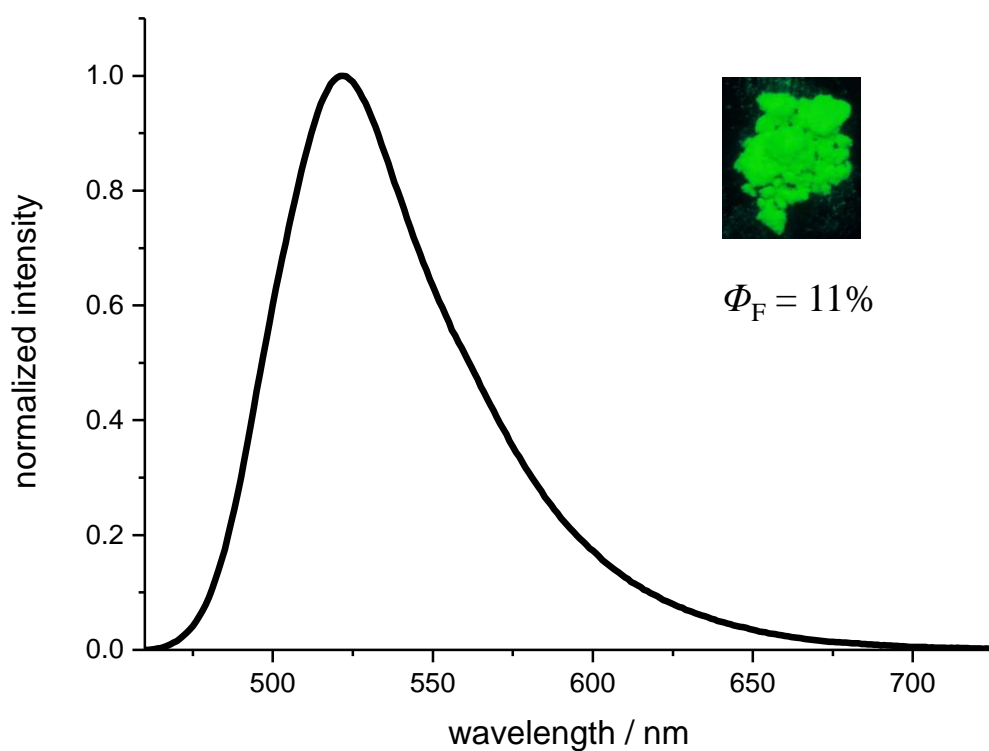

**Figure S32.** Normalized emission spectra of **2** in solid state.

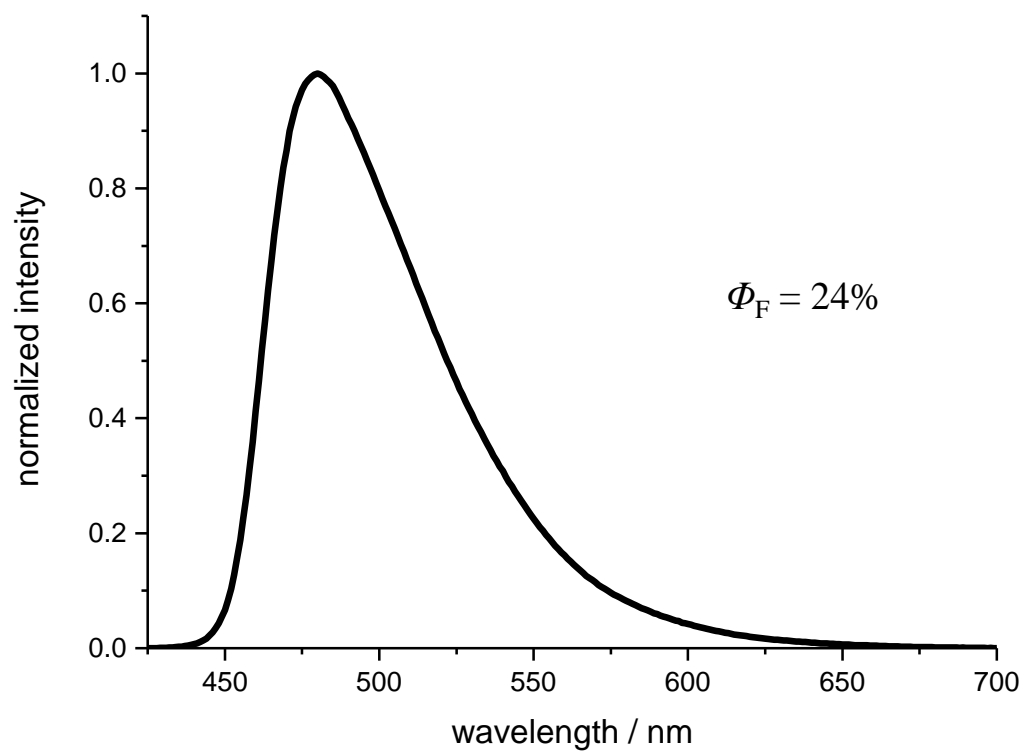

**Figure S33.** Normalized emission spectra of **3** in dichloromethane (concentration: 5  $\mu\text{M}$ ).

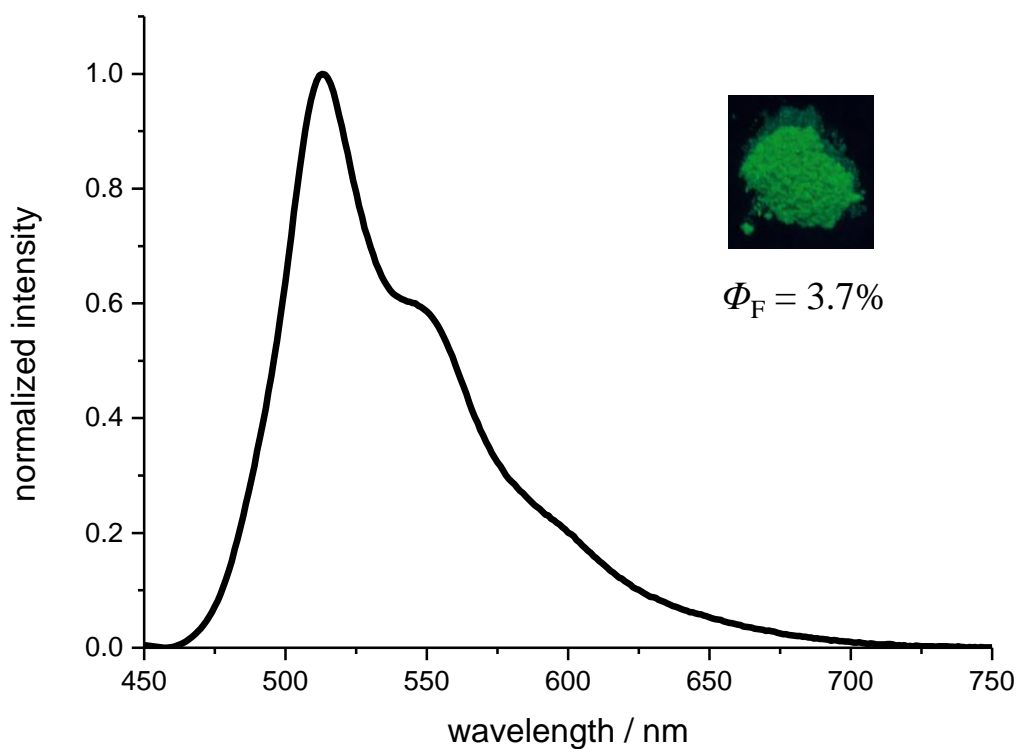

**Figure S34.** Normalized emission spectra of **3** in solid state.

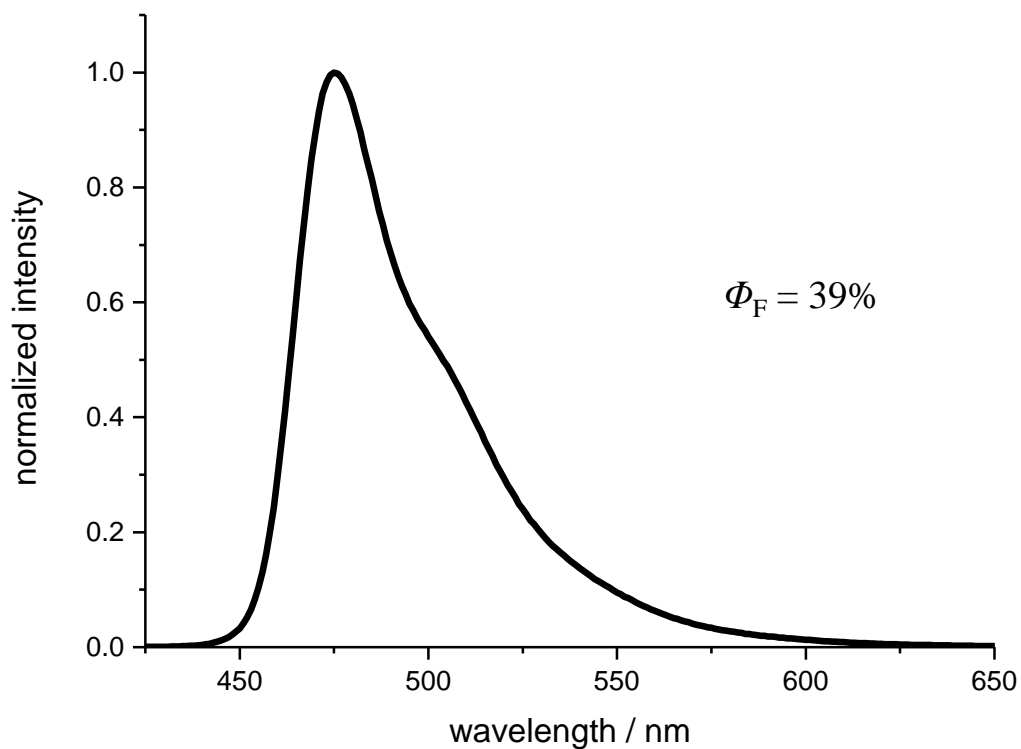

**Figure S35.** Normalized emission spectra of **4** in dichloromethane (concentration: 5  $\mu\text{M}$ ).

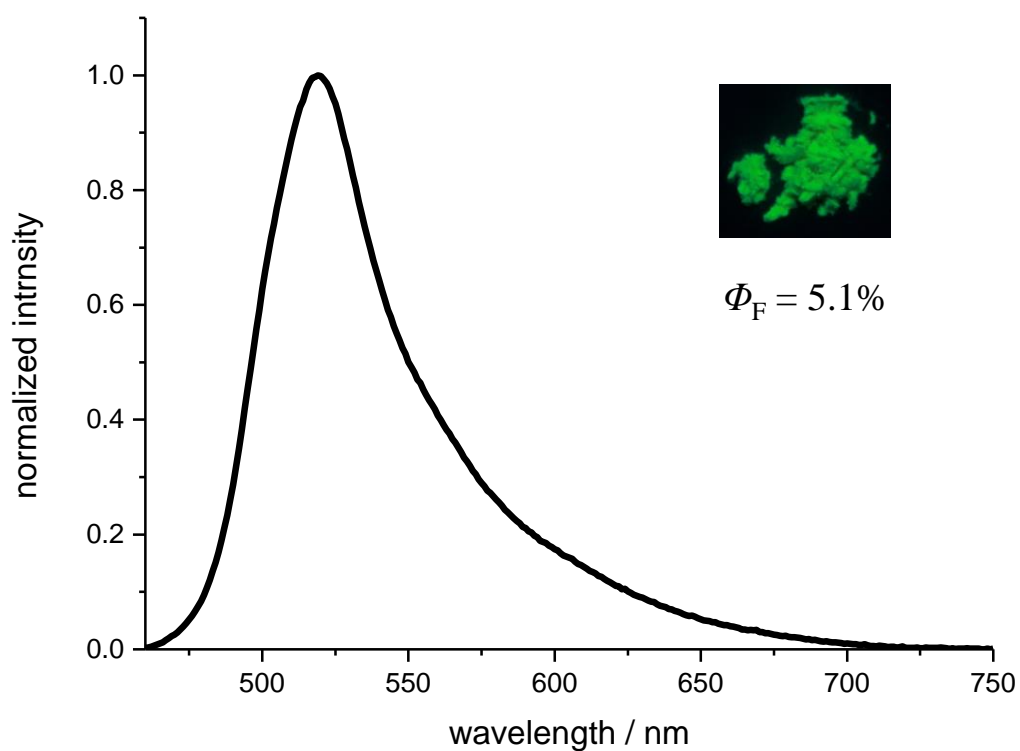

**Figure S36** Normalized emission spectra of **4** in solid state.

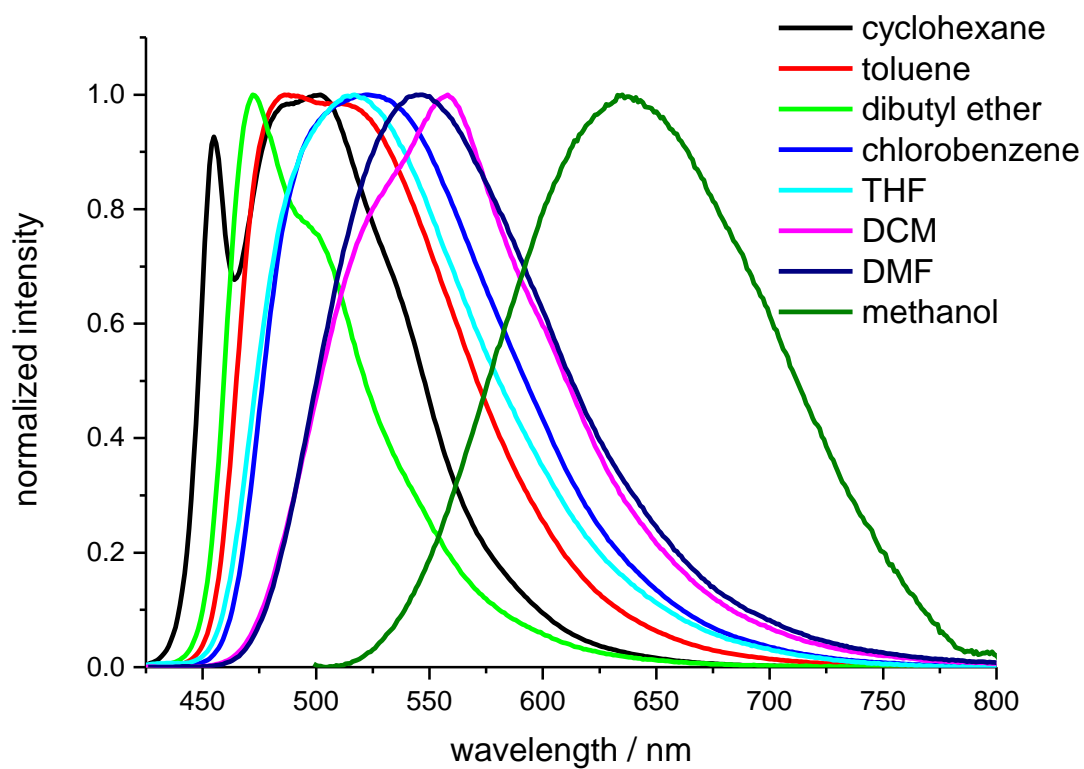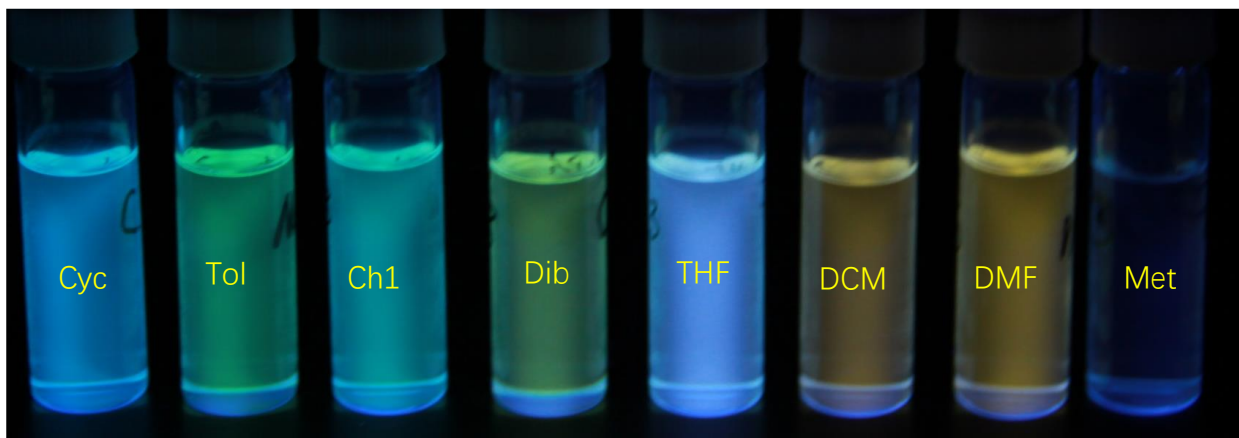

**Figure S37.** Normalized emission spectra of **2** in different solvents at room temperature, concentration: 5  $\mu$ M and the photographs of **2** in different solvents under 365 nm UV light.

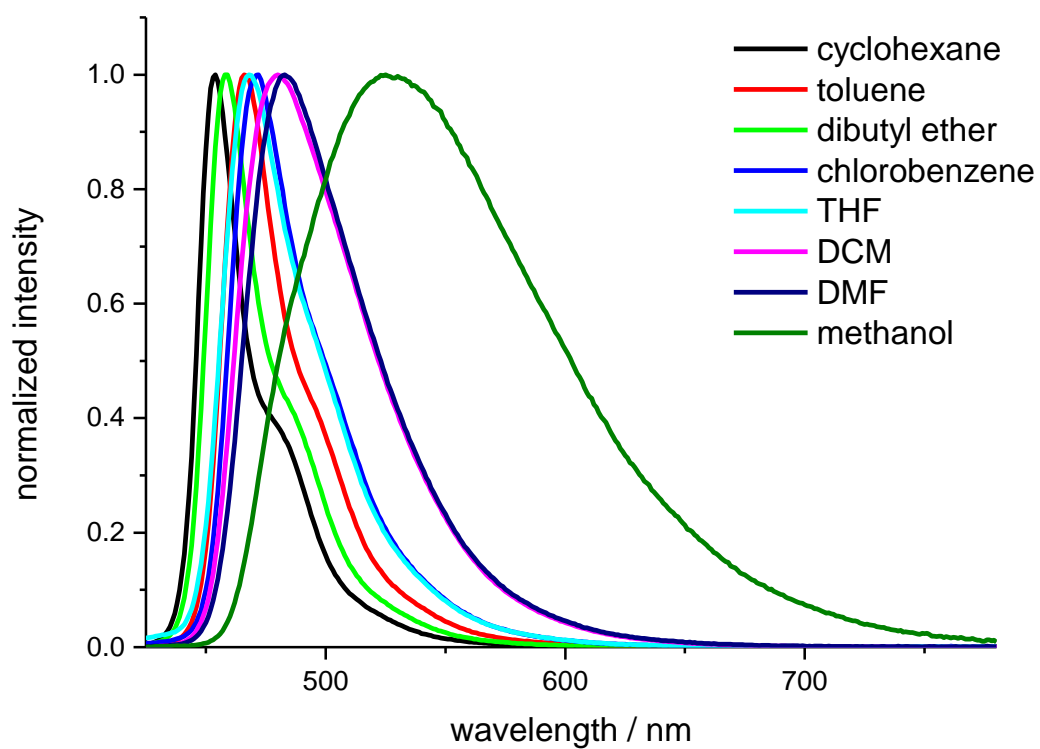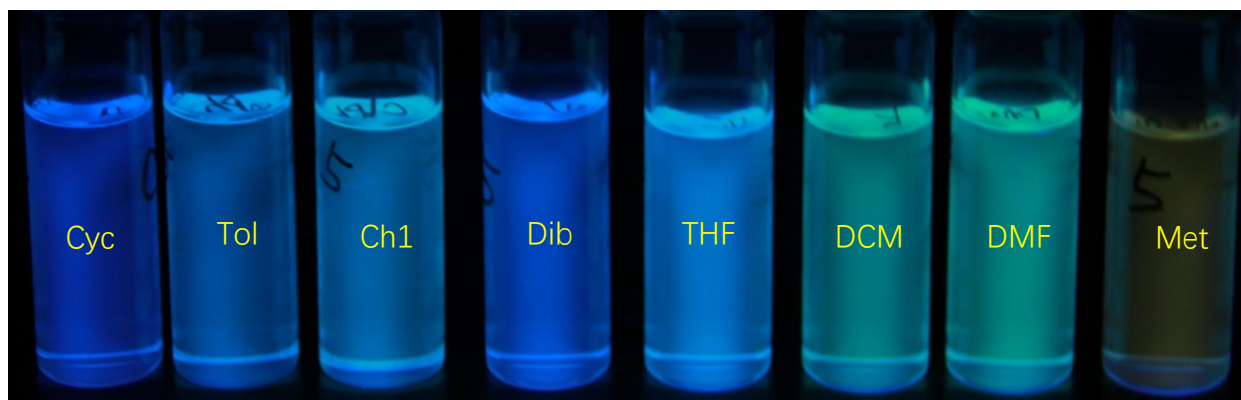

**Figure S38.** Normalized emission spectra of **3** in different solvents at room temperature, concentration: 5  $\mu$ M and the photographs of **3** in different solvents under 365 nm UV light.

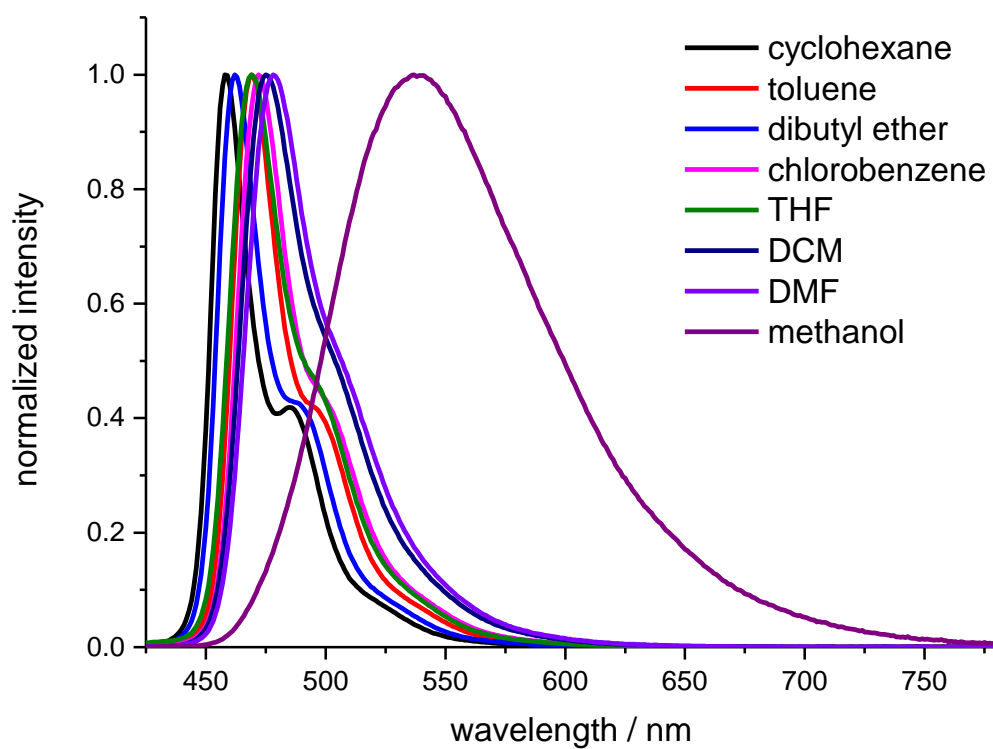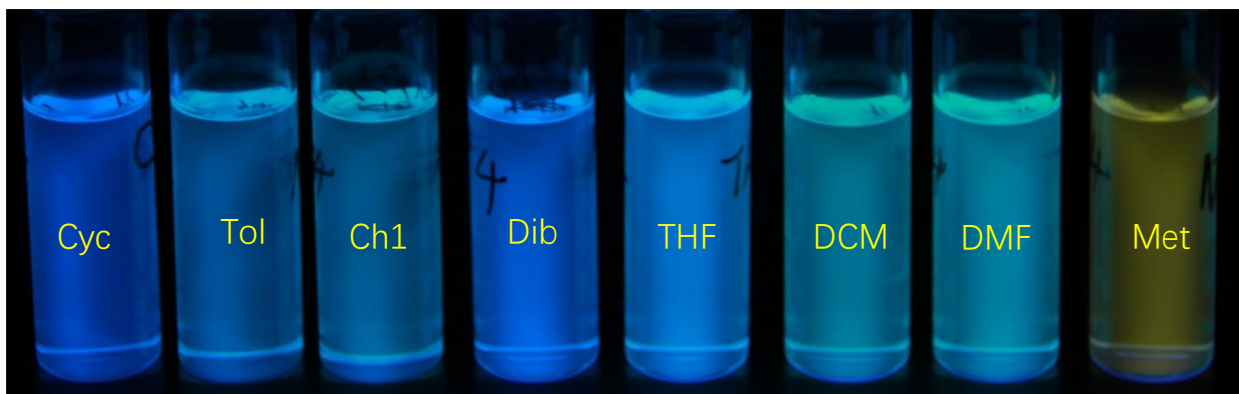

**Figure S39.** Normalized emission spectra of **4** in different solvents at room temperature, concentration: 5  $\mu$ M and the photographs of **4** in different solvents under 365 nm UV light.

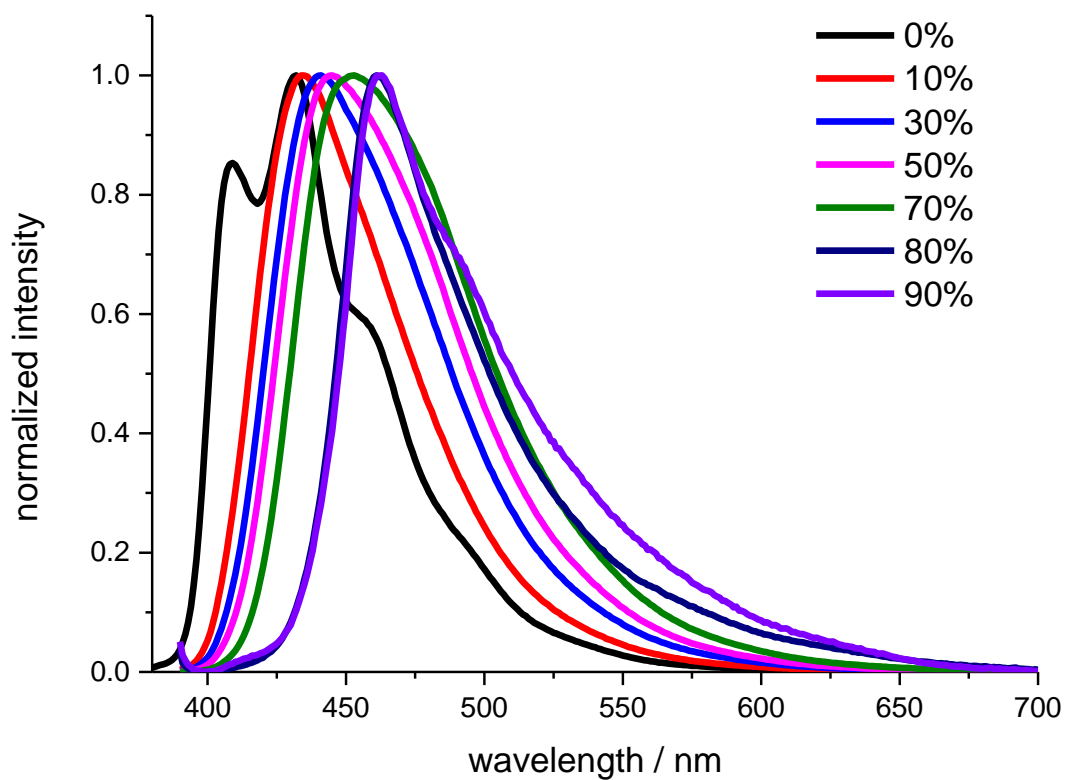

**Figure S40.** Fluorescence emission spectra of **9** in the mixture of water/THF with different water contents. Solutions concentration: 10  $\mu$ M.

## 5. Fluorescence decay curves

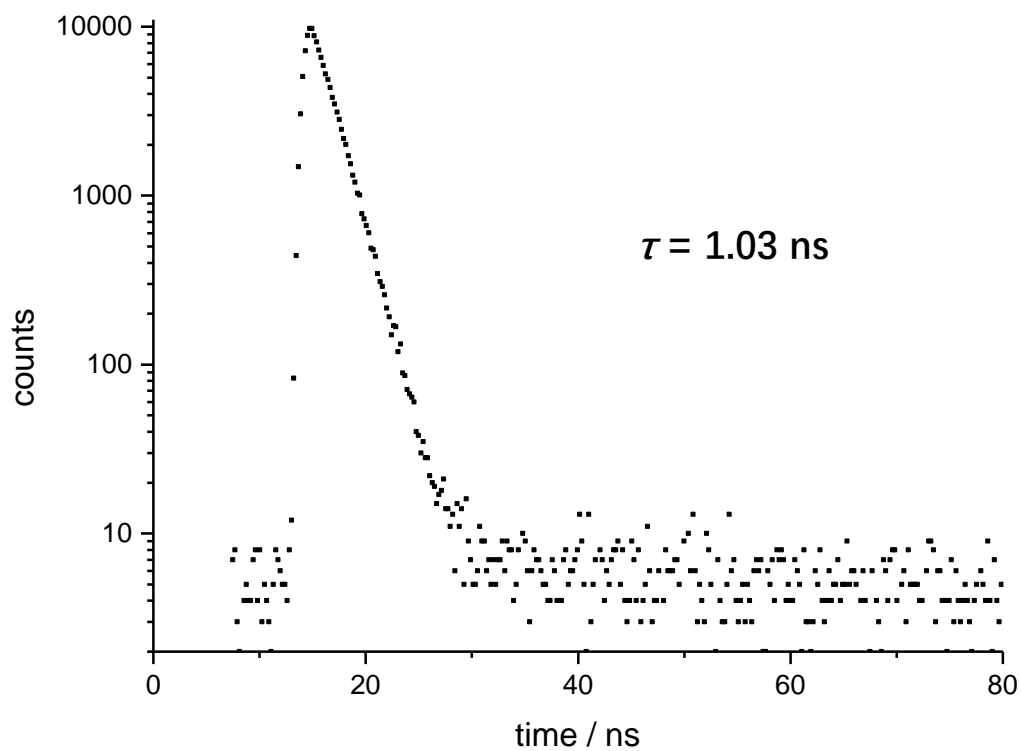

**Figure S41.** Fluorescence decay curve of **9** in dichloromethane at room temperature (concentration: 5  $\mu\text{M}$ ).

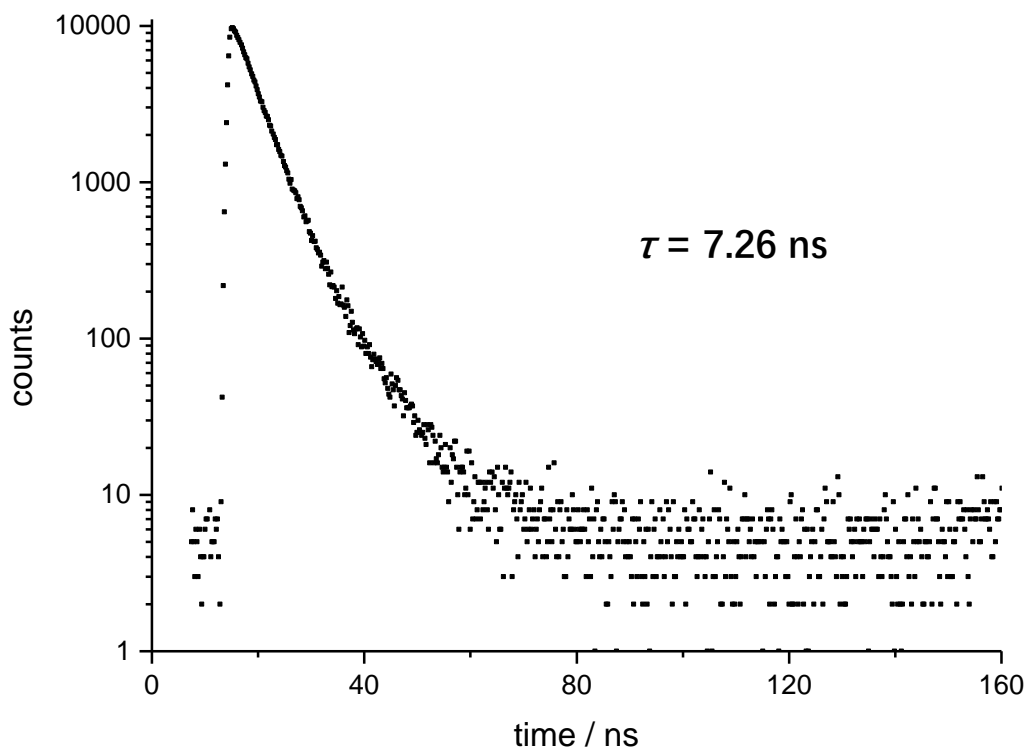

**Figure S42.** Fluorescence decay curve of **9** in solid state at room temperature .



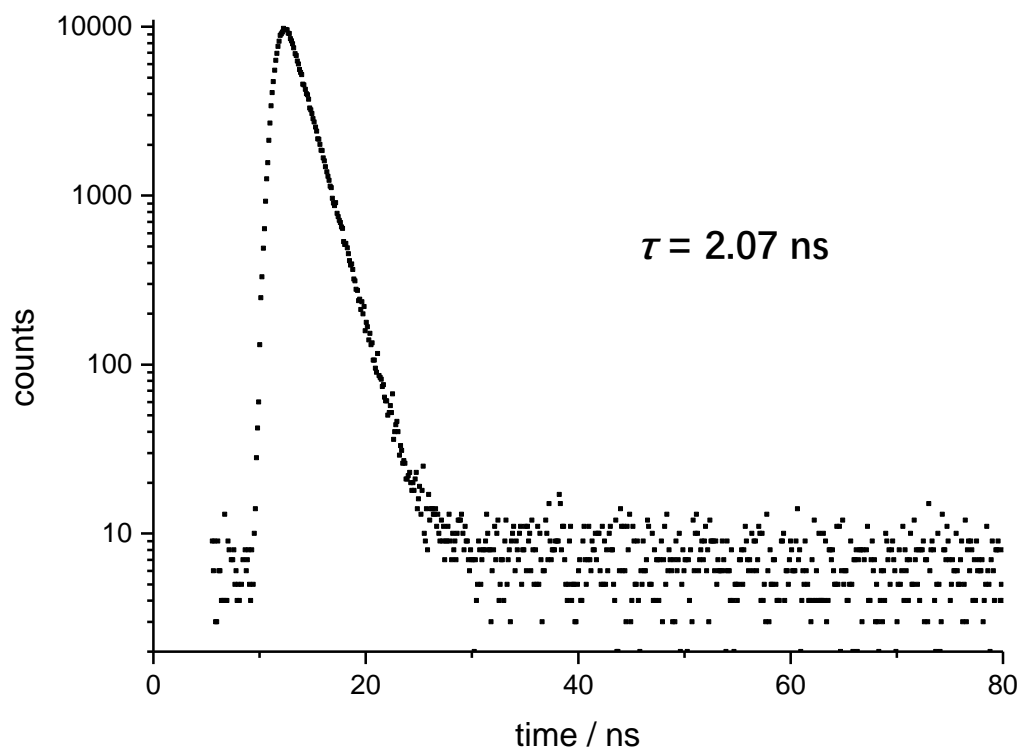

**Figure S43.** Fluorescence decay curve of **11** in dichloromethane at room temperature (concentration: 5  $\mu\text{M}$ ).

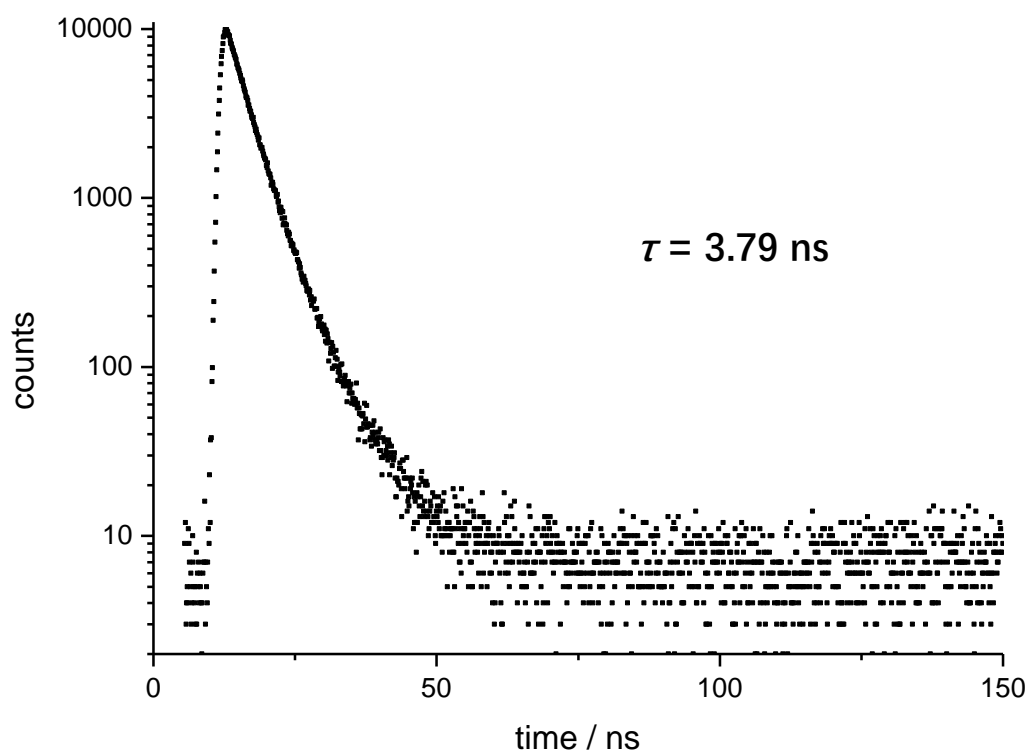

**Figure S44.** Fluorescence decay curve of **11** in solid state at room temperature.

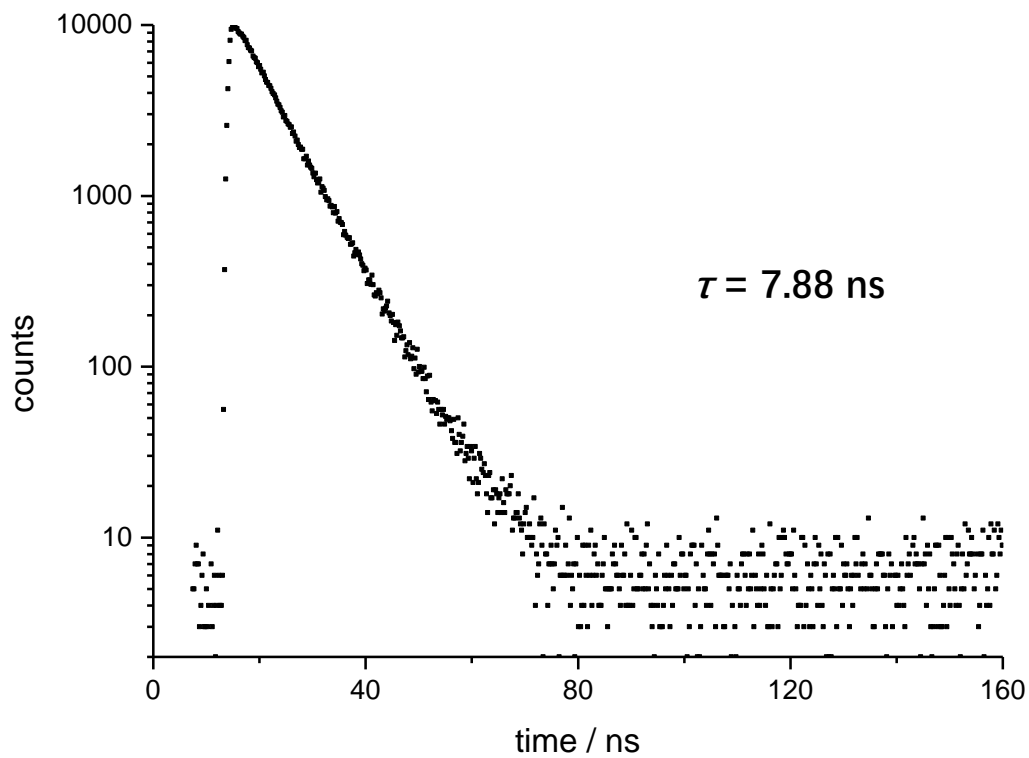

**Figure S45.** Fluorescence decay curve of **2** in dichloromethane at room temperature (concentration: 5  $\mu$ M).

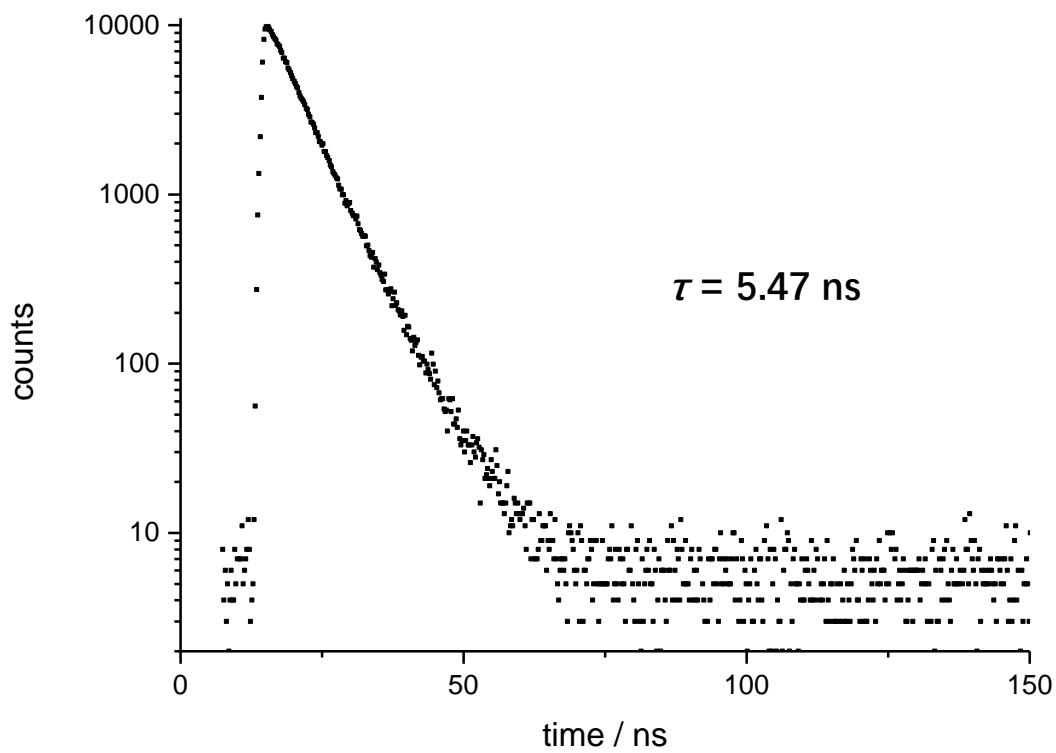

**Figure S46.** Fluorescence decay curve of **2** in solid state at room temperature.

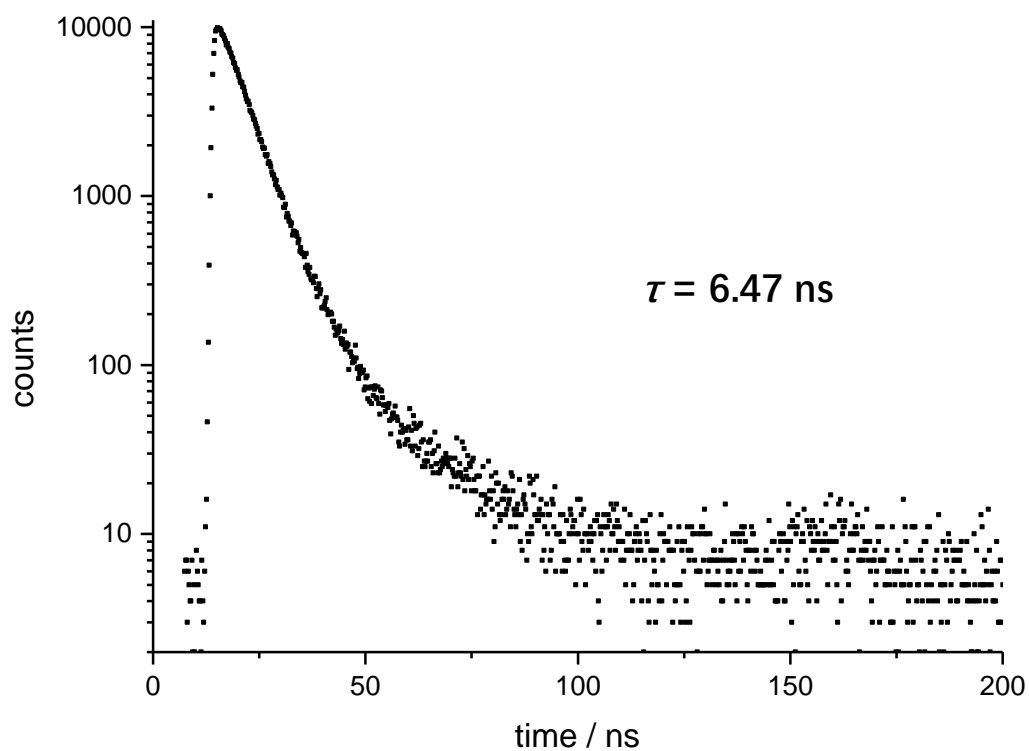

**Figure S47.** Fluorescence decay curve of **3** in dichloromethane at room temperature (concentration: 5  $\mu\text{M}$ ).

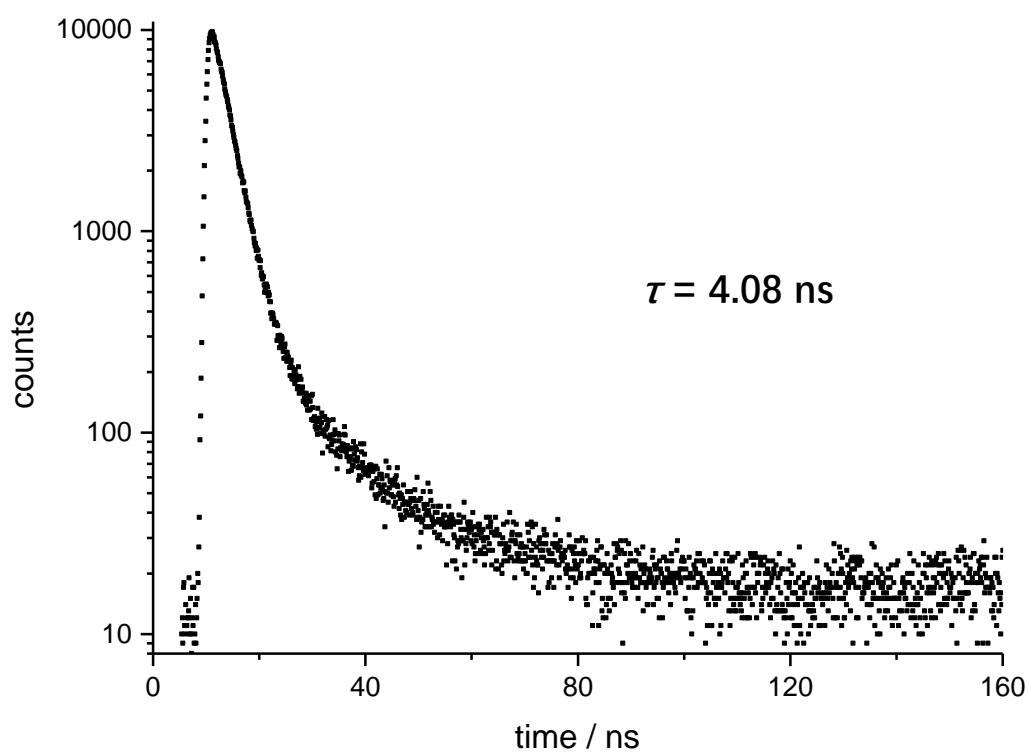

**Figure S48.** Fluorescence decay curve of **3** in solid state at room temperature.

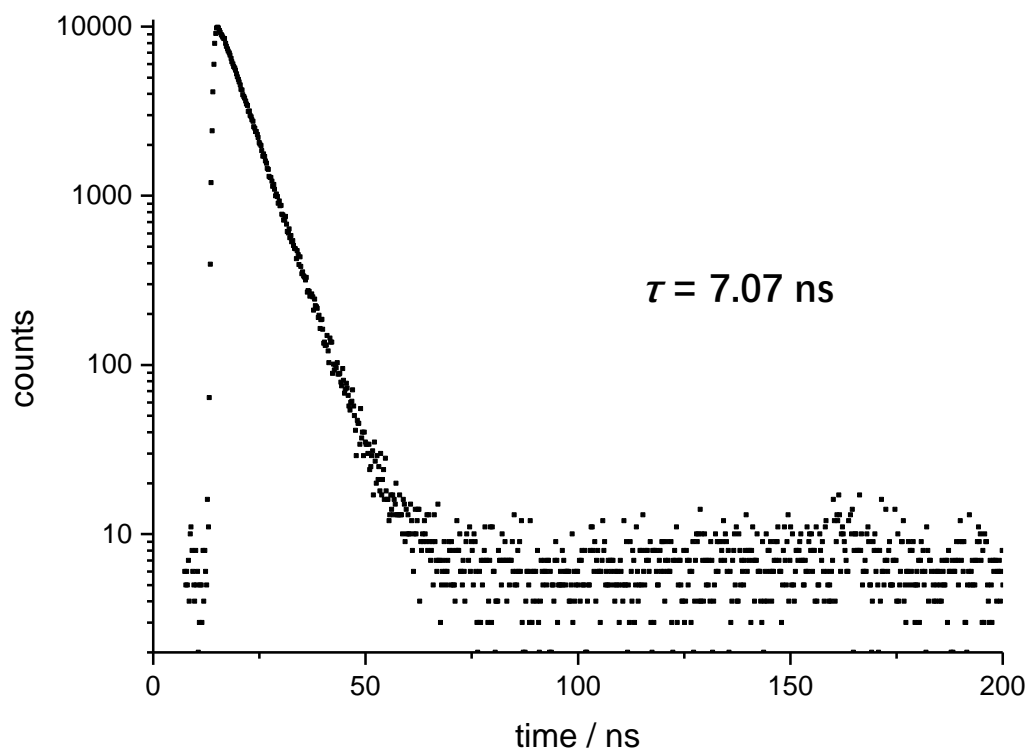

**Figure S49.** Fluorescence decay curve of **4** in dichloromethane at room temperature (concentration: 5  $\mu\text{M}$ ).

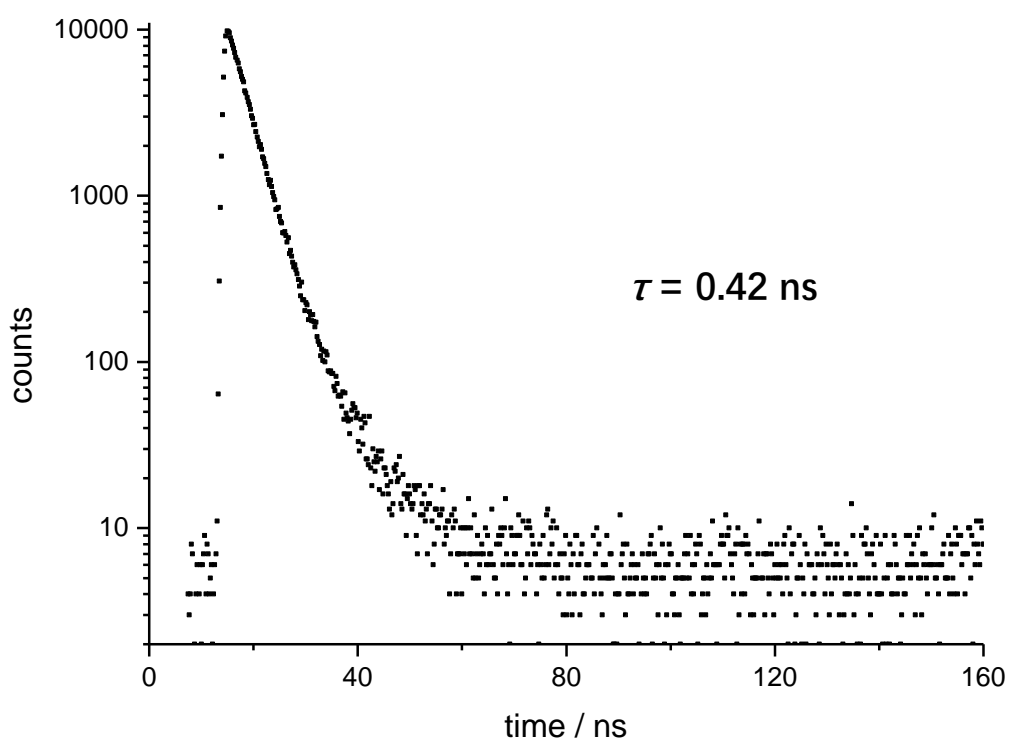

**Figure S50.** Fluorescence decay curve of **4** in solid state at room temperature.

## 6. UV/vis absorption spectra

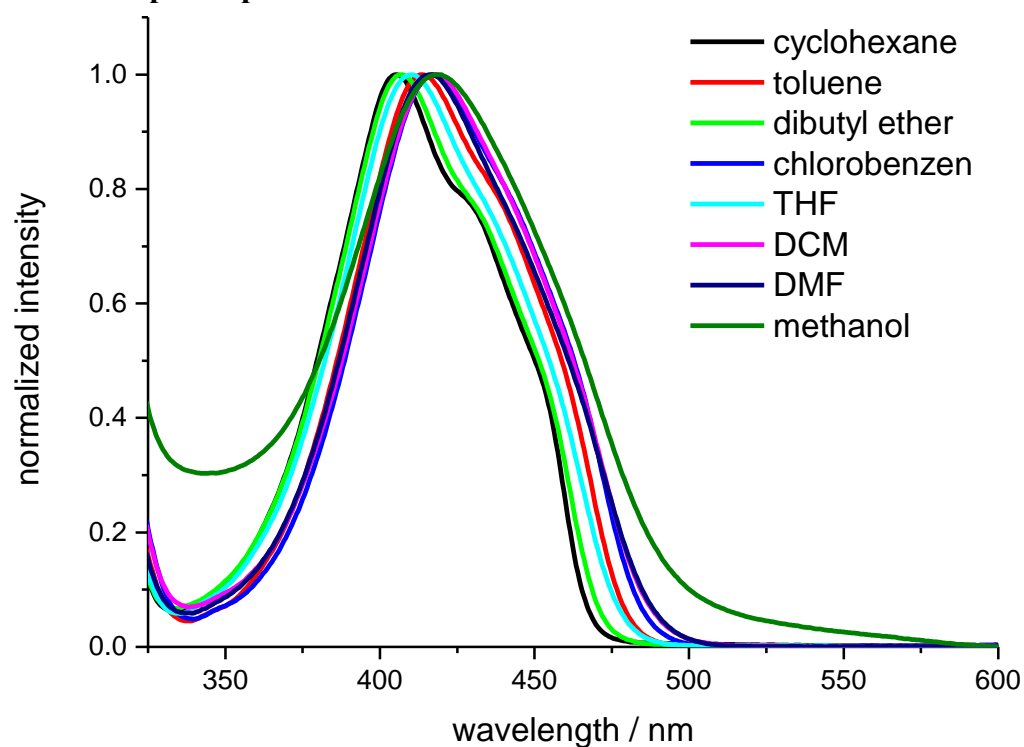

**Figure S51.** Normalized absorption spectra of **2** in different solvents at room temperature. Solutions concentration: 5  $\mu\text{M}$ .

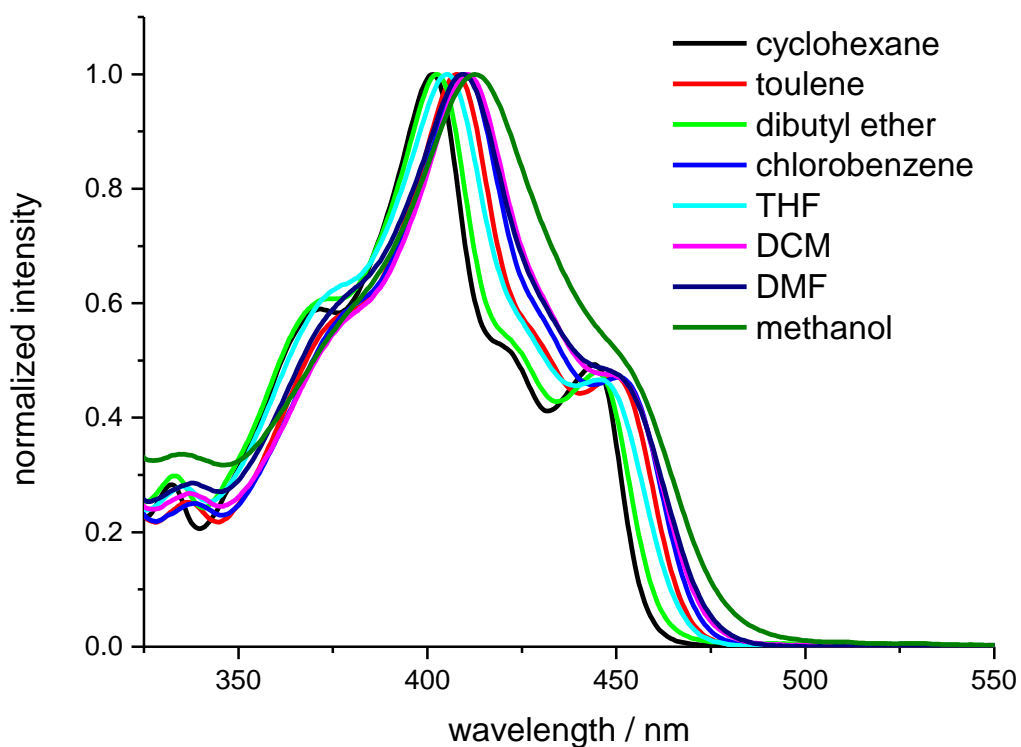

**Figure S52.** Normalized absorption spectra of **3** in different solvents at room temperature. Solutions concentration: 5  $\mu\text{M}$ .

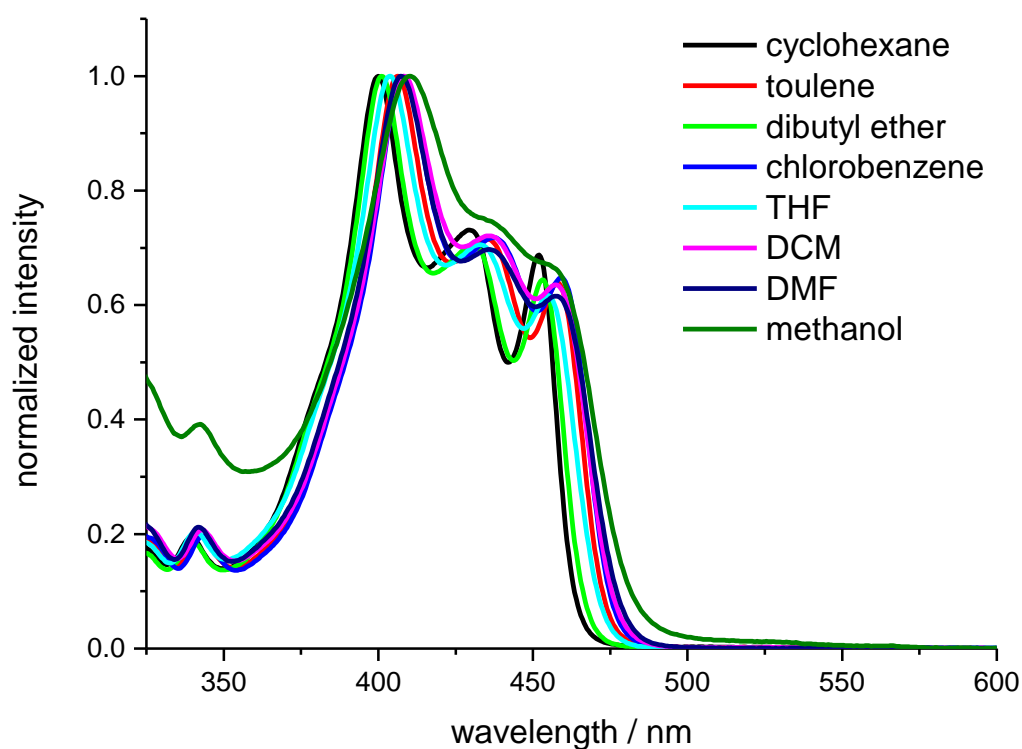

**Figure S53.** Normalized absorption spectra of **4** in different solvents at room temperature. Solutions concentration: 5  $\mu\text{M}$ .

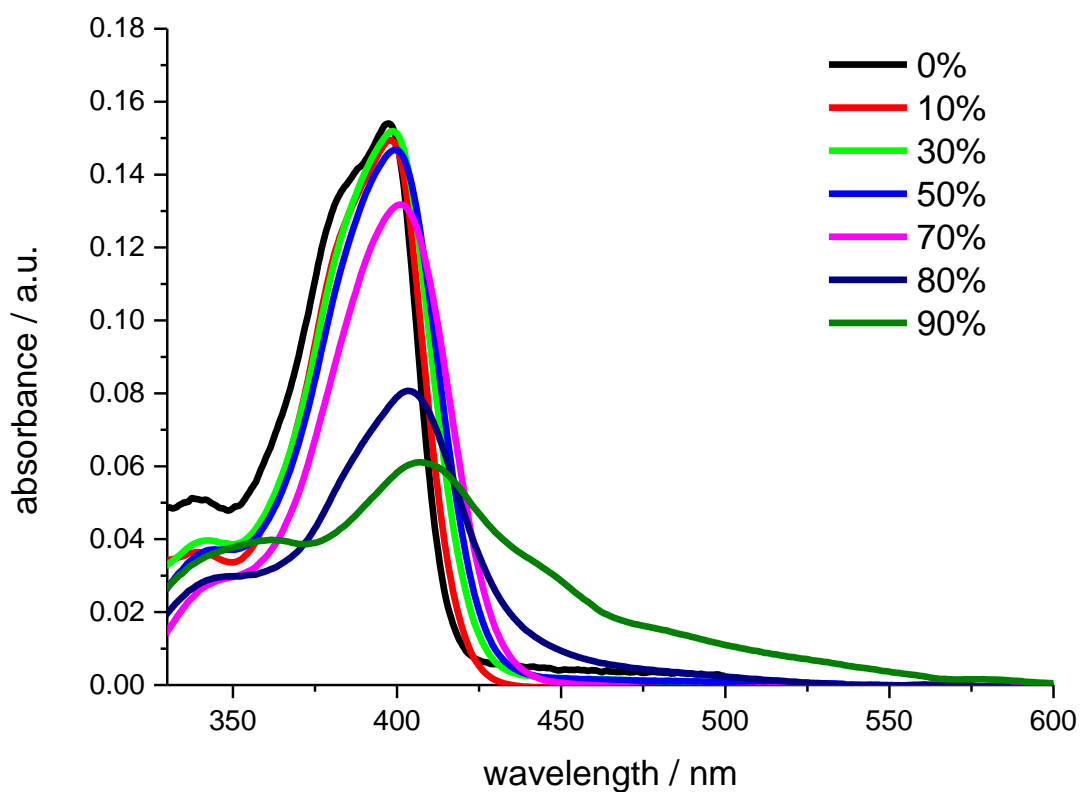

**Figure S54.** UV/vis absorption spectra of **9** in the mixture of water/THF with different water contents. Solutions concentration: 10  $\mu\text{M}$ .

## 7. Lippert–Mataga plots

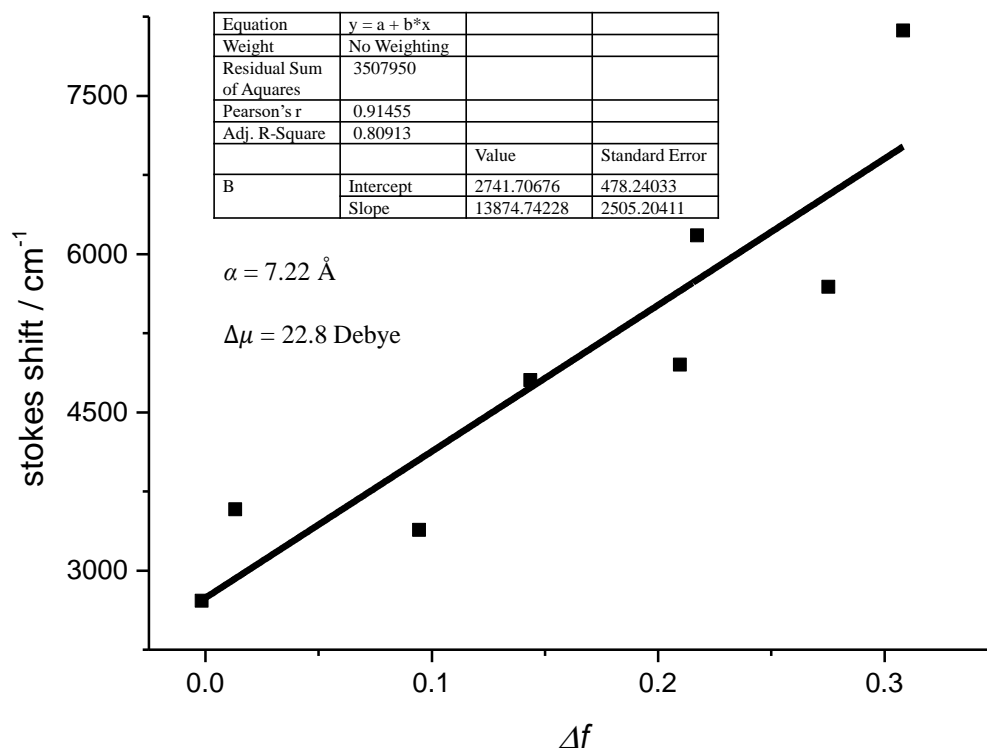

**Figure S55.** Lippert–Mataga plots, Onsager cavity radius and the calculated difference of dipole moments of **2**.

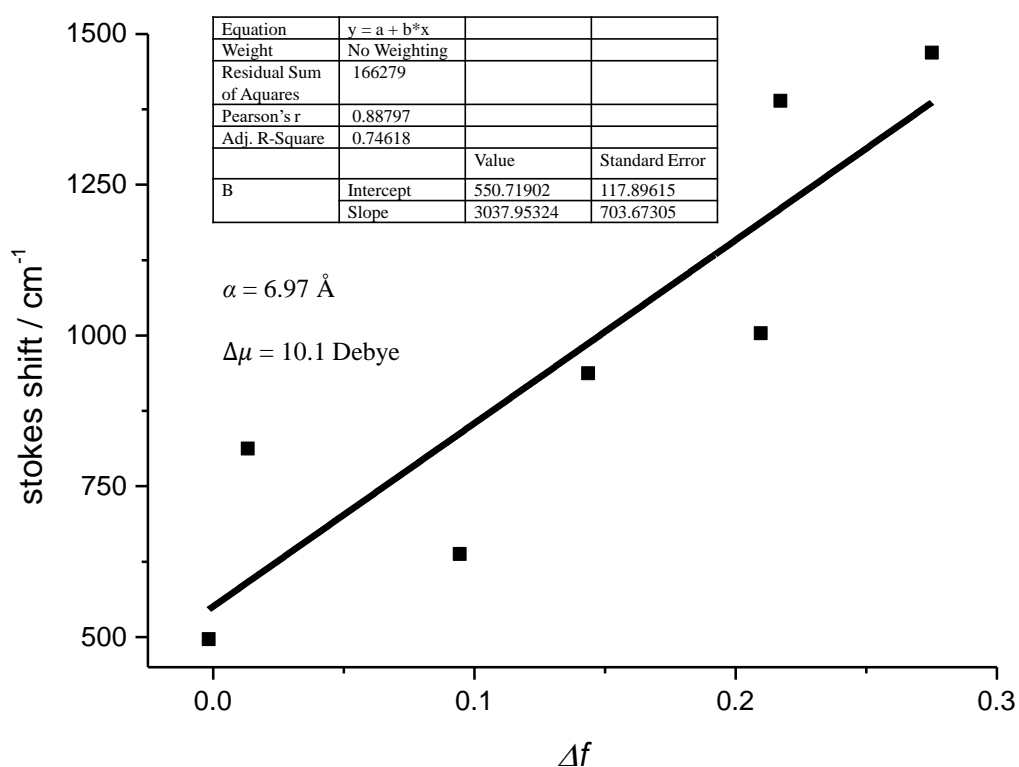

**Figure S56.** Lippert–Mataga plots, Onsager cavity radius and the calculated difference of dipole moments of **3**.

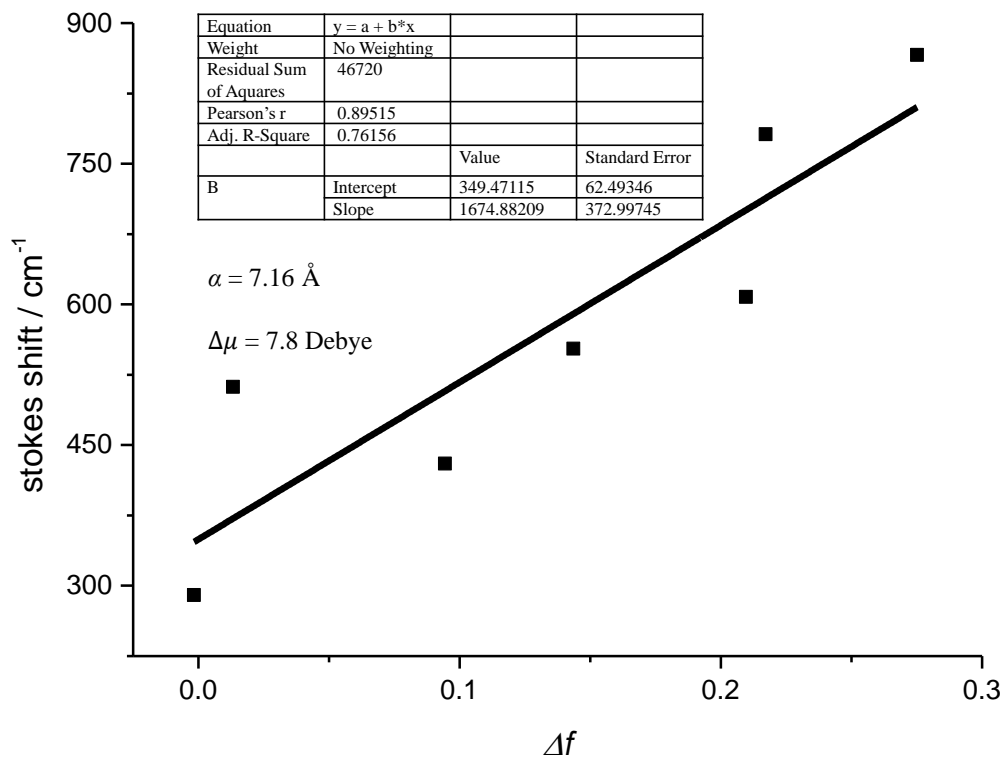

**Figure S57.** Lippert–Mataga plots, Onsager cavity radius and the calculated difference of dipole moments of **4**.



## 8. CV curves

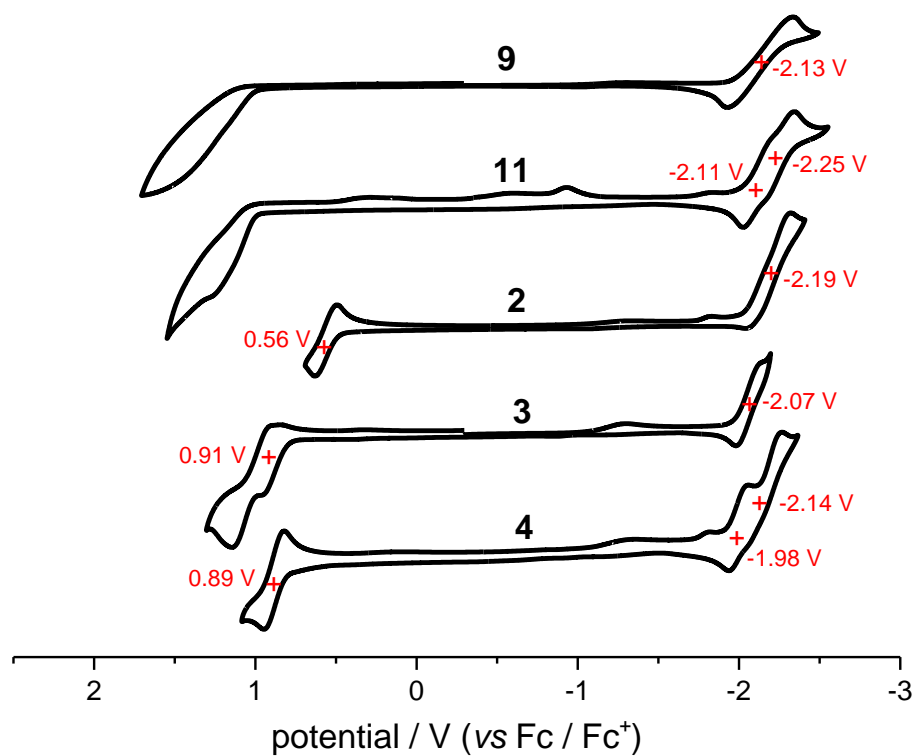

**Figure S58.** CV curves of key intermediates 9, 11 and aza[7]helcenes 2, 3, and 4.

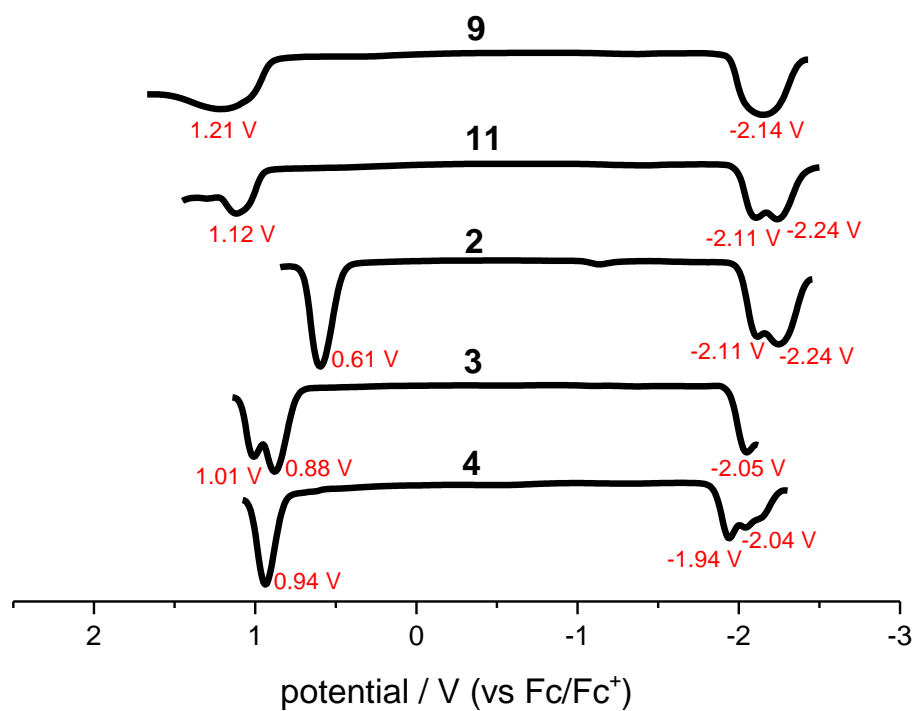

**Figure S59.** DPV curves of key intermediates 9, 11 and aza[7]helcenes 2, 3, and 4.

## 9. Chiral resolution and CD spectra

|                |                                |
|----------------|--------------------------------|
| Column         | : CHIRALPAK IE-3(IE30CE-UL006) |
| Column size    | : 0.46 cm I.D. × 15 cm L       |
| Injection      | : 4 ul                         |
| Mobile phase   | : Hexane/EtOAc=50/50(V/V)      |
| Flow rate      | : 1.0 ml/min                   |
| Wave length    | : UV 254 nm                    |
| Temperature    | : 35 °C                        |
| HPLC equipment | : Shimadzu LC-20AD CP-HPLC-08  |
| Sample name    | : Raw Material                 |

<Chromatogram>

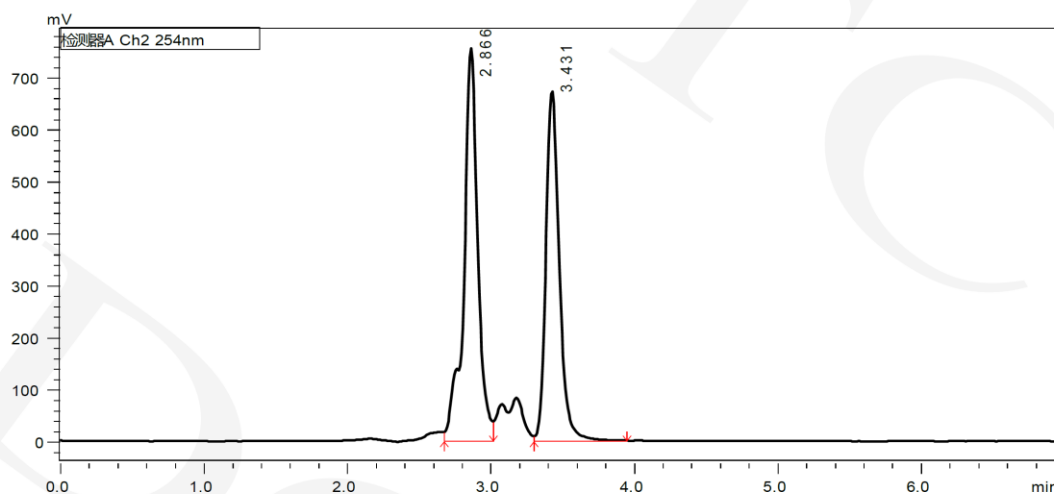

<Peak Table>

| Peak# | Ret. Time | Area    | Area%  | T.Plake# | Tailing F. | Resolution |
|-------|-----------|---------|--------|----------|------------|------------|
| 1     | 2.866     | 5069019 | 53.829 | 4514     | 0.967      | --         |
| 2     | 3.431     | 4347856 | 46.171 | 5971     | 1.242      | 3.243      |

**Figure S60.** Chiral chromatography report of aza[7]helicene **3**.

|                |                                |            |
|----------------|--------------------------------|------------|
| Column         | : CHIRALPAK IE-3(IE30CE-UL006) |            |
| Column size    | : 0.46 cm I.D. × 15 cm L       |            |
| Injection      | : 4 ul                         |            |
| Mobile phase   | : EtOAc/MeOH=90/10(V/V)        |            |
| Flow rate      | : 1.0 ml/min                   |            |
| Wave length    | : UV 254 nm                    |            |
| Temperature    | : 35 °C                        |            |
| HPLC equipment | : Shimadzu LC-20AD             | CP-HPLC-08 |
| Sample name    | : Raw Material                 |            |

<Chromatogram>

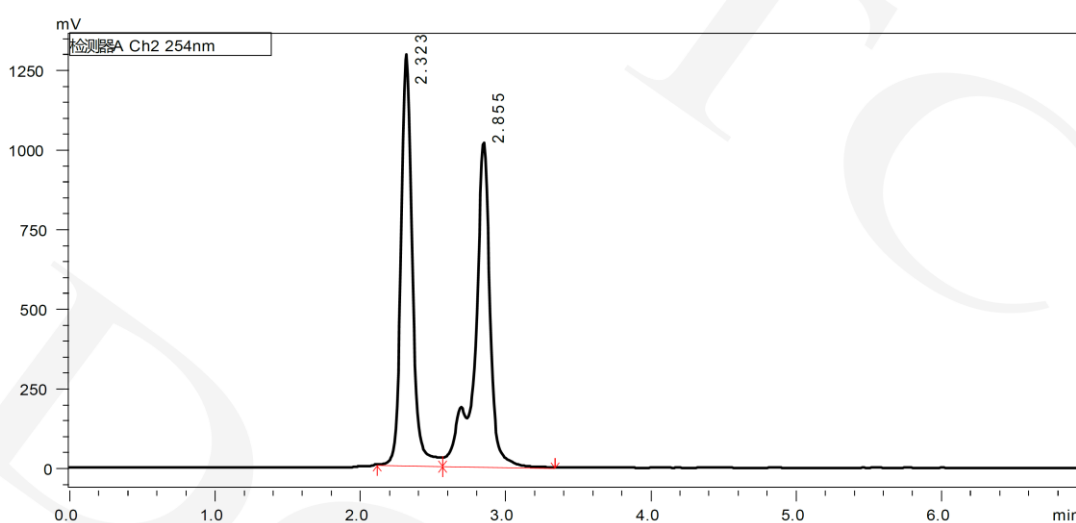

<Peak Table>

| Peak# | Ret. Time | Area    | Area%  | T.Plate# | Tailing F. | Resolution |
|-------|-----------|---------|--------|----------|------------|------------|
| 1     | 2.323     | 6984060 | 48.682 | 3788     | 1.152      | --         |
| 2     | 2.855     | 7362231 | 51.318 | 4579     | 0.749      | 3.331      |

**Figure S61.** Chiral chromatography report of aza[7]helicene **4**.

|                |                                |            |
|----------------|--------------------------------|------------|
| Column         | : CHIRALPAK IE-3(IE30CE-UL006) |            |
| Column size    | : 0.46 cm I.D. × 15 cm L       |            |
| Injection      | : 4 ul                         |            |
| Mobile phase   | : Hexane/EtOAc=50/50(V/V)      |            |
| Flow rate      | : 1.0 ml/min                   |            |
| Wave length    | : UV 254 nm                    |            |
| Temperature    | : 35 °C                        |            |
| HPLC equipment | : Shimadzu LC-20AD             | CP-HPLC-08 |
| Sample name    | : Peak 1                       |            |

<Chromatogram>

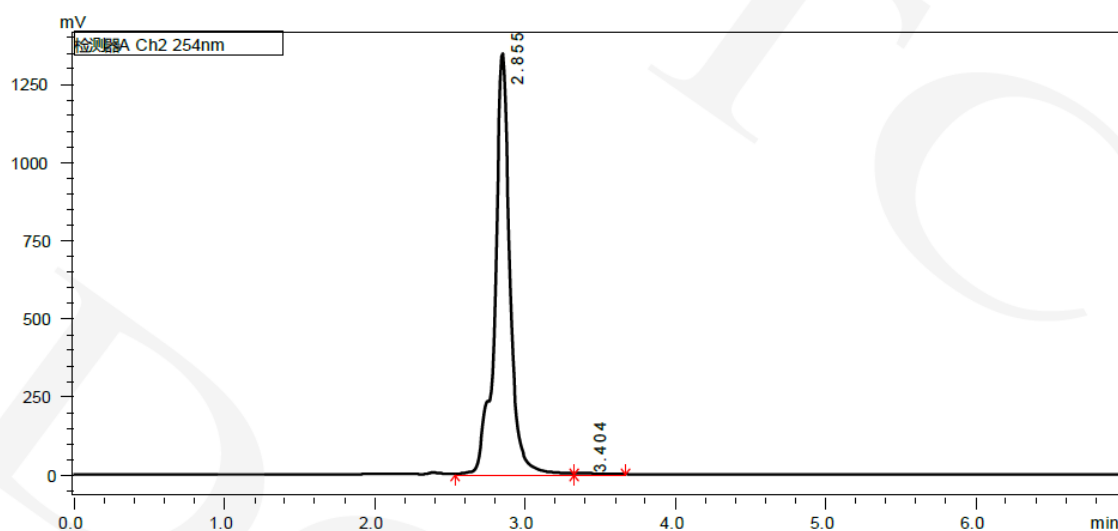

<Peak Table>

| Peak# | Ret. Time | Area    | Area%  | T.Plate# | Tailing F. | Resolution |
|-------|-----------|---------|--------|----------|------------|------------|
| 1     | 2.855     | 9269877 | 99.735 | 4356     | 0.951      | --         |
| 2     | 3.404     | 24663   | 0.265  | 4040     | --         | 2.835      |

**Figure S62.** Chiral chromatography report of the first peak of aza[7]helicene **3**.

|                |                                |            |
|----------------|--------------------------------|------------|
| Column         | : CHIRALPAK IE-3(IE30CE-UL006) |            |
| Column size    | : 0.46 cm I.D. × 15 cm L       |            |
| Injection      | : 4 ul                         |            |
| Mobile phase   | : Hexane/EtOAc=50/50(V/V)      |            |
| Flow rate      | : 1.0 ml/min                   |            |
| Wave length    | : UV 254 nm                    |            |
| Temperature    | : 35 °C                        |            |
| HPLC equipment | : Shimadzu LC-20AD             | CP-HPLC-08 |
| Sample name    | : Peak 2                       |            |

<Chromatogram>

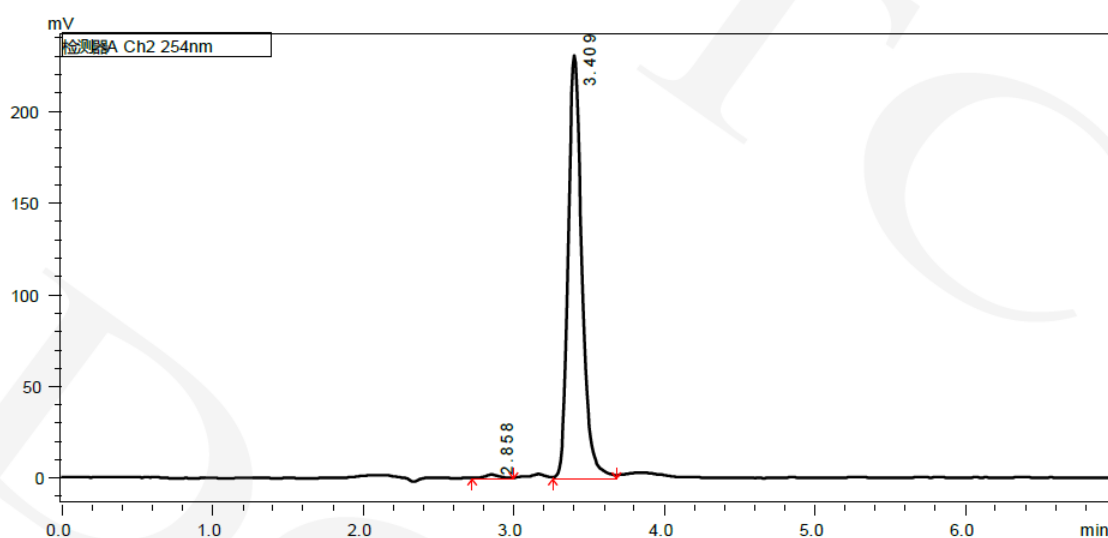

<Peak Table>

| Peak# | Ret. Time | Area    | Area%  | T.Plate# | Tailing F. | Resolution |
|-------|-----------|---------|--------|----------|------------|------------|
| 1     | 2.858     | 8595    | 0.586  | 5412     | 1.126      | --         |
| 2     | 3.409     | 1458897 | 99.414 | 6010     | 1.237      | 3.326      |

**Figure S63.** Chiral chromatography report of the second peak of aza[7]helicene **3**.

|                |                                |            |
|----------------|--------------------------------|------------|
| Column         | : CHIRALPAK IE-3(IE30CE-UL006) |            |
| Column size    | : 0.46 cm I.D. × 15 cm L       |            |
| Injection      | : 4 ul                         |            |
| Mobile phase   | : EtOAc/MeOH=90/10(V/V)        |            |
| Flow rate      | : 1.0 ml/min                   |            |
| Wave length    | : UV 254 nm                    |            |
| Temperature    | : 35 °C                        |            |
| HPLC equipment | : Shimadzu LC-20AD             | CP-HPLC-08 |
| Sample name    | : Peak 1                       |            |

<Chromatogram>

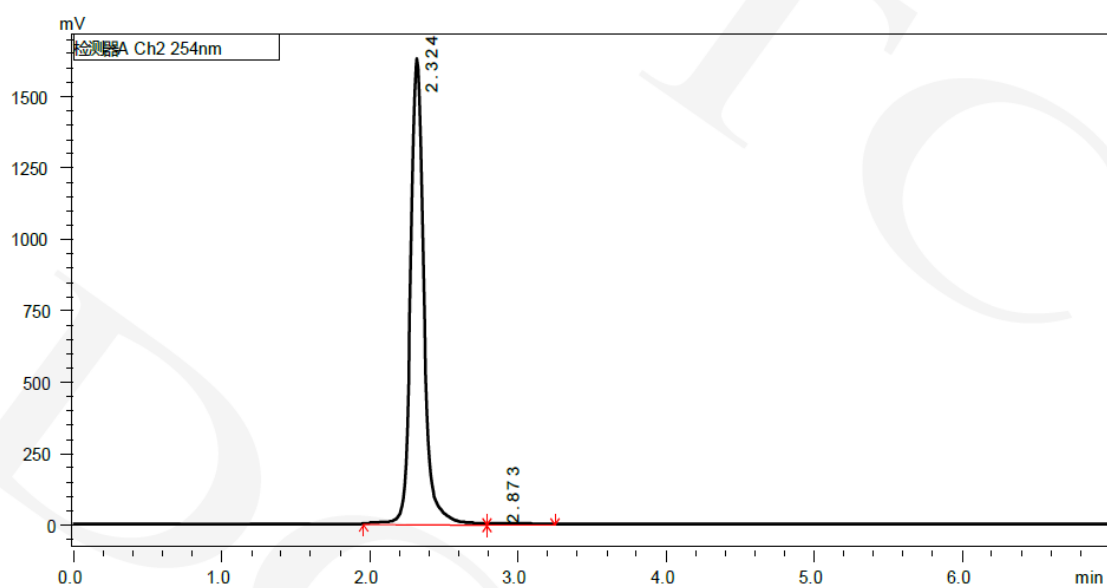

<Peak Table>

| Peak# | Ret. Time | Area    | Area%  | T.Plate# | Tailing F. | Resolution |
|-------|-----------|---------|--------|----------|------------|------------|
| 1     | 2.324     | 1015925 | 99.730 | 3112     | 1.173      |            |
| 2     | 2.873     | 27550   | 0.270  | 1405     |            | 2.316      |

**Figure S64.** Chiral chromatography report of the first peak of aza[7]helicene **4**.

|                |                                |            |
|----------------|--------------------------------|------------|
| Column         | : CHIRALPAK IE-3(IE30CE-UL006) |            |
| Column size    | : 0.46 cm I.D. × 15 cm L       |            |
| Injection      | : 4 ul                         |            |
| Mobile phase   | : EtOAc/MeOH=90/10(V/V)        |            |
| Flow rate      | : 1.0 ml/min                   |            |
| Wave length    | : UV 254 nm                    |            |
| Temperature    | : 35 °C                        |            |
| HPLC equipment | : Shimadzu LC-20AD             | CP-HPLC-08 |
| Sample name    | : Peak 2                       |            |

<Chromatogram>

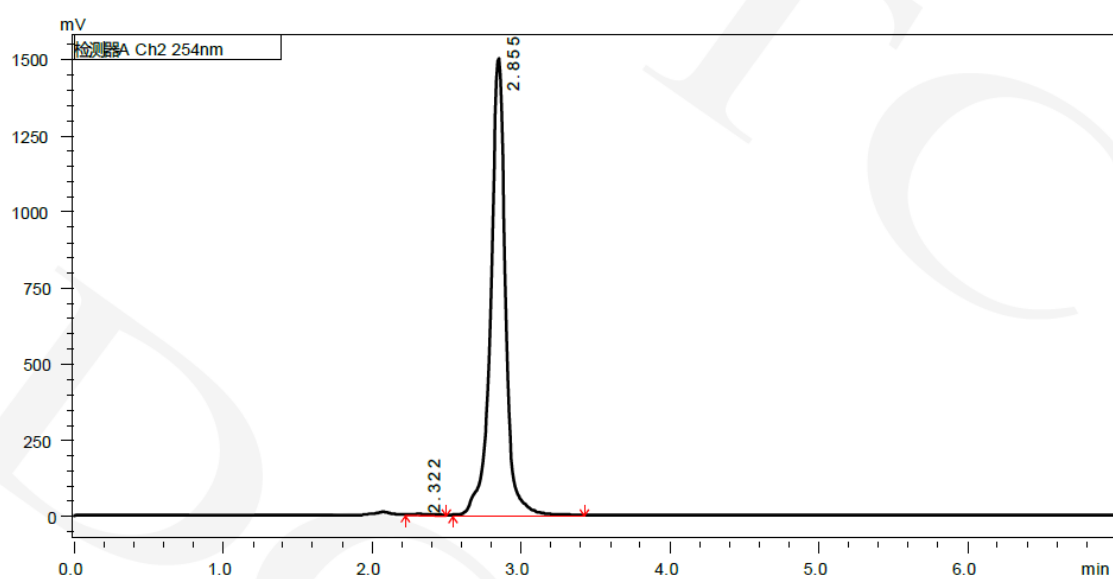

<Peak Table>

| Peak# | Ret. Time | Area     | Area%  | T.Plate# | Tailing F. | Resolution |
|-------|-----------|----------|--------|----------|------------|------------|
| 1     | 2.322     | 15234    | 0.148  | 4150     | 1.750      | --         |
| 2     | 2.855     | 10288555 | 99.852 | 4134     | 0.890      | 3.313      |

**Figure S65.** Chiral chromatography report of the second peak of aza[7]helicene **4**.

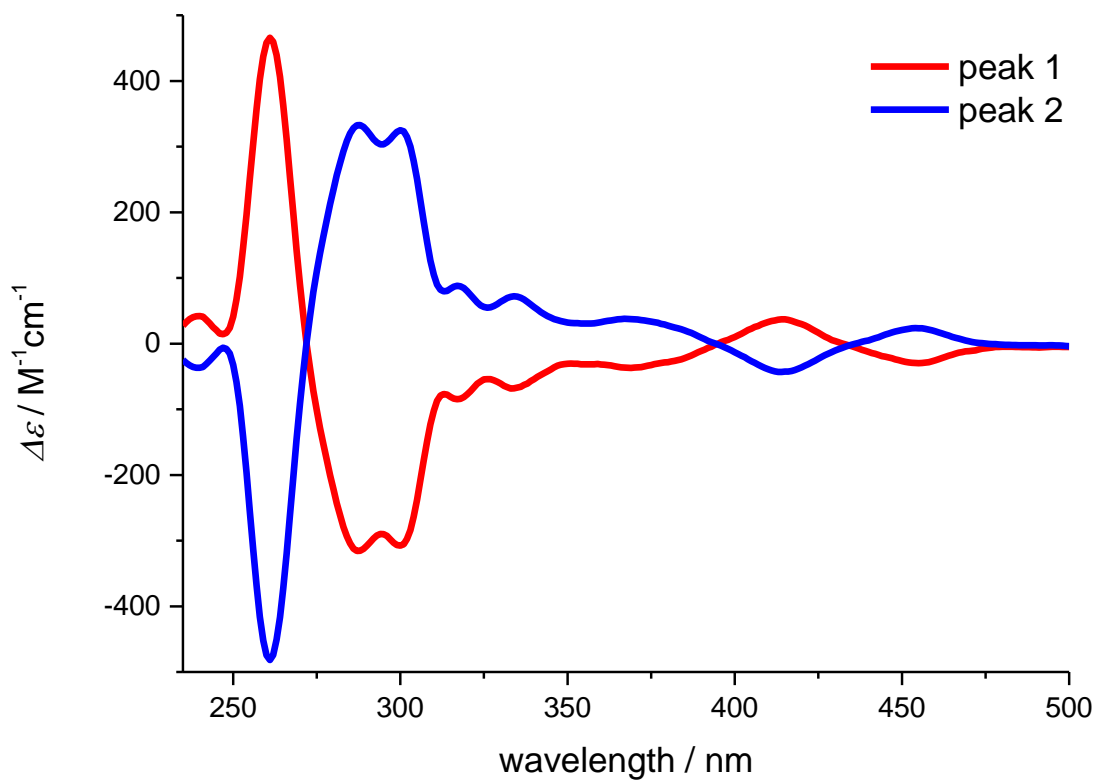

**Figure S66.** CD spectra of the enantiomers of aza[7]helicene **3** in dichloromethane.

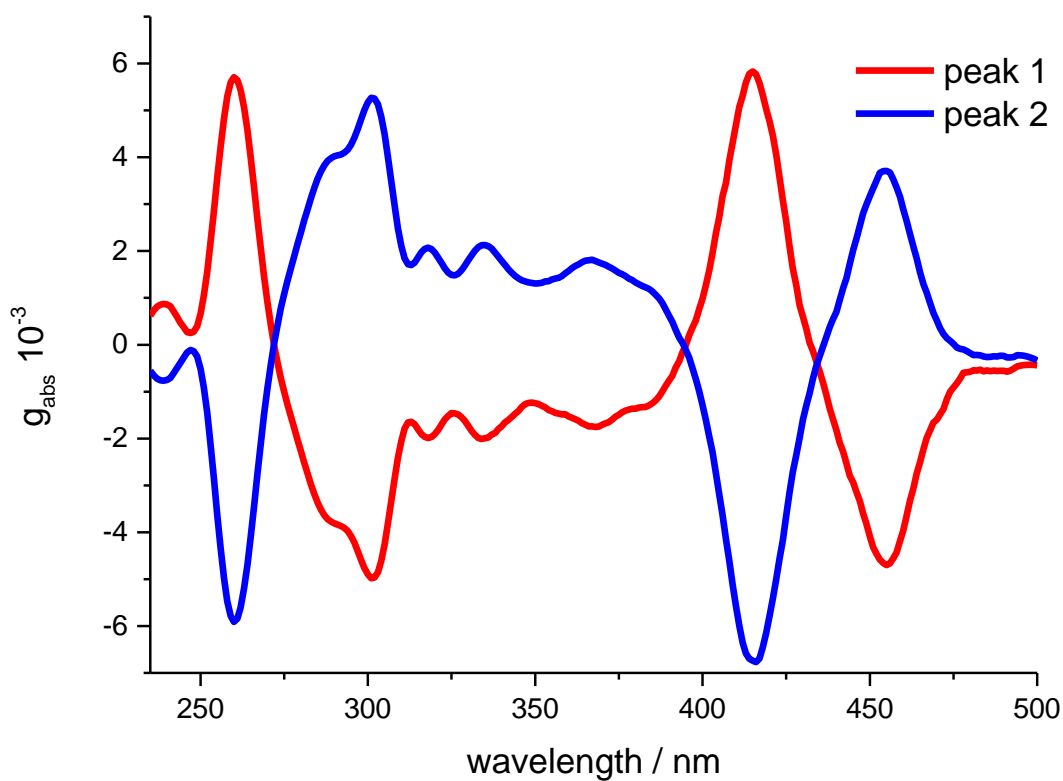

**Figure S67.** Asymmetric factors of the enantiomers of aza[7]helicene **3** in dichloromethane.



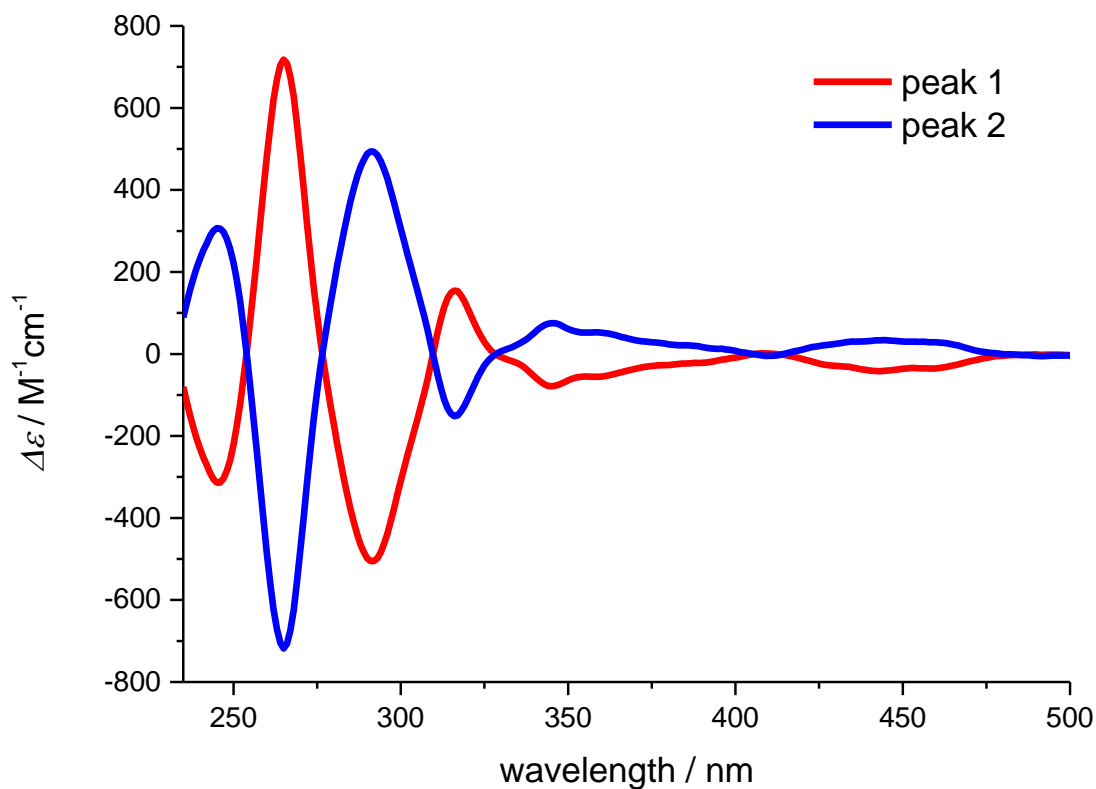

**Figure S68.** CD spectra of the enantiomers of aza[7]helicene **4** in dichloromethane.

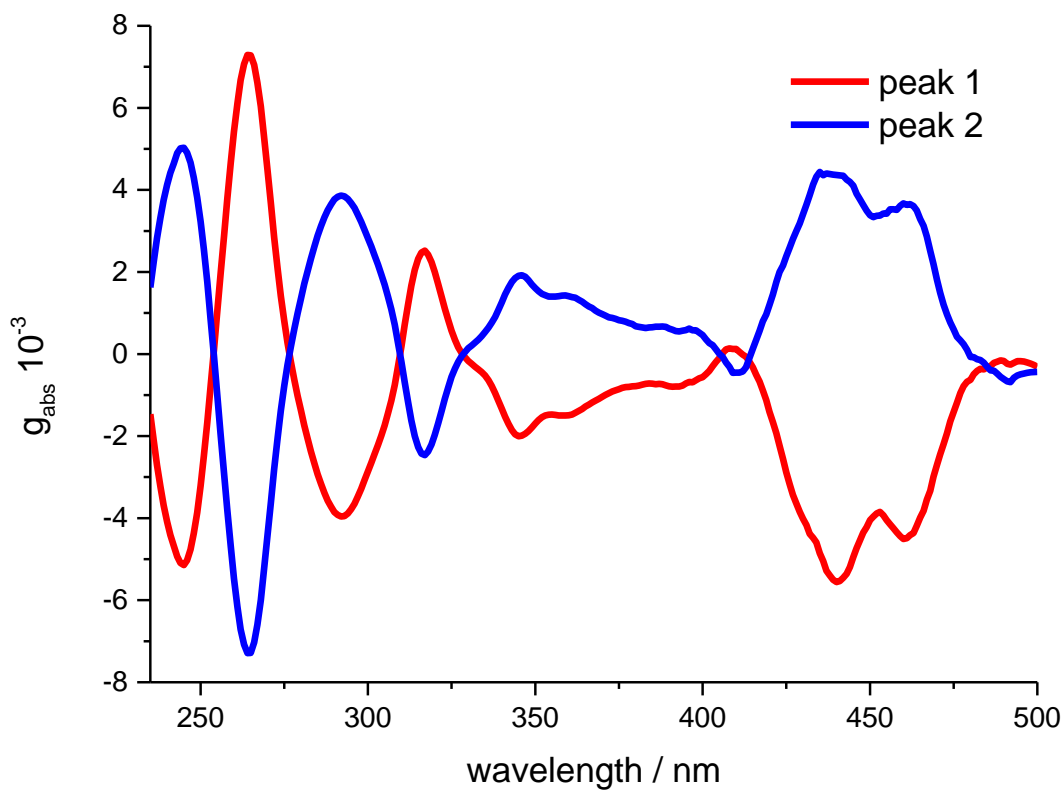

**Figure S69.** Asymmetric factors of the enantiomers of aza[7]helicene **4** in dichloromethane.

## 10. Thermal racemization

The thermal racemizations of *P*-**3** and *P*-**4** were performed in 1,2-dichlorobenzene at 180 °C. The ratio of *P*/*M* isomers were monitored by measuring the optical rotation values. The transformation of *P*-isomer to *M*-isomer follows a reversible first order reaction.<sup>[S3]</sup> The rate constant *k* can be obtained by fitting the experimental data ( $\alpha$ , mole ratio of *P*-**3** or **4** at time *t*) using the following equation:

$$\ln(2\alpha - 1) = -2kt$$

The racemization barriers ( $\Delta G^\ddagger$ ) of **3** and **4** were calculated from the following equation:

$$\Delta G^\ddagger(T) = -RT\ln(kh/k_B T)$$

Here *R* is the gas constant (8.31441 J·K<sup>-1</sup>), *h* is the Planck constant (6.626176 × 10<sup>-34</sup> J·s), *k<sub>B</sub>* is the Boltzmann constant (1.380662 × 10<sup>-23</sup> J·K<sup>-1</sup>) and *T* is temperature (K).

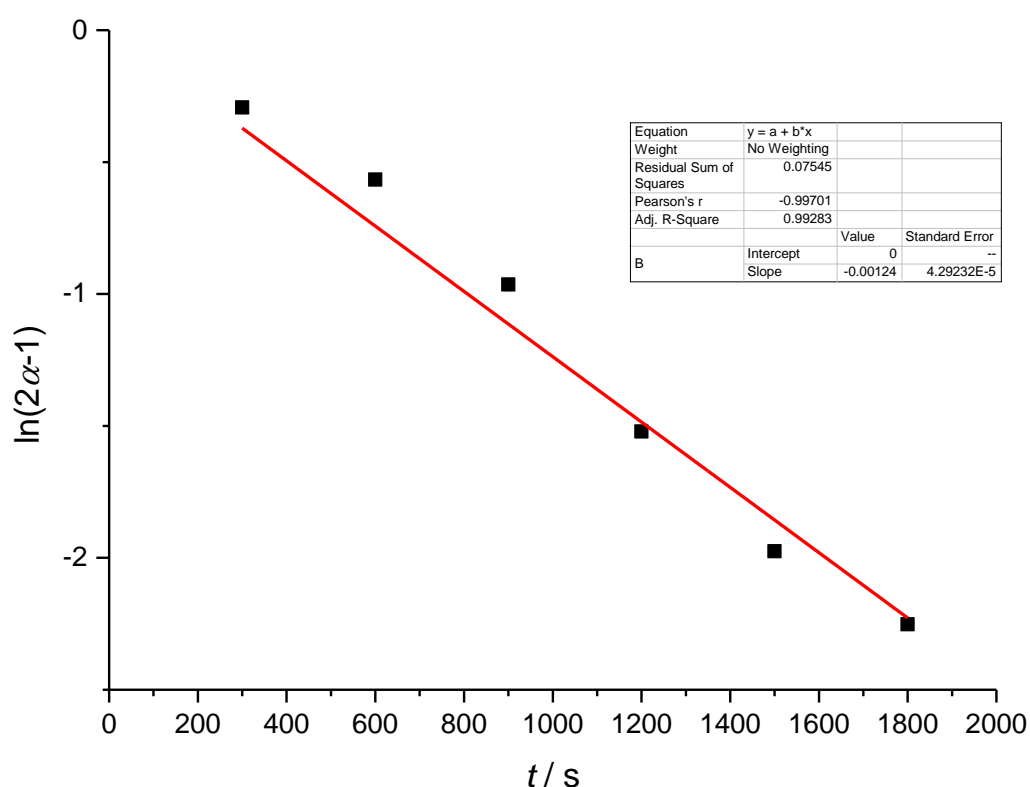

**Figure S70.** Fitting plot of thermal racemization of *P*-**3** in 1,2-dichlorobenzene at 180 °C.

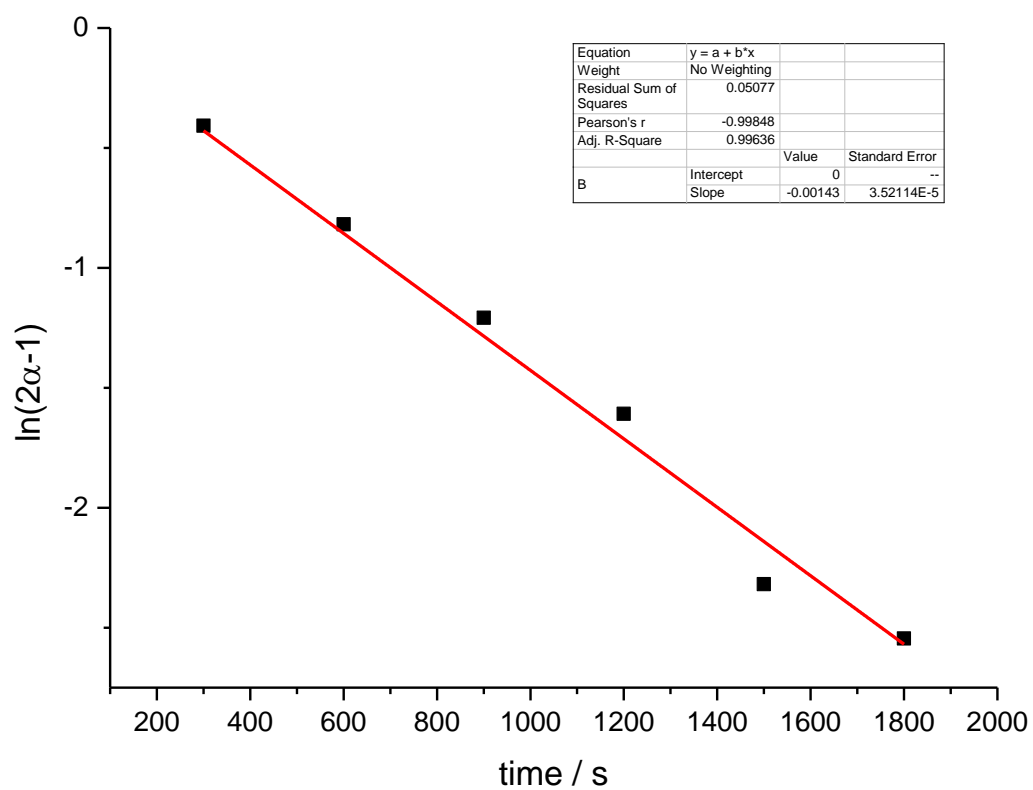

**Figure S71.** Fitting plot of thermal racemization of *P*-4 in 1,2-dichlorobenzene at 180 °C.

## 11. X-ray crystallographic structure determination

**Table S1.** Crystal data and structure refinement for **11**

|                                             |                                                                |
|---------------------------------------------|----------------------------------------------------------------|
| Empirical formula                           | C <sub>46</sub> H <sub>48</sub> N <sub>2</sub> O <sub>2</sub>  |
| Formula weight                              | 660.86                                                         |
| Temperature/K                               | 150.00(10)                                                     |
| Crystal system                              | monoclinic                                                     |
| Space group                                 | C2/c                                                           |
| a/Å                                         | 15.8874(7)                                                     |
| b/Å                                         | 24.6931(11)                                                    |
| c/Å                                         | 40.961(2)                                                      |
| α/°                                         | 90                                                             |
| β/°                                         | 94.789(5)                                                      |
| γ/°                                         | 90                                                             |
| Volume/Å <sup>3</sup>                       | 16013.4(13)                                                    |
| Z                                           | 16                                                             |
| ρ <sub>calc</sub> /cm <sup>3</sup>          | 1.096                                                          |
| μ/mm <sup>-1</sup>                          | 0.512                                                          |
| F(000)                                      | 5664.0                                                         |
| Crystal size/mm <sup>3</sup>                | 0.12 × 0.11 × 0.1                                              |
| Radiation                                   | Cu Kα (λ = 1.54184)                                            |
| 2θ range for data collection/°              | 4.33 to 133.2                                                  |
| Index ranges                                | -18 ≤ h ≤ 17, -29 ≤ k ≤ 28, -48 ≤ l ≤ 40                       |
| Reflections collected                       | 29054                                                          |
| Independent reflections                     | 13990 [R <sub>int</sub> = 0.0426, R <sub>sigma</sub> = 0.0582] |
| Data/restraints/parameters                  | 13990/91/956                                                   |
| Goodness-of-fit on F <sup>2</sup>           | 1.037                                                          |
| Final R indexes [I >= 2σ (I)]               | R <sub>1</sub> = 0.0999, wR <sub>2</sub> = 0.2848              |
| Final R indexes [all data]                  | R <sub>1</sub> = 0.1389, wR <sub>2</sub> = 0.3233              |
| Largest diff. peak/hole / e Å <sup>-3</sup> | 0.59/-0.64                                                     |

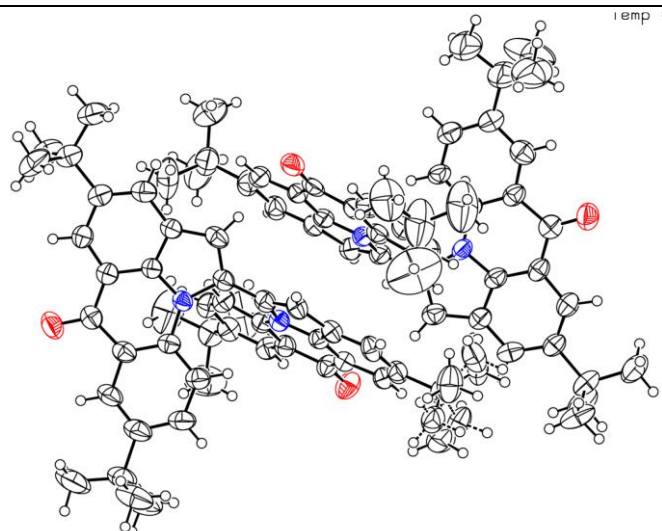

**Figure S72.** Crystal structure of **11** with an ellipsoid contour at the 50% probability level.

**Table S2.** Crystal data and structure refinement for **2**

|                                             |                                                                |
|---------------------------------------------|----------------------------------------------------------------|
| Empirical formula                           | C <sub>52</sub> H <sub>51</sub> N <sub>3</sub> O <sub>2</sub>  |
| Formula weight                              | 749.95                                                         |
| Temperature/K                               | 99.9(4)                                                        |
| Crystal system                              | monoclinic                                                     |
| Space group                                 | P2 <sub>1</sub> /n                                             |
| a/Å                                         | 17.0401(3)                                                     |
| b/Å                                         | 16.9978(3)                                                     |
| c/Å                                         | 33.2623(6)                                                     |
| α/°                                         | 90                                                             |
| β/°                                         | 90.342(2)                                                      |
| γ/°                                         | 90                                                             |
| Volume/Å <sup>3</sup>                       | 9634.1(3)                                                      |
| Z                                           | 8                                                              |
| ρ <sub>calc</sub> /cm <sup>3</sup>          | 1.034                                                          |
| μ/mm <sup>-1</sup>                          | 0.485                                                          |
| F(000)                                      | 3200.0                                                         |
| Crystal size/mm <sup>3</sup>                | 0.13 × 0.12 × 0.11                                             |
| Radiation                                   | Cu Kα (λ = 1.54184)                                            |
| 2θ range for data collection/°              | 5.314 to 147.532                                               |
| Index ranges                                | -21 ≤ h ≤ 20, -20 ≤ k ≤ 17, -41 ≤ l ≤ 40                       |
| Reflections collected                       | 44345                                                          |
| Independent reflections                     | 18865 [R <sub>int</sub> = 0.0369, R <sub>sigma</sub> = 0.0413] |
| Data/restraints/parameters                  | 18865/14/1051                                                  |
| Goodness-of-fit on F <sup>2</sup>           | 1.063                                                          |
| Final R indexes [I ≥ 2σ (I)]                | R <sub>1</sub> = 0.0649, wR <sub>2</sub> = 0.1769              |
| Final R indexes [all data]                  | R <sub>1</sub> = 0.0751, wR <sub>2</sub> = 0.1863              |
| Largest diff. peak/hole / e Å <sup>-3</sup> | 0.55/-0.53                                                     |

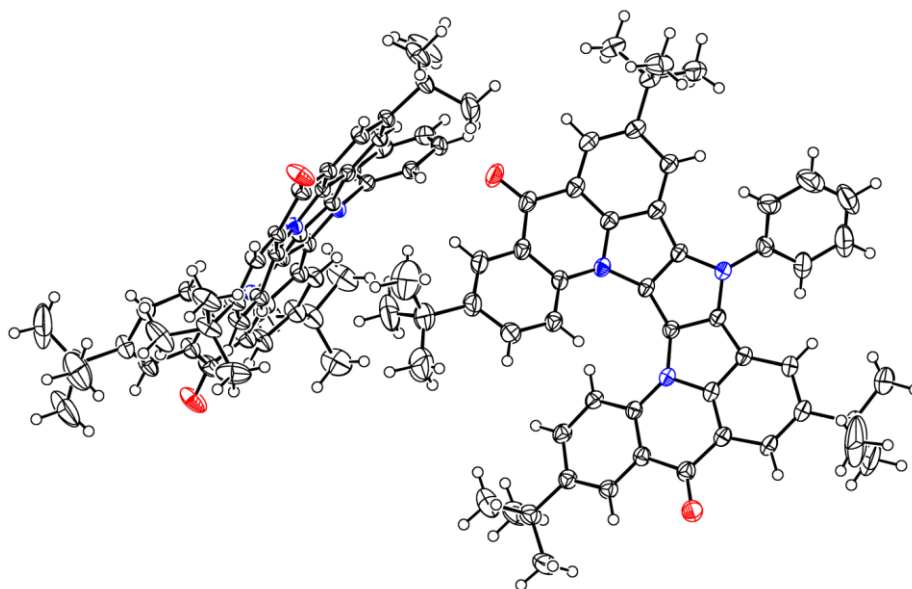**Figure S73.** Crystal structure of **2** with an ellipsoid contour at the 50% probability level.

**Table S3.** Crystal data and structure refinement for **3**

|                                             |                                                               |
|---------------------------------------------|---------------------------------------------------------------|
| Empirical formula                           | C <sub>48</sub> H <sub>48</sub> N <sub>2</sub> O <sub>2</sub> |
| Formula weight                              | 684.88                                                        |
| Temperature/K                               | 150.00(10)                                                    |
| Crystal system                              | triclinic                                                     |
| Space group                                 | P-1                                                           |
| a/Å                                         | 10.9969(6)                                                    |
| b/Å                                         | 11.4966(4)                                                    |
| c/Å                                         | 15.0565(5)                                                    |
| α/°                                         | 92.345(3)                                                     |
| β/°                                         | 97.135(4)                                                     |
| γ/°                                         | 93.016(4)                                                     |
| Volume/Å <sup>3</sup>                       | 1884.03(14)                                                   |
| Z                                           | 2                                                             |
| ρ <sub>calc</sub> /cm <sup>3</sup>          | 1.207                                                         |
| μ/mm <sup>-1</sup>                          | 0.563                                                         |
| F(000)                                      | 732.0                                                         |
| Crystal size/mm <sup>3</sup>                | 0.13 × 0.11 × 0.09                                            |
| Radiation                                   | Cu Kα (λ = 1.54184)                                           |
| 2θ range for data collection/°              | 5.922 to 147.778                                              |
| Index ranges                                | -13 ≤ h ≤ 13, -14 ≤ k ≤ 14, -18 ≤ l ≤ 12                      |
| Reflections collected                       | 12954                                                         |
| Independent reflections                     | 7325 [R <sub>int</sub> = 0.0534, R <sub>sigma</sub> = 0.0673] |
| Data/restraints/parameters                  | 7325/0/512                                                    |
| Goodness-of-fit on F <sup>2</sup>           | 1.144                                                         |
| Final R indexes [I ≥ 2σ (I)]                | R <sub>1</sub> = 0.0762, wR <sub>2</sub> = 0.1882             |
| Final R indexes [all data]                  | R <sub>1</sub> = 0.1105, wR <sub>2</sub> = 0.1972             |
| Largest diff. peak/hole / e Å <sup>-3</sup> | 0.32/-0.32                                                    |

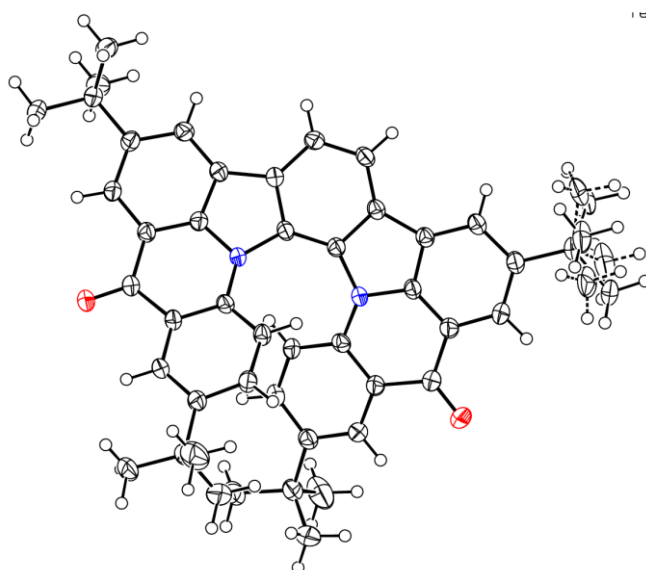**Figure S74.** Crystal structure of **3** with an ellipsoid contour at the 50% probability level.

**Table S4.** Crystal data and structure refinement for **4**

|                                             |                                                               |
|---------------------------------------------|---------------------------------------------------------------|
| Empirical formula                           | C <sub>52</sub> H <sub>50</sub> N <sub>2</sub> O <sub>2</sub> |
| Formula weight                              | 734.94                                                        |
| Temperature/K                               | 100.0(3)                                                      |
| Crystal system                              | monoclinic                                                    |
| Space group                                 | P2 <sub>1</sub> /n                                            |
| a/Å                                         | 15.8931(6)                                                    |
| b/Å                                         | 10.9347(4)                                                    |
| c/Å                                         | 24.8340(8)                                                    |
| α/°                                         | 90                                                            |
| β/°                                         | 92.737(3)                                                     |
| γ/°                                         | 90                                                            |
| Volume/Å <sup>3</sup>                       | 4310.9(3)                                                     |
| Z                                           | 4                                                             |
| ρ <sub>calc</sub> /g/cm <sup>3</sup>        | 1.132                                                         |
| μ/mm <sup>-1</sup>                          | 0.525                                                         |
| F(000)                                      | 1568.0                                                        |
| Crystal size/mm <sup>3</sup>                | 0.14 × 0.1 × 0.08                                             |
| Radiation                                   | Cu Kα (λ = 1.54184)                                           |
| 2θ range for data collection/°              | 6.466 to 147.622                                              |
| Index ranges                                | -18 ≤ h ≤ 19, -13 ≤ k ≤ 7, -30 ≤ l ≤ 30                       |
| Reflections collected                       | 15244                                                         |
| Independent reflections                     | 8393 [R <sub>int</sub> = 0.0621, R <sub>sigma</sub> = 0.0751] |
| Data/restraints/parameters                  | 8393/0/560                                                    |
| Goodness-of-fit on F <sup>2</sup>           | 1.050                                                         |
| Final R indexes [I ≥ 2σ (I)]                | R <sub>1</sub> = 0.0795, wR <sub>2</sub> = 0.2015             |
| Final R indexes [all data]                  | R <sub>1</sub> = 0.1038, wR <sub>2</sub> = 0.2187             |
| Largest diff. peak/hole / e Å <sup>-3</sup> | 0.75/-0.46                                                    |

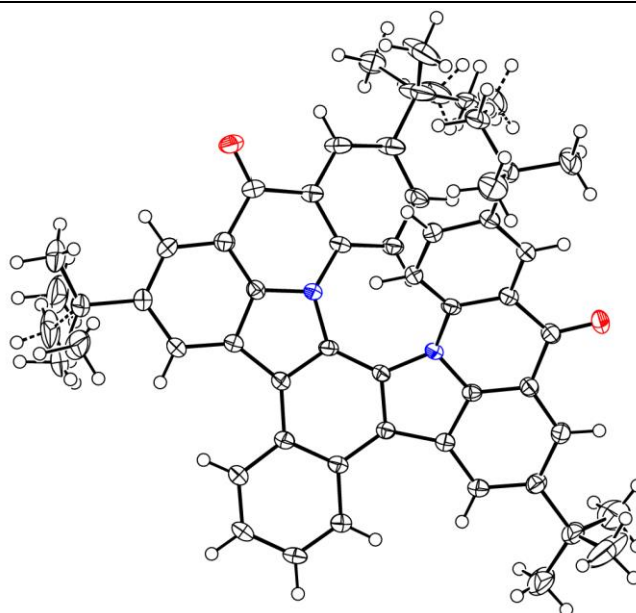**Figure S75.** Crystal structure of **4** with an ellipsoid contour at the 50% probability level.

## 12. Theoretical calculations

All the theoretical calculations were carried out using a *Gaussian 16* software. <sup>[S4]</sup> All the calculations were based on the optimized geometries at B3LYP/6-31G(d,p) level of theory. The frontier molecular orbitals are calculated at the B3LYP/6-311+G(d,p) level of theory. The calculations of excited state properties and ECD spectra were performed using time-dependent DFT methods at B3LYP/6-311G+(d,p) level of theory in the solvent dichloromethane.

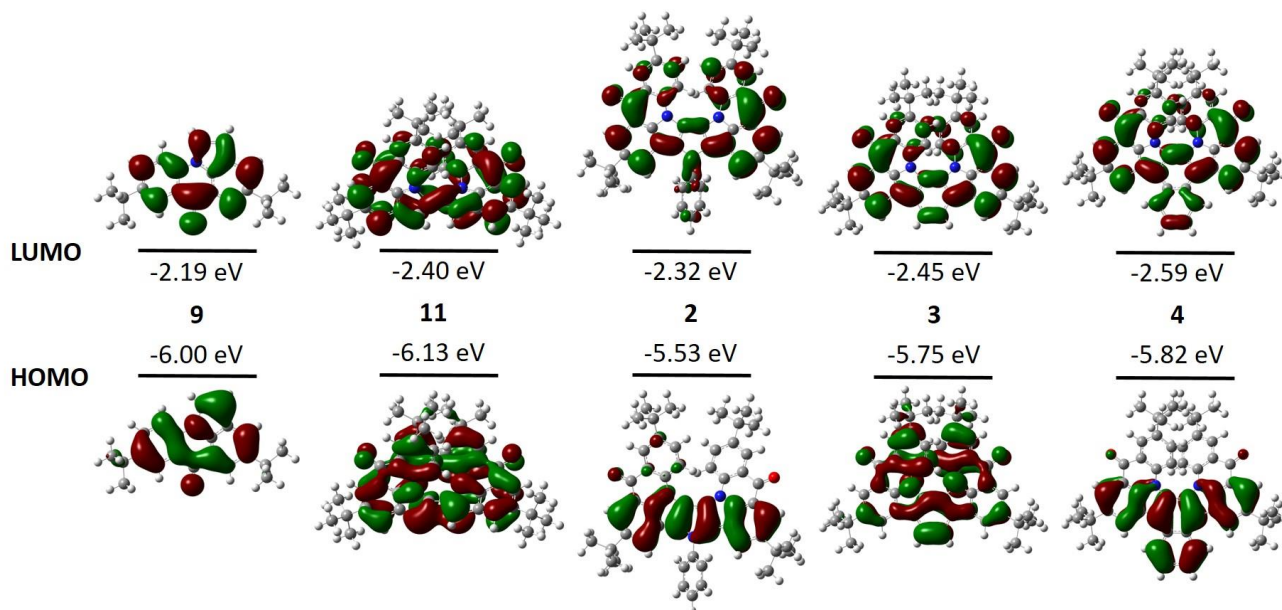

Figure S76. Calculated frontier molecular orbitals and energy levels.

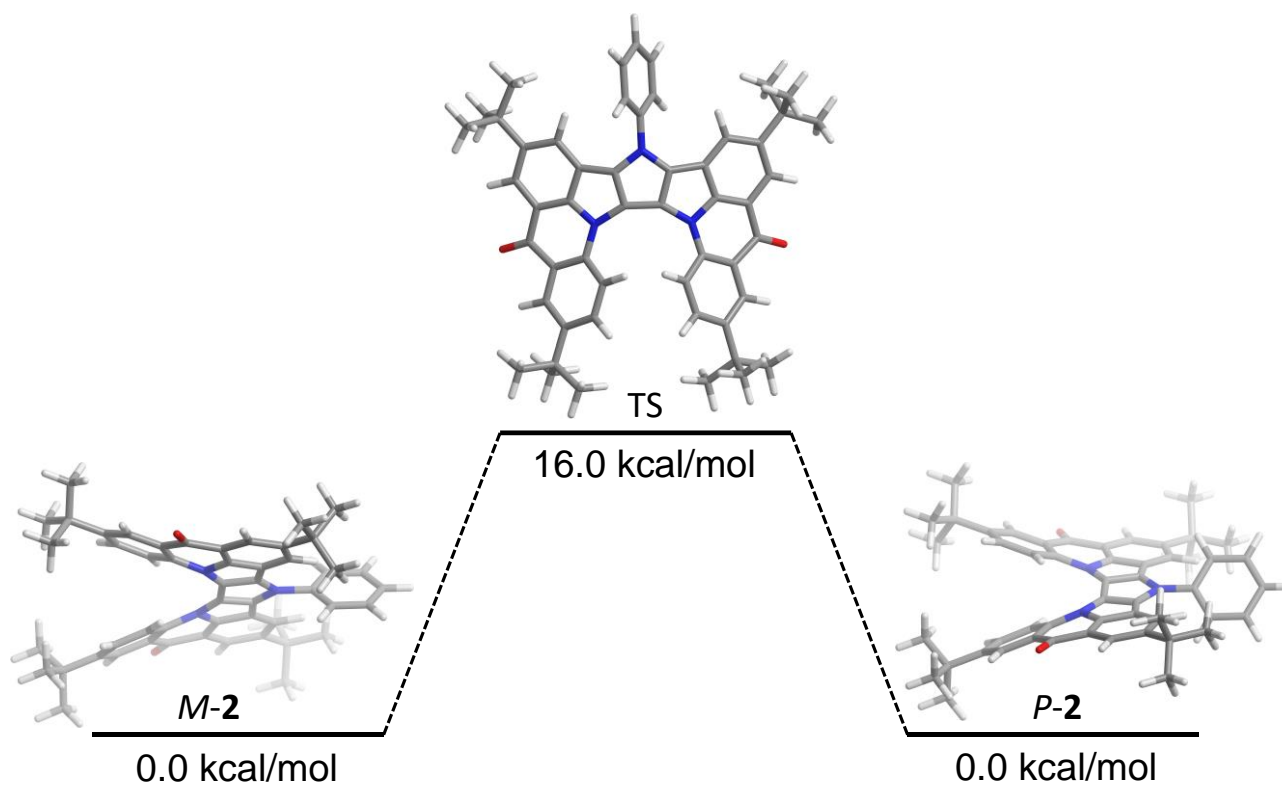

Figure S77. Energy diagram of racemization process of triaza[7]helicene 2.



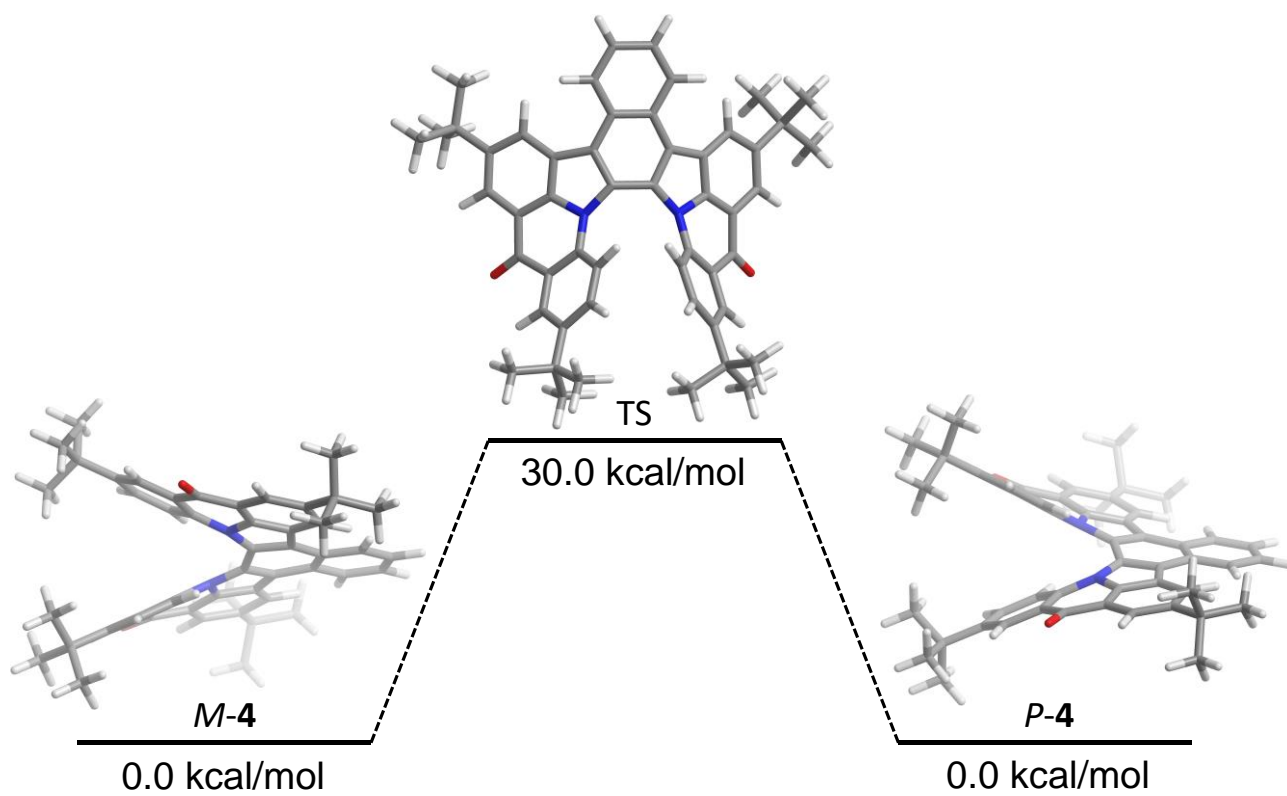

**Figure S78.** Energy diagram of racemization process of triaza[7]helicene 4.

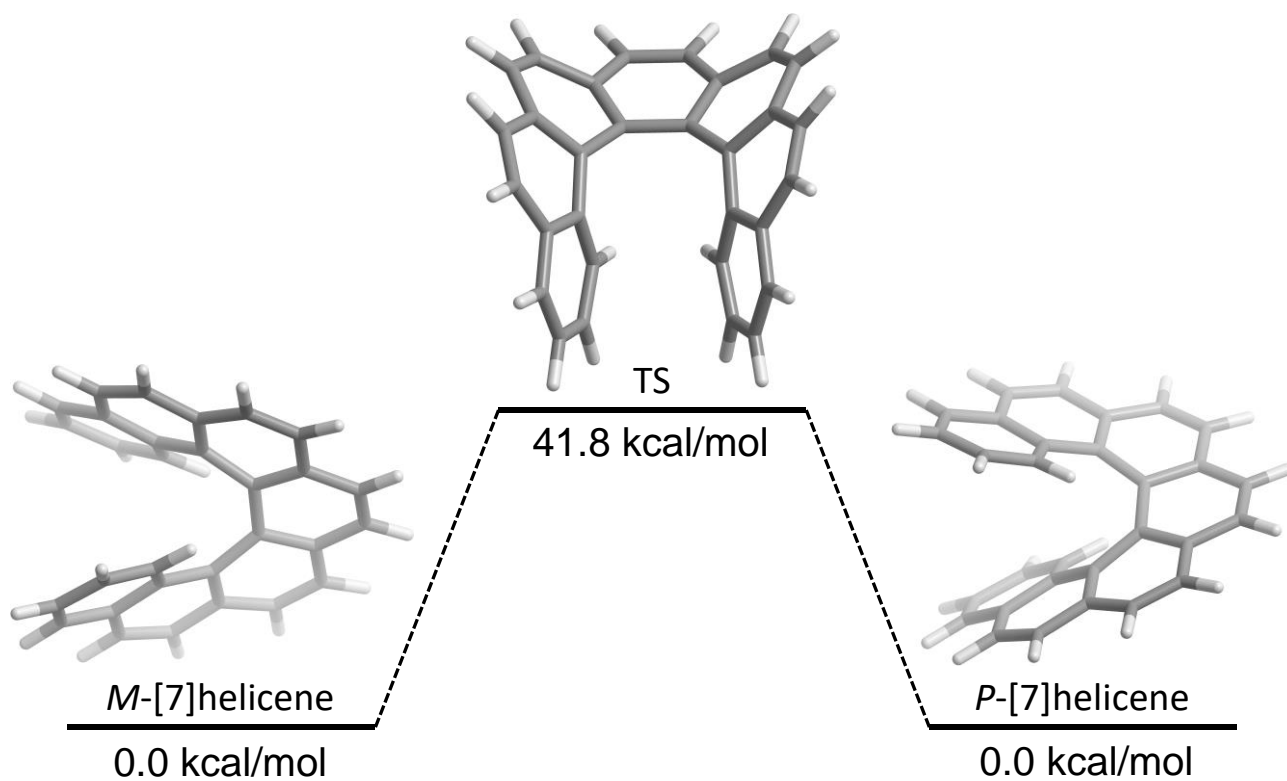

**Figure S79.** Energy diagram of racemization process of carbo[7]helicene.

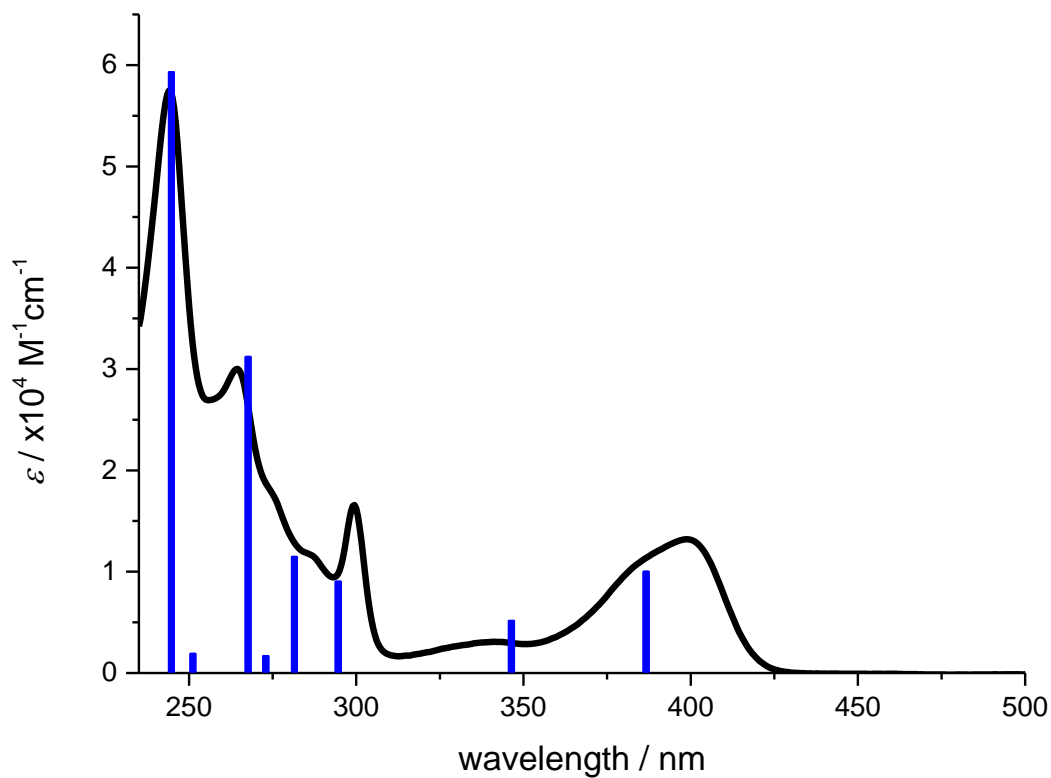

**Figure S80.** UV/Vis absorption spectrum of compound **9** and TD-DFT calculated oscillator strength (blue column) in dichloromethane solvent at B3LYP/6-311G+(d,p) level.

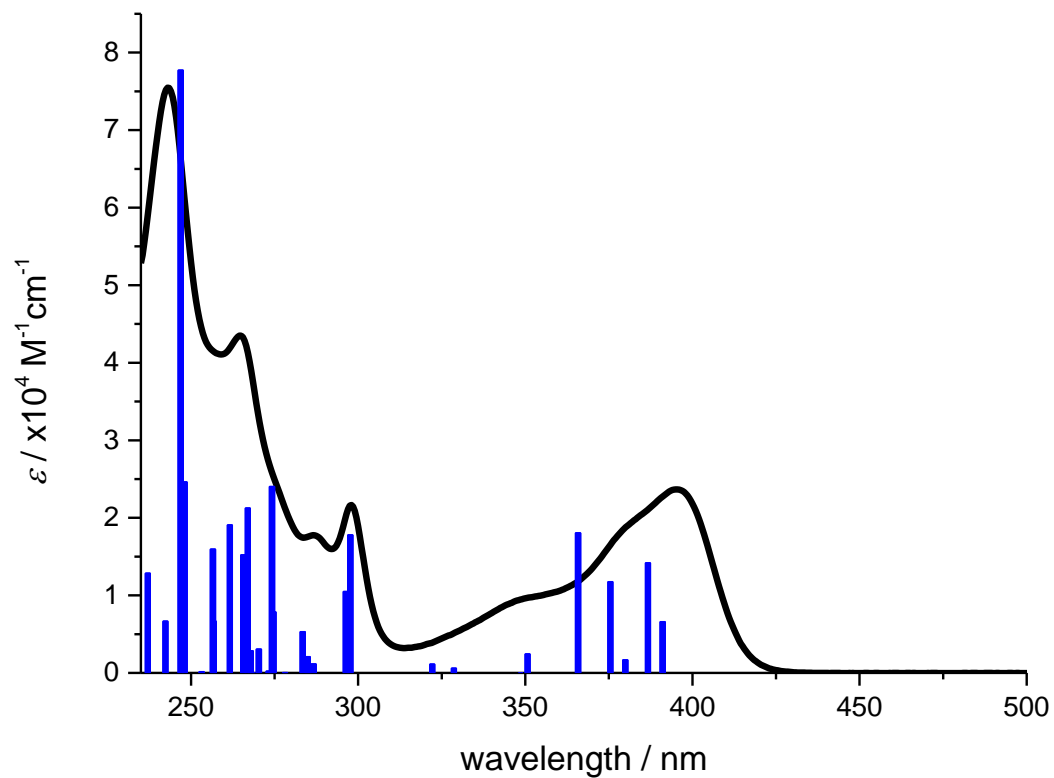

**Figure S81.** UV/Vis absorption spectrum of compound **11** and TD-DFT calculated oscillator strength (blue column) in dichloromethane solvent at B3LYP/6-311G+(d,p) level.

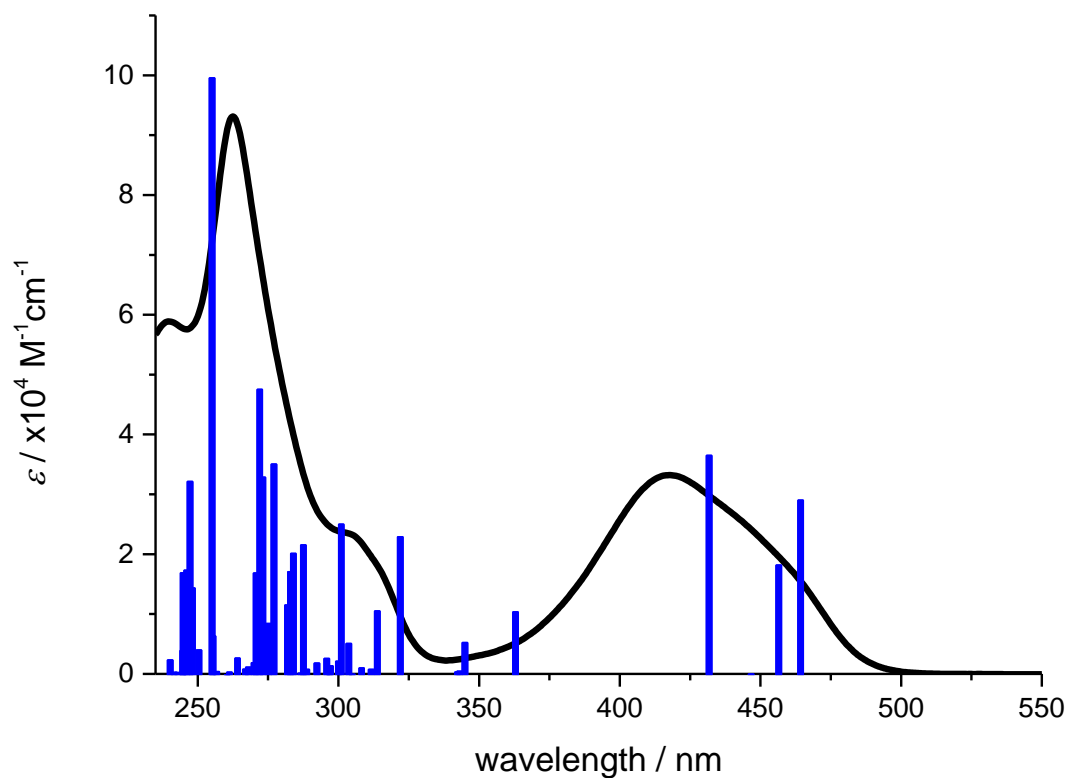

**Figure S82.** UV/Vis absorption spectrum of compound **2** and TD-DFT calculated oscillator strength (blue column) in dichloromethane solvent at B3LYP/6-311G+(d,p) level.

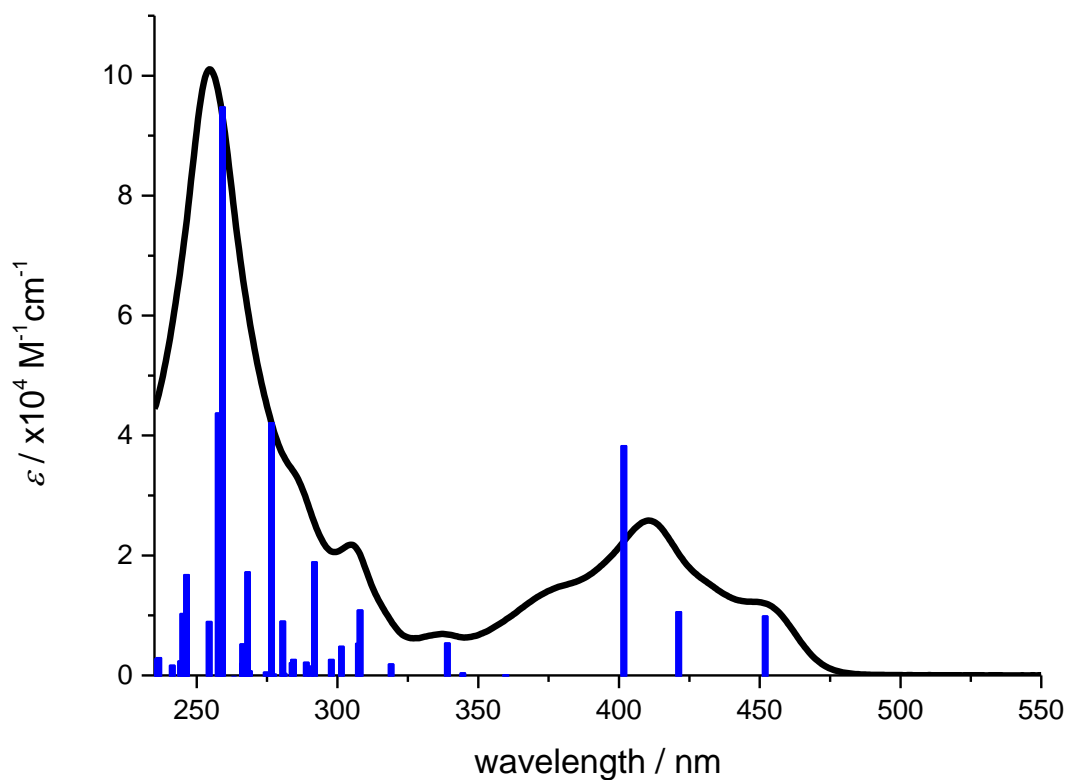

**Figure S83.** UV/Vis absorption spectrum of compound **3** and TD-DFT calculated oscillator strength (blue column) in dichloromethane solvent at B3LYP/6-311G+(d,p) level.

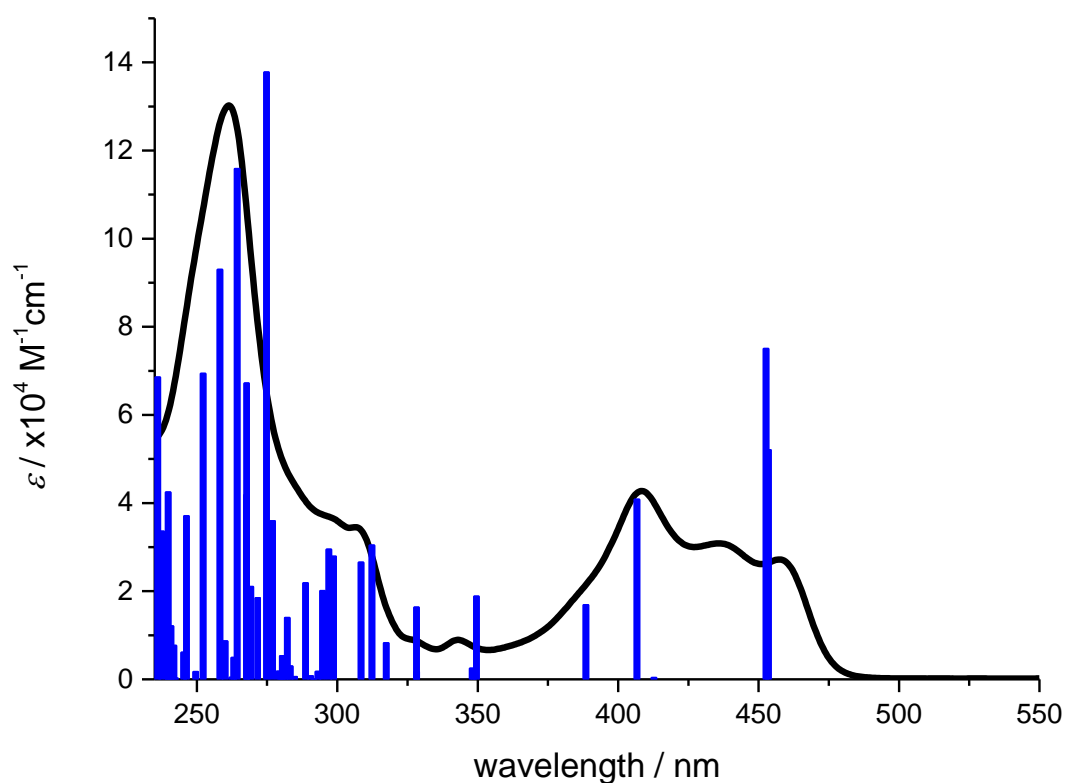

**Figure S84.** UV/Vis absorption spectrum of compound **4** and TD-DFT calculated oscillator strength (blue column) in dichloromethane solvent at B3LYP/6-311G+(d,p) level.

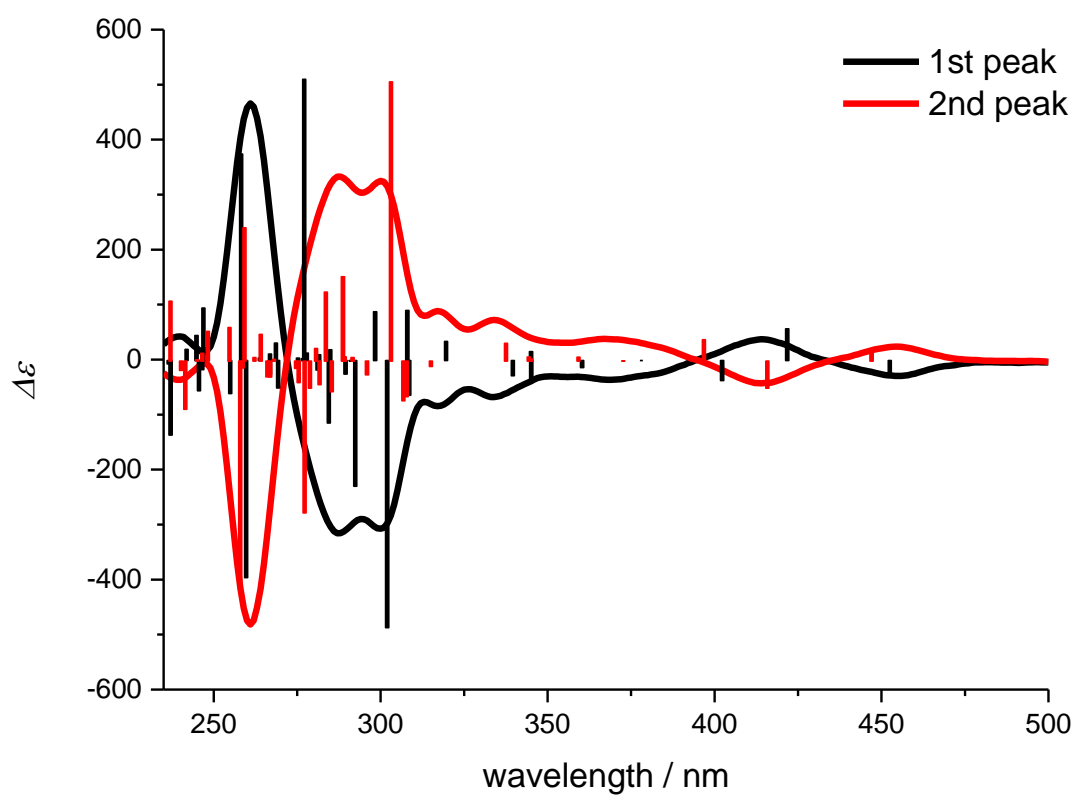

**Figure S85.** CD spectra (solid line) of compound **3** and TD-DFT calculated rotational strength (bar) in dichloromethane solvent at B3LYP/6-311G+(d,p) level.

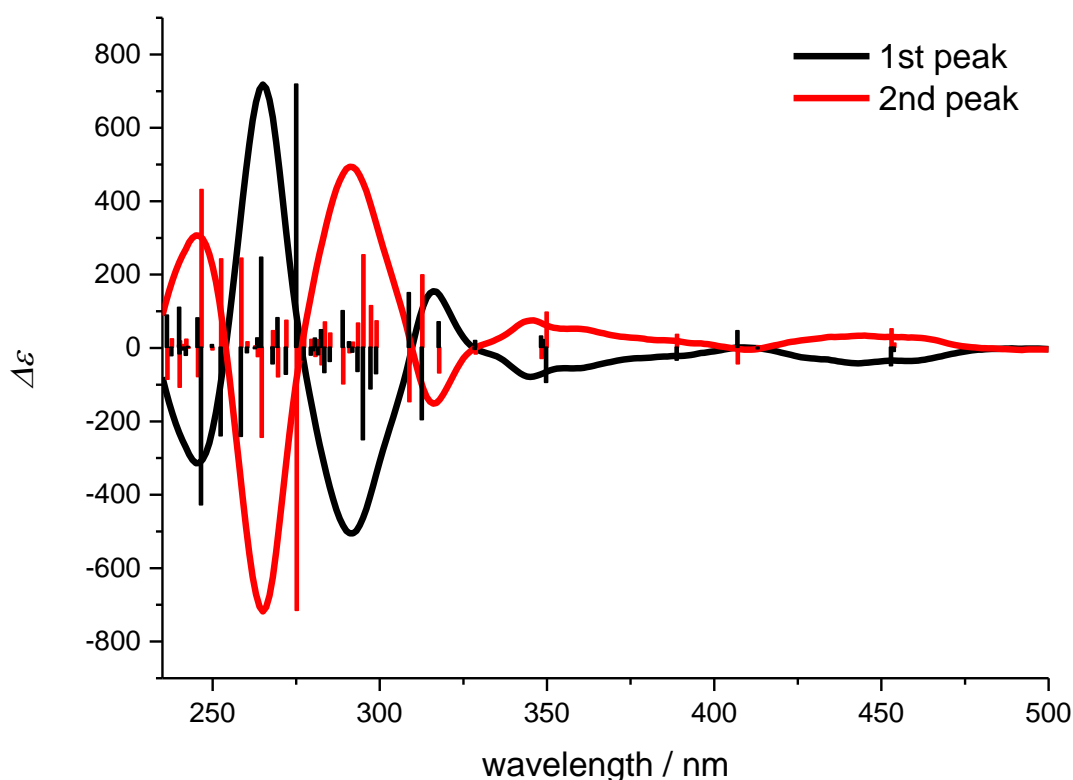

**Figure S86.** CD spectra (solid line) of compound **4** and TD-DFT calculated rotational strength (bar) in dichloromethane solvent at B3LYP/6-311G+(d,p) level.

**Table S5.** TD-DFT calculated first-ten electron transitions of **9** in dichloromethane at B3LYP / 6-311+G(d,p) level

|               |          |           |           |           |          |              |
|---------------|----------|-----------|-----------|-----------|----------|--------------|
| Excited State | 1:       | Singlet-A | 3.2065 eV | 386.67 nm | f=0.1297 | <S**2>=0.000 |
|               | 89 -> 90 | 0.69286   |           |           |          |              |
| Excited State | 2:       | Singlet-A | 3.5791 eV | 346.41 nm | f=0.0665 | <S**2>=0.000 |
|               | 88 -> 90 | 0.69149   |           |           |          |              |
| Excited State | 3:       | Singlet-A | 3.5900 eV | 345.36 nm | f=0.0000 | <S**2>=0.000 |
|               | 86 -> 90 | 0.69815   |           |           |          |              |
| Excited State | 4:       | Singlet-A | 4.2081 eV | 294.63 nm | f=0.1169 | <S**2>=0.000 |
|               | 87 -> 90 | 0.63732   |           |           |          |              |
|               | 88 -> 92 | 0.10543   |           |           |          |              |
|               | 89 -> 91 | 0.23915   |           |           |          |              |
| Excited State | 5:       | Singlet-A | 4.4037 eV | 281.55 nm | f=0.1487 | <S**2>=0.000 |
|               | 85 -> 90 | -0.40393  |           |           |          |              |
|               | 87 -> 90 | -0.20324  |           |           |          |              |
|               | 88 -> 92 | -0.13609  |           |           |          |              |
|               | 89 -> 91 | 0.50107   |           |           |          |              |
| Excited State | 6:       | Singlet-A | 4.5416 eV | 273.00 nm | f=0.0214 | <S**2>=0.000 |
|               | 85 -> 90 | -0.36796  |           |           |          |              |

|               |          |           |           |           |          |              |
|---------------|----------|-----------|-----------|-----------|----------|--------------|
|               | 89 -> 91 | -0.30250  |           |           |          |              |
|               | 89 -> 92 | 0.50632   |           |           |          |              |
| Excited State | 7:       | Singlet-A | 4.6315 eV | 267.70 nm | f=0.4057 | <S**2>=0.000 |
|               | 85 -> 90 | 0.41269   |           |           |          |              |
|               | 87 -> 91 | -0.11998  |           |           |          |              |
|               | 88 -> 91 | 0.12495   |           |           |          |              |
|               | 88 -> 92 | -0.10241  |           |           |          |              |
|               | 89 -> 91 | 0.26303   |           |           |          |              |
|               | 89 -> 92 | 0.44613   |           |           |          |              |
| Excited State | 8:       | Singlet-A | 4.9357 eV | 251.20 nm | f=0.0242 | <S**2>=0.000 |
|               | 88 -> 91 | 0.66934   |           |           |          |              |
|               | 88 -> 92 | 0.16910   |           |           |          |              |
|               | 89 -> 92 | -0.10005  |           |           |          |              |
| Excited State | 9:       | Singlet-A | 5.0653 eV | 244.77 nm | f=0.7713 | <S**2>=0.000 |
|               | 87 -> 90 | -0.16020  |           |           |          |              |
|               | 88 -> 91 | -0.13239  |           |           |          |              |
|               | 88 -> 92 | 0.62404   |           |           |          |              |
|               | 89 -> 91 | 0.12527   |           |           |          |              |
|               | 89 -> 95 | -0.14690  |           |           |          |              |
| Excited State | 10:      | Singlet-A | 5.3611 eV | 231.27 nm | f=0.0549 | <S**2>=0.000 |
|               | 84 -> 90 | 0.66523   |           |           |          |              |

HOMO: 89, LUMO: 90

**Table S6.** TD-DFT calculated first-ten electron transitions of **11** in dichloromethane at B3LYP / 6-311+G(d,p) level

|               |            |           |           |           |          |              |
|---------------|------------|-----------|-----------|-----------|----------|--------------|
| Excited State | 1:         | Singlet-A | 3.1673 eV | 391.45 nm | f=0.0646 | <S**2>=0.000 |
|               | 177 -> 178 | 0.69206   |           |           |          |              |
| Excited State | 2:         | Singlet-A | 3.2034 eV | 387.04 nm | f=0.1393 | <S**2>=0.000 |
|               | 176 -> 178 | 0.65116   |           |           |          |              |
|               | 177 -> 179 | -0.24562  |           |           |          |              |
| Excited State | 3:         | Singlet-A | 3.2605 eV | 380.26 nm | f=0.0164 | <S**2>=0.000 |
|               | 176 -> 178 | 0.25591   |           |           |          |              |
|               | 177 -> 179 | 0.65080   |           |           |          |              |
| Excited State | 4:         | Singlet-A | 3.2991 eV | 375.81 nm | f=0.1153 | <S**2>=0.000 |
|               | 175 -> 178 | 0.19371   |           |           |          |              |
|               | 176 -> 179 | 0.66906   |           |           |          |              |
| Excited State | 5:         | Singlet-A | 3.3862 eV | 366.14 nm | f=0.1773 | <S**2>=0.000 |
|               | 175 -> 178 | 0.66366   |           |           |          |              |
|               | 176 -> 179 | -0.18675  |           |           |          |              |
| Excited State | 6:         | Singlet-A | 3.5317 eV | 351.06 nm | f=0.0239 | <S**2>=0.000 |
|               | 175 -> 179 | 0.68577   |           |           |          |              |
| Excited State | 7:         | Singlet-A | 3.5527 eV | 348.98 nm | f=0.0001 | <S**2>=0.000 |
|               | 170 -> 179 | -0.46129  |           |           |          |              |
|               | 171 -> 178 | 0.50428   |           |           |          |              |

|                   |           |           |           |          |              |  |
|-------------------|-----------|-----------|-----------|----------|--------------|--|
| 172 -> 179        | -0.10580  |           |           |          |              |  |
| Excited State 8:  | Singlet-A | 3.5530 eV | 348.96 nm | f=0.0000 | <S**2>=0.000 |  |
| 170 -> 178        | 0.49504   |           |           |          |              |  |
| 171 -> 179        | -0.46587  |           |           |          |              |  |
| 172 -> 178        | 0.11031   |           |           |          |              |  |
| Excited State 9:  | Singlet-A | 3.7685 eV | 329.00 nm | f=0.0058 | <S**2>=0.000 |  |
| 174 -> 178        | 0.68751   |           |           |          |              |  |
| Excited State 10: | Singlet-A | 3.8442 eV | 322.52 nm | f=0.0111 | <S**2>=0.000 |  |
| 174 -> 179        | 0.68798   |           |           |          |              |  |
| 175 -> 178        | 0.10602   |           |           |          |              |  |

HOMO: 177, LUMO: 178

**Table S7.** TD-DFT calculated first-ten electron transitions of **2** in dichloromethane at B3LYP / 6-311+G(d,p) level

|                  |           |           |           |          |              |  |
|------------------|-----------|-----------|-----------|----------|--------------|--|
| Excited State 1: | Singlet-A | 2.6705 eV | 464.27 nm | f=0.2077 | <S**2>=0.000 |  |
| 199 -> 202       | -0.11701  |           |           |          |              |  |
| 200 -> 201       | 0.69012   |           |           |          |              |  |
| Excited State 2: | Singlet-A | 2.7159 eV | 456.52 nm | f=0.1306 | <S**2>=0.000 |  |
| 199 -> 201       | 0.66478   |           |           |          |              |  |
| 200 -> 202       | -0.22133  |           |           |          |              |  |
| Excited State 3: | Singlet-A | 2.7754 eV | 446.72 nm | f=0.0011 | <S**2>=0.000 |  |
| 199 -> 201       | 0.22046   |           |           |          |              |  |
| 200 -> 202       | 0.66761   |           |           |          |              |  |
| Excited State 4: | Singlet-A | 2.8716 eV | 431.76 nm | f=0.2609 | <S**2>=0.000 |  |
| 199 -> 202       | 0.69039   |           |           |          |              |  |
| 200 -> 201       | 0.11364   |           |           |          |              |  |
| Excited State 5: | Singlet-A | 3.4159 eV | 362.96 nm | f=0.0749 | <S**2>=0.000 |  |
| 198 -> 201       | 0.69616   |           |           |          |              |  |
| Excited State 6: | Singlet-A | 3.5938 eV | 345.00 nm | f=0.0385 | <S**2>=0.000 |  |
| 198 -> 202       | 0.67702   |           |           |          |              |  |
| Excited State 7: | Singlet-A | 3.6140 eV | 343.06 nm | f=0.0044 | <S**2>=0.000 |  |
| 192 -> 201       | -0.15177  |           |           |          |              |  |
| 192 -> 202       | 0.14197   |           |           |          |              |  |
| 193 -> 201       | 0.38125   |           |           |          |              |  |
| 193 -> 202       | -0.29079  |           |           |          |              |  |
| 194 -> 201       | 0.24461   |           |           |          |              |  |
| 194 -> 202       | -0.23798  |           |           |          |              |  |
| 195 -> 201       | 0.19435   |           |           |          |              |  |
| 195 -> 202       | -0.13057  |           |           |          |              |  |
| 198 -> 202       | -0.12745  |           |           |          |              |  |
| Excited State 8: | Singlet-A | 3.6218 eV | 342.33 nm | f=0.0035 | <S**2>=0.000 |  |
| 192 -> 201       | -0.11262  |           |           |          |              |  |
| 192 -> 202       | -0.11593  |           |           |          |              |  |

|                   |           |           |           |          |              |  |
|-------------------|-----------|-----------|-----------|----------|--------------|--|
| 193 -> 201        | -0.20634  |           |           |          |              |  |
| 193 -> 202        | -0.25587  |           |           |          |              |  |
| 194 -> 201        | 0.34116   |           |           |          |              |  |
| 194 -> 202        | 0.35473   |           |           |          |              |  |
| 195 -> 201        | -0.16573  |           |           |          |              |  |
| 195 -> 202        | -0.18697  |           |           |          |              |  |
| 197 -> 201        | -0.11394  |           |           |          |              |  |
| 197 -> 202        | -0.11282  |           |           |          |              |  |
| Excited State 9:  | Singlet-A | 3.8500 eV | 322.04 nm | f=0.1642 | <S**2>=0.000 |  |
| 200 -> 203        | 0.68010   |           |           |          |              |  |
| 200 -> 206        | -0.12217  |           |           |          |              |  |
| Excited State 10: | Singlet-A | 3.9502 eV | 313.87 nm | f=0.0761 | <S**2>=0.000 |  |
| 199 -> 203        | 0.68395   |           |           |          |              |  |

HOMO: 200, LUMO: 201

**Table S8.** TD-DFT calculated first-ten electron transitions of **3** in dichloromethane at B3LYP / 6-311+G(d,p) level

|                  |           |           |           |          |              |  |
|------------------|-----------|-----------|-----------|----------|--------------|--|
| Excited State 1: | Singlet-A | 2.7422 eV | 452.14 nm | f=0.1025 | <S**2>=0.000 |  |
| 183 -> 184       | 0.70127   |           |           |          |              |  |
| Excited State 2: | Singlet-A | 2.9419 eV | 421.44 nm | f=0.1098 | <S**2>=0.000 |  |
| 183 -> 185       | 0.70149   |           |           |          |              |  |
| Excited State 3: | Singlet-A | 3.0845 eV | 401.96 nm | f=0.3910 | <S**2>=0.000 |  |
| 182 -> 184       | 0.69449   |           |           |          |              |  |
| Excited State 4: | Singlet-A | 3.2820 eV | 377.77 nm | f=0.0000 | <S**2>=0.000 |  |
| 182 -> 185       | 0.70068   |           |           |          |              |  |
| Excited State 5: | Singlet-A | 3.4439 eV | 360.01 nm | f=0.0027 | <S**2>=0.000 |  |
| 181 -> 184       | 0.69369   |           |           |          |              |  |
| Excited State 6: | Singlet-A | 3.5960 eV | 344.78 nm | f=0.0061 | <S**2>=0.000 |  |
| 175 -> 184       | 0.11834   |           |           |          |              |  |
| 176 -> 185       | 0.39672   |           |           |          |              |  |
| 177 -> 184       | 0.44297   |           |           |          |              |  |
| 178 -> 184       | -0.21680  |           |           |          |              |  |
| 179 -> 185       | 0.22605   |           |           |          |              |  |
| 181 -> 185       | 0.10318   |           |           |          |              |  |
| Excited State 7: | Singlet-A | 3.5966 eV | 344.73 nm | f=0.0010 | <S**2>=0.000 |  |
| 175 -> 185       | 0.10787   |           |           |          |              |  |
| 176 -> 184       | 0.43630   |           |           |          |              |  |
| 177 -> 185       | 0.40512   |           |           |          |              |  |
| 178 -> 185       | -0.18630  |           |           |          |              |  |
| 179 -> 184       | 0.27195   |           |           |          |              |  |
| Excited State 8: | Singlet-A | 3.6543 eV | 339.28 nm | f=0.0567 | <S**2>=0.000 |  |
| 181 -> 185       | 0.68810   |           |           |          |              |  |
| Excited State 9: | Singlet-A | 3.8830 eV | 319.30 nm | f=0.0210 | <S**2>=0.000 |  |
| 178 -> 184       | 0.12019   |           |           |          |              |  |



|                   |            |           |           |          |              |  |
|-------------------|------------|-----------|-----------|----------|--------------|--|
|                   | 182 -> 187 | -0.14535  |           |          |              |  |
|                   | 183 -> 186 | 0.66129   |           |          |              |  |
| Excited State 10: | Singlet-A  | 4.0219 eV | 308.27 nm | f=0.1125 | <S**2>=0.000 |  |
|                   | 179 -> 184 | -0.13905  |           |          |              |  |
|                   | 182 -> 186 | 0.12322   |           |          |              |  |
|                   | 183 -> 187 | 0.66106   |           |          |              |  |

HOMO: 183, LUMO: 184

**Table S9.** TD-DFT calculated first-ten electron transitions of **4** in dichloromethane at B3LYP / 6-311+G(d,p) level

|                  |            |           |           |          |              |
|------------------|------------|-----------|-----------|----------|--------------|
| Excited State 1: | Singlet-A  | 2.7326 eV | 453.72 nm | f=0.2013 | <S**2>=0.000 |
|                  | 195 -> 197 | 0.69942   |           |          |              |
| Excited State 2: | Singlet-A  | 2.7379 eV | 452.85 nm | f=0.2902 | <S**2>=0.000 |
|                  | 196 -> 197 | 0.69878   |           |          |              |
| Excited State 3: | Singlet-A  | 3.0023 eV | 412.97 nm | f=0.0014 | <S**2>=0.000 |
|                  | 196 -> 198 | 0.70294   |           |          |              |
| Excited State 4: | Singlet-A  | 3.0467 eV | 406.94 nm | f=0.1578 | <S**2>=0.000 |
|                  | 194 -> 197 | 0.13955   |           |          |              |
|                  | 195 -> 198 | 0.68673   |           |          |              |
| Excited State 5: | Singlet-A  | 3.1892 eV | 388.77 nm | f=0.0654 | <S**2>=0.000 |
|                  | 194 -> 197 | 0.68590   |           |          |              |
|                  | 195 -> 198 | -0.14366  |           |          |              |
| Excited State 6: | Singlet-A  | 3.5449 eV | 349.76 nm | f=0.0728 | <S**2>=0.000 |
|                  | 189 -> 198 | 0.18834   |           |          |              |
|                  | 190 -> 197 | -0.21555  |           |          |              |
|                  | 191 -> 197 | 0.11264   |           |          |              |
|                  | 194 -> 198 | 0.61229   |           |          |              |
| Excited State 7: | Singlet-A  | 3.5548 eV | 348.78 nm | f=0.0017 | <S**2>=0.000 |
|                  | 187 -> 198 | -0.10826  |           |          |              |
|                  | 189 -> 197 | 0.46342   |           |          |              |
|                  | 189 -> 199 | -0.12152  |           |          |              |
|                  | 190 -> 198 | -0.38906  |           |          |              |
|                  | 191 -> 198 | 0.14153   |           |          |              |
|                  | 192 -> 197 | 0.25079   |           |          |              |
| Excited State 8: | Singlet-A  | 3.5602 eV | 348.25 nm | f=0.0096 | <S**2>=0.000 |
|                  | 187 -> 197 | 0.11323   |           |          |              |
|                  | 189 -> 198 | -0.34132  |           |          |              |
|                  | 190 -> 197 | 0.42363   |           |          |              |
|                  | 190 -> 199 | -0.11221  |           |          |              |
|                  | 191 -> 197 | -0.14270  |           |          |              |
|                  | 192 -> 198 | -0.16401  |           |          |              |
|                  | 194 -> 198 | 0.33258   |           |          |              |
| Excited State 9: | Singlet-A  | 3.7739 eV | 328.53 nm | f=0.0067 | <S**2>=0.000 |
|                  | 191 -> 197 | -0.13644  |           |          |              |

|                   |           |           |           |          |              |
|-------------------|-----------|-----------|-----------|----------|--------------|
| 195 -> 199        | 0.62237   |           |           |          |              |
| 196 -> 200        | 0.26180   |           |           |          |              |
| Excited State 10: | Singlet-A | 3.7751 eV | 328.43 nm | f=0.0632 | <S**2>=0.000 |
| 195 -> 200        | -0.10627  |           |           |          |              |
| 196 -> 199        | 0.68237   |           |           |          |              |

HOMO: 196, LUMO: 197

### Cartesian coordinates for theoretically optimized structures

9 opt B3LYP/6-31G(d,p) Imaginary Frequency 0 HF = -1021.5626969 hartree

|   |             |             |             |
|---|-------------|-------------|-------------|
| C | 0.43549000  | 3.12887700  | -0.00002600 |
| C | 1.80248300  | 3.18551000  | 0.00001400  |
| C | 2.29561000  | 1.82617900  | 0.00001500  |
| C | 1.15062200  | 1.00961600  | -0.00001000 |
| N | 0.02216200  | 1.79133900  | -0.00003300 |
| C | -1.24343000 | 1.19538400  | -0.00003600 |
| C | -2.42514800 | 1.94865600  | -0.00002500 |
| C | -1.32014600 | -0.21794600 | -0.00004700 |
| C | -3.65449900 | 1.30675300  | -0.00002000 |
| H | -2.38370600 | 3.03254400  | -0.00001500 |
| C | -2.58466500 | -0.82805800 | -0.00004100 |
| C | -3.77109000 | -0.09916500 | -0.00002300 |
| H | -4.54971700 | 1.92123800  | -0.00001400 |
| H | -2.58062400 | -1.91125800 | -0.00006000 |
| C | -0.10863700 | -1.10005400 | -0.00005700 |
| O | -0.19594800 | -2.32675700 | -0.00007900 |
| C | 3.54485400  | 1.19109600  | 0.00001000  |
| H | 4.44575900  | 1.79329900  | 0.00002400  |
| C | 3.63200500  | -0.21372200 | -0.00001900 |
| C | 2.44476100  | -0.97785000 | -0.00003200 |
| H | 2.48107700  | -2.06195700 | -0.00004100 |
| C | 1.18083300  | -0.38225900 | -0.00002800 |
| C | -5.16259300 | -0.75561300 | 0.00002500  |
| C | -5.94044000 | -0.31346300 | 1.26230500  |
| H | -6.93714600 | -0.76832400 | 1.27388300  |
| H | -5.41629100 | -0.62096100 | 2.17289400  |
| H | -6.07185000 | 0.77220900  | 1.30273400  |
| C | -5.07667000 | -2.29312900 | -0.00019300 |
| H | -6.08555300 | -2.71792000 | -0.00015700 |
| H | -4.55800900 | -2.67209700 | -0.88642900 |
| H | -4.55785700 | -2.67237600 | 0.88583300  |
| C | -5.94075600 | -0.31316500 | -1.26194500 |
| H | -6.07213200 | 0.77252000  | -1.30215000 |

---

|   |             |             |             |
|---|-------------|-------------|-------------|
| H | -5.41688000 | -0.62051900 | -2.17274100 |
| H | -6.93748900 | -0.76797000 | -1.27333500 |
| C | 4.98861800  | -0.94888400 | 0.00002100  |
| C | 5.09254800  | -1.83736000 | 1.26242700  |
| H | 5.03110800  | -1.23235400 | 2.17296700  |
| H | 4.29350900  | -2.58293800 | 1.30302900  |
| H | 6.04863100  | -2.37270900 | 1.27388500  |
| C | 5.09240500  | -1.83786500 | -1.26203300 |
| H | 5.03093400  | -1.23322100 | -2.17281300 |
| H | 6.04845800  | -2.37327100 | -1.27335400 |
| H | 4.29333500  | -2.58342800 | -1.30230400 |
| C | 6.18472100  | 0.02181000  | -0.00026900 |
| H | 6.19106400  | 0.66301500  | -0.88795000 |
| H | 6.19137200  | 0.66321800  | 0.88726200  |
| H | 7.11938800  | -0.54784200 | -0.00035100 |
| H | -0.28593200 | 3.93098100  | -0.00003400 |
| H | 2.38975400  | 4.09271500  | 0.00001900  |

---

**11** opt B3LYP/6-31G(d,p) Imaginary Frequency 0 HF = -2041.9245919 hartree

---

|   |             |             |             |
|---|-------------|-------------|-------------|
| C | -0.73044000 | -1.77475200 | -0.05492500 |
| C | -1.48434700 | -2.68060200 | -0.76244900 |
| C | -2.87171700 | -2.33876900 | -0.60513900 |
| C | -2.88758200 | -1.20530900 | 0.22690000  |
| N | -1.60485200 | -0.85373700 | 0.58107000  |
| C | -1.40581200 | 0.22212000  | 1.46988000  |
| C | -0.14166600 | 0.59249200  | 1.95159000  |
| C | -2.54081900 | 0.95298800  | 1.90383800  |
| C | -0.01317800 | 1.66836100  | 2.81820400  |
| H | 0.73970000  | 0.03746300  | 1.66468800  |
| C | -2.36539700 | 2.03658100  | 2.77940200  |
| C | -1.11718400 | 2.42738600  | 3.25385500  |
| H | 0.98468900  | 1.91906200  | 3.16504900  |
| H | -3.27320400 | 2.55178600  | 3.06865100  |
| C | -3.93944800 | 0.61955600  | 1.49358500  |
| O | -4.90901600 | 1.27480400  | 1.87181800  |
| C | -4.09738400 | -2.84013600 | -1.06664300 |
| H | -4.10290200 | -3.71351200 | -1.70806200 |
| C | -5.30345900 | -2.21839300 | -0.70242100 |
| C | -5.25992700 | -1.08333000 | 0.13634200  |
| H | -6.17152600 | -0.57804400 | 0.43701800  |
| C | -4.05866300 | -0.55806200 | 0.61644100  |
| C | -0.91147300 | 3.61476000  | 4.20943800  |
| C | -0.25697600 | 3.11465600  | 5.51915200  |
| H | -0.09868300 | 3.95146500  | 6.20839800  |

---

---

|   |             |             |             |
|---|-------------|-------------|-------------|
| H | -0.89459800 | 2.37869900  | 6.01951500  |
| H | 0.71551900  | 2.64681700  | 5.33815200  |
| C | -2.24012500 | 4.30641400  | 4.56640200  |
| H | -2.04809000 | 5.14434600  | 5.24405600  |
| H | -2.74232500 | 4.70614700  | 3.67976600  |
| H | -2.93193600 | 3.62458400  | 5.07104600  |
| C | 0.01489500  | 4.65736900  | 3.53959100  |
| H | 0.99456600  | 4.23634200  | 3.29405800  |
| H | -0.42773400 | 5.03632500  | 2.61280800  |
| H | 0.17801000  | 5.50779200  | 4.21084800  |
| C | -6.67310700 | -2.73467700 | -1.18831800 |
| C | -7.54103700 | -3.11837100 | 0.03369100  |
| H | -7.06446800 | -3.91153100 | 0.61902100  |
| H | -7.70772600 | -2.26669700 | 0.69923000  |
| H | -8.52140400 | -3.48092700 | -0.29496800 |
| C | -7.38557700 | -1.62225700 | -1.99380500 |
| H | -6.79723600 | -1.33640500 | -2.87190900 |
| H | -8.36486700 | -1.97109600 | -2.34004400 |
| H | -7.54675700 | -0.72293000 | -1.39269800 |
| C | -6.54620500 | -3.97446100 | -2.09349600 |
| H | -5.96591800 | -3.76314700 | -2.99781900 |
| H | -6.07674000 | -4.81531500 | -1.57221500 |
| H | -7.54159000 | -4.30023100 | -2.41126000 |
| H | -1.06734500 | -3.48386300 | -1.35296400 |
| C | 0.73044200  | -1.77475100 | 0.05494400  |
| C | 1.48435000  | -2.68059400 | 0.76247500  |
| N | 1.60485300  | -0.85374000 | -0.58105900 |
| C | 2.87172000  | -2.33876200 | 0.60516000  |
| H | 1.06735000  | -3.48385200 | 1.35299600  |
| C | 2.88758300  | -1.20530700 | -0.22688600 |
| C | 1.40581200  | 0.22210900  | -1.46987800 |
| C | 4.09738700  | -2.84012500 | 1.06666700  |
| C | 4.05866300  | -0.55806300 | -0.61643400 |
| C | 0.14166500  | 0.59247400  | -1.95159200 |
| C | 2.54081700  | 0.95297400  | -1.90384300 |
| H | 4.10290800  | -3.71349600 | 1.70809300  |
| C | 5.30346300  | -2.21838400 | 0.70243800  |
| C | 3.93944700  | 0.61954800  | -1.49358700 |
| C | 5.25992900  | -1.08332600 | -0.13633300 |
| C | 0.01317500  | 1.66833500  | -2.81821600 |
| H | -0.73970000 | 0.03744700  | -1.66468500 |
| C | 2.36539400  | 2.03655800  | -2.77941800 |
| C | 6.67311100  | -2.73466300 | 1.18833700  |
| O | 4.90901400  | 1.27478800  | -1.87183300 |

---

---

|   |             |             |             |
|---|-------------|-------------|-------------|
| H | 6.17152600  | -0.57804300 | -0.43701400 |
| C | 1.11718000  | 2.42735700  | -3.25387500 |
| H | -0.98469200 | 1.91903100  | -3.16506500 |
| H | 3.27320000  | 2.55176200  | -3.06867200 |
| C | 7.54103800  | -3.11837300 | -0.03366900 |
| C | 7.38558500  | -1.62223400 | 1.99380900  |
| C | 6.54621100  | -3.97443600 | 2.09353100  |
| C | 0.91146800  | 3.61472200  | -4.20946900 |
| H | 7.06446500  | -3.91153900 | -0.61898900 |
| H | 7.70772600  | -2.26670700 | -0.69921800 |
| H | 8.52140500  | -3.48092800 | 0.29499100  |
| H | 6.79724600  | -1.33637200 | 2.87191200  |
| H | 8.36487600  | -1.97106900 | 2.34004900  |
| H | 7.54676300  | -0.72291400 | 1.39269100  |
| H | 5.96592900  | -3.76311000 | 2.99785500  |
| H | 6.07674000  | -4.81529500 | 1.57226300  |
| H | 7.54159600  | -4.30020600 | 2.41129300  |
| C | 0.25697200  | 3.11460400  | -5.51917900 |
| C | 2.24011900  | 4.30637400  | -4.56644000 |
| C | -0.01490100 | 4.65733600  | -3.53963300 |
| H | 0.09867800  | 3.95140600  | -6.20843300 |
| H | 0.89459500  | 2.37864300  | -6.01953500 |
| H | -0.71552300 | 2.64676500  | -5.33817400 |
| H | 2.04808300  | 5.14430000  | -5.24410200 |
| H | 2.74231900  | 4.70611600  | -3.67980800 |
| H | 2.93193100  | 3.62454000  | -5.07107800 |
| H | -0.99457200 | 4.23631000  | -3.29409600 |
| H | 0.42772700  | 5.03630200  | -2.61285300 |
| H | -0.17801700 | 5.50775200  | -4.21089800 |

---

**2 opt B3LYP/6-31G(d,p) Imaginary Frequency 0 HF = -2327.108323 hartree**

---

|   |             |             |             |
|---|-------------|-------------|-------------|
| C | -1.56488600 | -1.55445500 | -0.08582600 |
| C | -0.83604600 | -0.35530600 | -0.00429200 |
| C | 0.53564800  | -0.71989600 | 0.01100800  |
| C | 0.57313900  | -2.12333500 | 0.09488200  |
| N | -0.70920900 | -2.64059400 | 0.00523700  |
| C | 1.93270600  | -2.55822500 | 0.26653800  |
| C | 2.67663900  | -1.35348500 | 0.22874900  |
| C | -2.96123200 | -1.25766700 | -0.26010500 |
| C | -3.00908600 | 0.16051500  | -0.22617500 |
| N | -1.75166300 | 0.71950800  | -0.03607300 |
| N | 1.86390500  | -0.24284600 | 0.03996600  |
| C | 2.45750100  | 0.94449100  | -0.41615300 |

---

---

|   |             |             |             |
|---|-------------|-------------|-------------|
| C | 1.73019300  | 1.95848300  | -1.04548600 |
| C | 3.86224800  | 1.09202800  | -0.27908900 |
| C | 2.36431900  | 3.12784200  | -1.45346200 |
| H | 0.67149400  | 1.83213800  | -1.23176500 |
| C | 4.46161800  | 2.28787800  | -0.69183500 |
| C | 3.74216400  | 3.33652200  | -1.26846000 |
| H | 1.75728900  | 3.88558600  | -1.93474000 |
| H | 5.53691300  | 2.34576600  | -0.55715200 |
| C | -1.67690900 | 2.04544600  | 0.41733100  |
| C | -0.54306700 | 2.56524000  | 1.04814500  |
| C | -2.82252800 | 2.87076500  | 0.27610900  |
| C | -0.51366000 | 3.89566700  | 1.45410900  |
| H | 0.31244800  | 1.92978700  | 1.23764700  |
| C | -2.74952000 | 4.20712300  | 0.68653000  |
| C | -1.60564100 | 4.76075000  | 1.26506600  |
| H | 0.38819700  | 4.25269100  | 1.93729500  |
| H | -3.65370400 | 4.79117300  | 0.54837300  |
| C | 4.74541000  | -0.01798400 | 0.18624000  |
| O | 5.95238500  | 0.12997600  | 0.36821900  |
| C | -4.13954400 | 2.34486900  | -0.19111400 |
| O | -5.11288200 | 3.07334300  | -0.37654400 |
| C | -1.07591000 | -4.01631100 | 0.00107300  |
| C | -0.66181100 | -4.85145400 | 1.04400100  |
| C | -1.84947700 | -4.52770300 | -1.04629500 |
| C | -1.01613300 | -6.20044300 | 1.02998400  |
| H | -0.07996900 | -4.43797400 | 1.86102900  |
| C | -2.21468100 | -5.87382800 | -1.04103200 |
| H | -2.14642800 | -3.87432200 | -1.85992200 |
| C | -1.79619400 | -6.71416500 | -0.00764300 |
| H | -0.69398400 | -6.84640800 | 1.84101000  |
| H | -2.81417000 | -6.26851100 | -1.85572800 |
| H | -2.07610200 | -7.76292800 | -0.01101500 |
| C | 2.63121700  | -3.76110100 | 0.43102600  |
| H | 2.08139600  | -4.69283500 | 0.44690700  |
| C | 4.03261300  | -3.76370900 | 0.56574500  |
| C | 4.72538900  | -2.54058400 | 0.50933100  |
| H | 5.80581300  | -2.50350200 | 0.59691400  |
| C | 4.06448400  | -1.32114300 | 0.32355000  |
| C | -4.16307100 | -1.94917800 | -0.42320400 |
| H | -4.15586300 | -3.03310000 | -0.43530900 |
| C | -5.38510700 | -1.25446400 | -0.56373300 |
| C | -5.38029900 | 0.14653800  | -0.51222400 |
| H | -6.29379900 | 0.72020900  | -0.60350200 |
| C | -4.19543700 | 0.87616300  | -0.32486900 |

---

---

|   |             |             |             |
|---|-------------|-------------|-------------|
| C | 4.46213700  | 4.62821600  | -1.69562900 |
| C | 5.53364200  | 4.29300200  | -2.75996900 |
| H | 6.06147700  | 5.20228000  | -3.06872500 |
| H | 6.27821900  | 3.58873000  | -2.37811500 |
| H | 5.07658300  | 3.84709000  | -3.64938100 |
| C | 5.14791500  | 5.26261100  | -0.46259500 |
| H | 5.67597200  | 6.17876300  | -0.74975300 |
| H | 4.41190000  | 5.52191600  | 0.30561000  |
| H | 5.87767500  | 4.58487100  | -0.01055700 |
| C | 3.49299400  | 5.66456300  | -2.29482400 |
| H | 3.00359100  | 5.29188900  | -3.20075000 |
| H | 2.71553300  | 5.95699000  | -1.58102600 |
| H | 4.04483100  | 6.56908900  | -2.56933800 |
| C | 4.83133400  | -5.06849300 | 0.76309700  |
| C | 5.83414200  | -5.23978500 | -0.40259500 |
| H | 5.31162100  | -5.30039800 | -1.36286500 |
| H | 6.53952200  | -4.40601300 | -0.45862700 |
| H | 6.41521800  | -6.15975500 | -0.27304000 |
| C | 5.60734900  | -4.99747500 | 2.09970300  |
| H | 4.92121500  | -4.88558200 | 2.94570600  |
| H | 6.18820700  | -5.91406800 | 2.25218400  |
| H | 6.30373700  | -4.15458100 | 2.12180300  |
| C | 3.92571300  | -6.31390100 | 0.80123800  |
| H | 3.20595300  | -6.27086800 | 1.62553900  |
| H | 3.37004600  | -6.44534500 | -0.13309700 |
| H | 4.53874700  | -7.20885100 | 0.94726200  |
| C | -1.58998000 | 6.24030600  | 1.68939400  |
| C | -0.23739600 | 6.65857600  | 2.29583600  |
| H | -0.00340600 | 6.09312100  | 3.20391900  |
| H | 0.58677600  | 6.52484000  | 1.58708800  |
| H | -0.26819000 | 7.71814000  | 2.56864600  |
| C | -1.86212100 | 7.12903300  | 0.45273300  |
| H | -2.82946800 | 6.90250100  | -0.00459300 |
| H | -1.86668300 | 8.18713700  | 0.73747300  |
| H | -1.08992800 | 6.98647500  | -0.31050400 |
| C | -2.69255300 | 6.48503600  | 2.74664900  |
| H | -3.68655300 | 6.24363200  | 2.35952100  |
| H | -2.52315600 | 5.87290700  | 3.63850600  |
| H | -2.69996000 | 7.53712800  | 3.05290000  |
| C | -6.68300200 | -2.06508700 | -0.75703500 |
| C | -6.90392200 | -2.98679200 | 0.46588800  |
| H | -7.82211000 | -3.57168800 | 0.34108700  |
| H | -6.07818500 | -3.69154900 | 0.60259000  |
| H | -6.99765100 | -2.40005700 | 1.38535900  |

---

|   |             |             |             |
|---|-------------|-------------|-------------|
| C | -6.56714200 | -2.92902200 | -2.03535900 |
| H | -6.41502200 | -2.30135500 | -2.91940700 |
| H | -5.73224500 | -3.63410100 | -1.97804600 |
| H | -7.48287000 | -3.51162300 | -2.18592400 |
| C | -7.92001000 | -1.15914600 | -0.90360000 |
| H | -8.08146800 | -0.54210600 | -0.01412600 |
| H | -7.83867100 | -0.49467900 | -1.76962400 |
| H | -8.81293400 | -1.77681400 | -1.04317500 |

**2 transition state** opt B3LYP/6-31G(d,p) Imaginary Frequency 1 HF = -2327.084404 hartree

|   |             |             |             |
|---|-------------|-------------|-------------|
| C | 1.78043300  | -1.06953800 | -0.68455800 |
| C | 0.42230600  | -0.70016900 | -0.56839300 |
| C | 0.42394500  | 0.74815600  | -0.50796300 |
| C | 1.77932900  | 1.13333200  | -0.59081700 |
| N | 2.59929100  | 0.03646600  | -0.72128900 |
| C | 1.94178000  | 2.52265600  | -0.28333100 |
| C | 0.62750200  | 2.95132900  | 0.00649500  |
| C | 1.97011700  | -2.44923800 | -0.35041800 |
| C | 0.66963300  | -2.89985700 | -0.05086400 |
| N | -0.28756000 | -1.90580400 | -0.24006100 |
| N | -0.30969600 | 1.94221600  | -0.19717300 |
| C | -1.65658300 | 2.34294100  | -0.22627100 |
| C | -2.63853200 | 1.64196300  | -0.92786800 |
| C | -2.02928200 | 3.56801500  | 0.38393800  |
| C | -3.96601300 | 2.04106900  | -0.89518300 |
| H | -2.33307400 | 0.82732500  | -1.55962900 |
| C | -3.38385300 | 3.93614000  | 0.41788600  |
| C | -4.38747900 | 3.17883300  | -0.17946400 |
| H | -4.68731800 | 1.46072400  | -1.46281800 |
| H | -3.59593300 | 4.87578900  | 0.91373300  |
| C | -1.62986500 | -2.32691400 | -0.24306500 |
| C | -2.64019400 | -1.64106000 | -0.91241300 |
| C | -1.96998600 | -3.56181300 | 0.37499200  |
| C | -3.96555100 | -2.05835600 | -0.84678700 |
| H | -2.36957800 | -0.81534900 | -1.54485000 |
| C | -3.31368600 | -3.94802000 | 0.43819000  |
| C | -4.34867700 | -3.20307800 | -0.13010200 |
| H | -4.70504000 | -1.48005200 | -1.38867000 |
| H | -3.50361100 | -4.89479200 | 0.93370800  |
| C | -1.02893900 | 4.56750300  | 0.84616300  |
| O | -1.34179700 | 5.61171400  | 1.41643800  |
| C | -0.94525300 | -4.54584000 | 0.81833800  |
| O | -1.23186000 | -5.59518100 | 1.39239500  |



---

|   |             |             |             |
|---|-------------|-------------|-------------|
| C | 4.02545600  | 0.01289600  | -0.73824700 |
| C | 4.75111500  | 0.54781500  | 0.33107300  |
| C | 4.68977100  | -0.56897000 | -1.82247000 |
| C | 6.14532500  | 0.51044500  | 0.30372300  |
| H | 4.22293000  | 0.97770800  | 1.17517800  |
| C | 6.08390600  | -0.61703800 | -1.83283500 |
| H | 4.11091200  | -0.97107600 | -2.64753700 |
| C | 6.81398700  | -0.07346800 | -0.77418800 |
| H | 6.70809100  | 0.92460900  | 1.13472600  |
| H | 6.59851400  | -1.06942000 | -2.67497300 |
| H | 7.89896400  | -0.10619300 | -0.78807100 |
| C | 2.98894100  | 3.43758400  | -0.15740800 |
| H | 3.99802400  | 3.12954700  | -0.40516300 |
| C | 2.74756400  | 4.75117900  | 0.29787800  |
| C | 1.43593400  | 5.11764700  | 0.62775300  |
| H | 1.20128600  | 6.10158500  | 1.01366800  |
| C | 0.35769300  | 4.23124300  | 0.48161000  |
| C | 3.04845500  | -3.32894500 | -0.19816500 |
| H | 4.04666700  | -2.98747700 | -0.43807300 |
| C | 2.83904800  | -4.63659400 | 0.27529500  |
| C | 1.52984700  | -5.03403700 | 0.59824900  |
| H | 1.32523000  | -6.02123300 | 0.99839800  |
| C | 0.43034200  | -4.18367600 | 0.43805900  |
| C | -5.87647700 | 3.55982800  | -0.13286000 |
| C | -6.39719700 | 3.80510900  | -1.56888600 |
| H | -7.45935400 | 4.07318000  | -1.54776300 |
| H | -5.85012200 | 4.62262300  | -2.04927300 |
| H | -6.29363500 | 2.91702600  | -2.19995500 |
| C | -6.12005100 | 4.83557100  | 0.69447800  |
| H | -7.19130400 | 5.05944000  | 0.71960100  |
| H | -5.78039100 | 4.72000200  | 1.72858100  |
| H | -5.61133500 | 5.70404900  | 0.26439800  |
| C | -6.67706000 | 2.40317500  | 0.51138500  |
| H | -6.57120500 | 1.47112500  | -0.05270000 |
| H | -6.33750300 | 2.21416800  | 1.53477300  |
| H | -7.74377400 | 2.65092800  | 0.54694200  |
| C | 3.93412800  | 5.72734800  | 0.42600500  |
| C | 4.58574100  | 5.92794000  | -0.96288400 |
| H | 4.95844200  | 4.98713800  | -1.37921400 |
| H | 3.86715800  | 6.34660500  | -1.67480800 |
| H | 5.43362000  | 6.61829800  | -0.89027700 |
| C | 3.49895300  | 7.10649200  | 0.95586900  |
| H | 3.05299800  | 7.03830500  | 1.95315400  |
| H | 4.37100700  | 7.76427200  | 1.02783700  |

---

---

|   |             |             |             |
|---|-------------|-------------|-------------|
| H | 2.77535500  | 7.58863000  | 0.29109100  |
| C | 4.98270900  | 5.14610000  | 1.40405900  |
| H | 4.54944000  | 4.99672400  | 2.39840400  |
| H | 5.37364200  | 4.18349300  | 1.06029400  |
| H | 5.83192100  | 5.83138400  | 1.50338000  |
| C | -5.80788600 | -3.67403800 | -0.00525400 |
| C | -6.79156200 | -2.70612200 | -0.68916500 |
| H | -6.73657000 | -1.69968300 | -0.26041900 |
| H | -6.61046700 | -2.63142500 | -1.76671300 |
| H | -7.81645300 | -3.06592700 | -0.55445000 |
| C | -5.96063700 | -5.06683600 | -0.66099400 |
| H | -5.31316200 | -5.81082200 | -0.18835000 |
| H | -6.99442300 | -5.41889500 | -0.57113400 |
| H | -5.70585500 | -5.02943300 | -1.72523700 |
| C | -6.18398700 | -3.76974400 | 1.49220200  |
| H | -5.53752000 | -4.47081200 | 2.02772600  |
| H | -6.09707900 | -2.79424500 | 1.98171000  |
| H | -7.21767300 | -4.11566900 | 1.60399700  |
| C | 3.99847900  | -5.63473300 | 0.46699500  |
| C | 4.08177600  | -6.04682300 | 1.95593800  |
| H | 4.89630500  | -6.76401600 | 2.10772100  |
| H | 4.27202500  | -5.17677900 | 2.59283900  |
| H | 3.15626700  | -6.51640300 | 2.30074700  |
| C | 5.35926300  | -5.04092400 | 0.05688400  |
| H | 5.37617600  | -4.74889700 | -0.99846200 |
| H | 5.62235600  | -4.16501300 | 0.65896500  |
| H | 6.14520100  | -5.78851000 | 0.20384800  |
| C | 3.74183200  | -6.89143900 | -0.39809700 |
| H | 2.80523100  | -7.38710100 | -0.12775800 |
| H | 3.68743900  | -6.63150800 | -1.46041800 |
| H | 4.55282200  | -7.61658800 | -0.26675300 |

---

**3** opt B3LYP/6-31G(d,p) Imaginary Frequency 0 HF = -2118.154953 hartree

---

|   |             |             |             |
|---|-------------|-------------|-------------|
| C | -1.37757100 | -2.89325900 | -0.12678100 |
| C | -0.70143400 | -1.64425600 | 0.03173400  |
| C | 0.70144200  | -1.64425400 | -0.03170200 |
| C | 1.37758900  | -2.89324900 | 0.12681300  |
| C | 2.79309400  | -2.59545000 | 0.26362100  |
| C | 2.91441600  | -1.21118200 | 0.08605300  |
| C | -2.79307800 | -2.59547400 | -0.26357100 |
| C | -2.91441400 | -1.21121600 | -0.08597300 |
| N | -1.67830000 | -0.62272900 | 0.14546700  |
| N | 1.67829600  | -0.62270700 | -0.14538900 |
| C | 1.66703500  | 0.63395000  | -0.78562200 |

---

---

|   |             |             |             |
|---|-------------|-------------|-------------|
| C | 0.56351200  | 1.11775100  | -1.49385700 |
| C | 2.85324300  | 1.41282200  | -0.75181500 |
| C | 0.60502600  | 2.37678000  | -2.08450900 |
| H | -0.32606500 | 0.51094700  | -1.59713300 |
| C | 2.84978700  | 2.68082800  | -1.34557400 |
| C | 1.73797600  | 3.20462500  | -2.00745500 |
| H | -0.27622600 | 2.70775400  | -2.62124000 |
| H | 3.78260800  | 3.23181300  | -1.28234900 |
| C | -1.66704500 | 0.63394300  | 0.78566600  |
| C | -0.56352100 | 1.11776800  | 1.49388400  |
| C | -2.85325800 | 1.41280600  | 0.75184500  |
| C | -0.60503900 | 2.37681300  | 2.08450300  |
| H | 0.32606200  | 0.51097300  | 1.59716600  |
| C | -2.84980600 | 2.68082800  | 1.34557300  |
| C | -1.73799500 | 3.20464800  | 2.00743500  |
| H | 0.27621600  | 2.70780800  | 2.62121700  |
| H | -3.78263100 | 3.23180500  | 1.28233900  |
| C | 4.14691400  | 0.89603100  | -0.21190500 |
| O | 5.15058500  | 1.59826400  | -0.11046900 |
| C | -4.14692500 | 0.89599900  | 0.21194200  |
| O | -5.15059500 | 1.59822800  | 0.11047800  |
| C | 3.95112400  | -3.34137600 | 0.49883000  |
| H | 3.87340600  | -4.41391300 | 0.63190300  |
| C | 5.20783600  | -2.70864500 | 0.56261600  |
| C | 5.27580900  | -1.31787200 | 0.35508200  |
| H | 6.22640200  | -0.79571200 | 0.37812800  |
| C | 4.13714100  | -0.54709700 | 0.09542700  |
| C | -3.95109800 | -3.34140400 | -0.49883800 |
| H | -3.87335900 | -4.41393400 | -0.63194800 |
| C | -5.20781100 | -2.70868400 | -0.56262400 |
| C | -5.27580100 | -1.31791400 | -0.35504900 |
| H | -6.22640000 | -0.79576500 | -0.37811600 |
| C | -4.13714500 | -0.54713400 | -0.09536700 |
| C | 1.79827500  | 4.60933600  | -2.63353300 |
| C | 2.91864600  | 4.65123500  | -3.69959300 |
| H | 2.97926700  | 5.64875000  | -4.14894700 |
| H | 3.89729300  | 4.41942400  | -3.26974400 |
| H | 2.72519700  | 3.92959900  | -4.49998100 |
| C | 2.10603900  | 5.64676700  | -1.52808600 |
| H | 2.16290400  | 6.65390000  | -1.95583300 |
| H | 1.32310500  | 5.64707200  | -0.76224800 |
| H | 3.05875300  | 5.44058500  | -1.03191100 |
| C | 0.47185300  | 5.00342400  | -3.30984100 |
| H | 0.21615400  | 4.32861300  | -4.13348100 |

---

---

|   |             |             |             |
|---|-------------|-------------|-------------|
| H | -0.36234400 | 5.00988300  | -2.60045500 |
| H | 0.55704400  | 6.01164600  | -3.72726900 |
| C | 6.50783600  | -3.49051000 | 0.84023000  |
| C | 7.47726000  | -3.31929500 | -0.35335200 |
| H | 7.03482700  | -3.70783000 | -1.27646100 |
| H | 7.73447400  | -2.26987700 | -0.52242900 |
| H | 8.40931800  | -3.86454000 | -0.16750700 |
| C | 7.17303000  | -2.93934300 | 2.12382400  |
| H | 6.51192700  | -3.05583000 | 2.98881600  |
| H | 8.10350400  | -3.47917200 | 2.33211200  |
| H | 7.41800400  | -1.87744000 | 2.03169800  |
| C | 6.25613700  | -4.99692900 | 1.04023500  |
| H | 5.59592400  | -5.19195500 | 1.89189400  |
| H | 5.81667300  | -5.46024600 | 0.15056200  |
| H | 7.20548000  | -5.50423500 | 1.23831300  |
| C | -1.79830300 | 4.60936900  | 2.63348900  |
| C | -0.47186500 | 5.00349700  | 3.30974200  |
| H | -0.21612300 | 4.32871000  | 4.13338900  |
| H | 0.36230600  | 5.00995400  | 2.60032500  |
| H | -0.55706000 | 6.01172700  | 3.72715000  |
| C | -2.10613000 | 5.64678100  | 1.52804300  |
| H | -3.05885500 | 5.44057700  | 1.03190100  |
| H | -2.16300300 | 6.65391600  | 1.95578400  |
| H | -1.32322100 | 5.64709900  | 0.76217800  |
| C | -2.91863800 | 4.65125200  | 3.69959100  |
| H | -3.89729300 | 4.41941300  | 3.26977300  |
| H | -2.72514300 | 3.92962700  | 4.49997600  |
| H | -2.97926800 | 5.64877000  | 4.14893900  |
| C | -6.50780700 | -3.49054300 | -0.84027900 |
| C | -7.47728400 | -3.31923100 | 0.35325400  |
| H | -8.40933000 | -3.86449400 | 0.16741000  |
| H | -7.03487900 | -3.70768800 | 1.27640800  |
| H | -7.73449800 | -2.26979600 | 0.52222800  |
| C | -6.25613400 | -4.99698600 | -1.04018400 |
| H | -5.59594400 | -5.19208500 | -1.89184300 |
| H | -5.81665700 | -5.46024600 | -0.15048800 |
| H | -7.20548700 | -5.50429400 | -1.23820900 |
| C | -7.17292800 | -2.93943000 | -2.12392100 |
| H | -7.41785500 | -1.87750600 | -2.03189000 |
| H | -6.51181400 | -3.05601600 | -2.98889200 |
| H | -8.10342700 | -3.47922000 | -2.33219900 |
| C | -0.68685800 | -4.11173700 | -0.09885100 |
| H | -1.23197100 | -5.04539100 | -0.19307400 |
| C | 0.68688600  | -4.11173300 | 0.09889700  |

---

|                                                                                                |             |             |             |
|------------------------------------------------------------------------------------------------|-------------|-------------|-------------|
| H                                                                                              | 1.23200400  | -5.04538300 | 0.19312600  |
| <b>3 transition state opt B3LYP/6-31G(d,p) Imaginary Frequency 1 HF = -2118.105102 hartree</b> |             |             |             |
| C                                                                                              | -1.33058800 | -2.56251500 | -1.25903500 |
| C                                                                                              | -0.69192300 | -1.31459700 | -0.94323800 |
| C                                                                                              | 0.73866300  | -1.30642800 | -0.93624900 |
| C                                                                                              | 1.39477100  | -2.54789800 | -1.23731100 |
| C                                                                                              | 2.73269000  | -2.50307100 | -0.68175000 |
| C                                                                                              | 2.85200400  | -1.24795800 | -0.08231300 |
| C                                                                                              | -2.67686400 | -2.53394900 | -0.72580100 |
| C                                                                                              | -2.81712700 | -1.28695700 | -0.12061600 |
| N                                                                                              | -1.70449600 | -0.48086400 | -0.35284300 |
| N                                                                                              | 1.73510800  | -0.45577500 | -0.34045600 |
| C                                                                                              | 2.00997500  | 0.93257700  | -0.29887800 |
| C                                                                                              | 1.51356500  | 1.84011400  | -1.23571600 |
| C                                                                                              | 3.00071000  | 1.39393500  | 0.60582100  |
| C                                                                                              | 1.84719100  | 3.18763000  | -1.16838600 |
| H                                                                                              | 0.93519400  | 1.46713600  | -2.06666200 |
| C                                                                                              | 3.28828200  | 2.76440800  | 0.67538900  |
| C                                                                                              | 2.70638100  | 3.69917400  | -0.17851100 |
| H                                                                                              | 1.44771500  | 3.84924900  | -1.93113100 |
| H                                                                                              | 4.04630500  | 3.04534100  | 1.39666400  |
| C                                                                                              | -1.99226600 | 0.90539900  | -0.29472300 |
| C                                                                                              | -1.49317600 | 1.83066600  | -1.20666100 |
| C                                                                                              | -2.99916400 | 1.34492400  | 0.60821600  |
| C                                                                                              | -1.83870800 | 3.17903200  | -1.12544900 |
| H                                                                                              | -0.89675800 | 1.47815600  | -2.03289700 |
| C                                                                                              | -3.29869300 | 2.70758400  | 0.69067900  |
| C                                                                                              | -2.71615600 | 3.66459900  | -0.14530000 |
| H                                                                                              | -1.42873600 | 3.85083900  | -1.87057800 |
| H                                                                                              | -4.07074000 | 2.97610100  | 1.40455300  |
| C                                                                                              | 3.95245600  | 0.46532400  | 1.28623200  |
| O                                                                                              | 4.74279100  | 0.82611100  | 2.15374100  |
| C                                                                                              | -3.95090800 | 0.39748500  | 1.26271700  |
| O                                                                                              | -4.75319900 | 0.73664300  | 2.12740100  |
| C                                                                                              | 3.77252900  | -3.41942200 | -0.53020800 |
| H                                                                                              | 3.69937100  | -4.39579300 | -0.99938600 |
| C                                                                                              | 4.90861600  | -3.09611200 | 0.24260200  |
| C                                                                                              | 4.96639900  | -1.83455700 | 0.85504300  |
| H                                                                                              | 5.80473000  | -1.54705900 | 1.47715900  |
| C                                                                                              | 3.94741700  | -0.88449400 | 0.69281700  |
| C                                                                                              | -3.70926600 | -3.46902800 | -0.59704800 |
| H                                                                                              | -3.61250500 | -4.43695000 | -1.07445400 |
| C                                                                                              | -4.85435400 | -3.16488300 | 0.16078000  |

---

|   |             |             |             |
|---|-------------|-------------|-------------|
| C | -4.93175600 | -1.90550900 | 0.78681500  |
| H | -5.78411200 | -1.63966700 | 1.40305100  |
| C | -3.92690900 | -0.94360100 | 0.64864000  |
| C | 3.03766500  | 5.20049700  | -0.12885300 |
| C | 3.72791300  | 5.62153100  | -1.44805900 |
| H | 3.96570700  | 6.69093800  | -1.42902200 |
| H | 4.66118700  | 5.06861700  | -1.59497200 |
| H | 3.09063200  | 5.43956000  | -2.31897000 |
| C | 3.97698200  | 5.54639500  | 1.04168500  |
| H | 4.16084000  | 6.62533400  | 1.05918400  |
| H | 3.54269700  | 5.26698500  | 2.00685200  |
| H | 4.94734400  | 5.04900900  | 0.94813600  |
| C | 1.73164500  | 6.00965300  | 0.04409500  |
| H | 1.03947100  | 5.84190100  | -0.78651300 |
| H | 1.21814800  | 5.73297300  | 0.97059900  |
| H | 1.94926400  | 7.08269600  | 0.08251000  |
| C | 6.03298200  | -4.13964300 | 0.39892400  |
| C | 6.60182800  | -4.49631000 | -0.99492700 |
| H | 5.83582700  | -4.91397400 | -1.65535300 |
| H | 7.01907300  | -3.61106700 | -1.48567200 |
| H | 7.40017800  | -5.24087300 | -0.90131100 |
| C | 7.19206700  | -3.62145200 | 1.27094200  |
| H | 6.86290600  | -3.38083900 | 2.28673800  |
| H | 7.96558900  | -4.39203100 | 1.34878800  |
| H | 7.65757900  | -2.72834200 | 0.84207400  |
| C | 5.46514200  | -5.41640400 | 1.06320900  |
| H | 5.05942900  | -5.19386400 | 2.05530000  |
| H | 4.66429100  | -5.86603900 | 0.46844800  |
| H | 6.25367300  | -6.16828000 | 1.17911900  |
| C | -3.10543500 | 5.14727500  | -0.01241000 |
| C | -2.41885400 | 6.02752700  | -1.07277400 |
| H | -1.32795900 | 5.98399000  | -0.99467500 |
| H | -2.70350200 | 5.73817400  | -2.09004100 |
| H | -2.71622000 | 7.07162400  | -0.93353800 |
| C | -4.63598700 | 5.30253400  | -0.17800400 |
| H | -5.18903500 | 4.74072200  | 0.57964700  |
| H | -4.92161000 | 6.35606900  | -0.08373300 |
| H | -4.96211000 | 4.94918200  | -1.16168400 |
| C | -2.68945700 | 5.65245700  | 1.38926100  |
| H | -3.17534400 | 5.07924900  | 2.18427400  |
| H | -1.60701800 | 5.56902900  | 1.53118600  |
| H | -2.96926100 | 6.70443000  | 1.51477900  |
| C | -6.01280100 | -4.16622800 | 0.34119700  |
| C | -6.18459500 | -4.48967200 | 1.84436500  |

---

---

|   |             |             |             |
|---|-------------|-------------|-------------|
| H | -7.01022200 | -5.19525600 | 1.98972700  |
| H | -5.27540400 | -4.94136800 | 2.25429200  |
| H | -6.40574400 | -3.59395100 | 2.43160100  |
| C | -5.76758100 | -5.48899700 | -0.40890300 |
| H | -5.66276700 | -5.33388100 | -1.48793500 |
| H | -4.87222800 | -6.00500000 | -0.04652900 |
| H | -6.61755500 | -6.16115400 | -0.25511800 |
| C | -7.32013300 | -3.54132100 | -0.20117400 |
| H | -7.57629100 | -2.61552300 | 0.32174700  |
| H | -7.23073900 | -3.30907200 | -1.26747900 |
| H | -8.15635200 | -4.23786800 | -0.07405200 |
| C | -0.64698600 | -3.68501000 | -1.74003400 |
| H | -1.19984700 | -4.58272600 | -1.99716800 |
| C | 0.73121200  | -3.67830400 | -1.72713600 |
| H | 1.29751700  | -4.57069900 | -1.97337400 |

---

**4 opt B3LYP/6-31G(d,p) Imaginary Frequency 0 HF = -2271.797866 hartree**

---

|   |             |             |             |
|---|-------------|-------------|-------------|
| C | -1.40423000 | -2.52548400 | -0.12048200 |
| C | -0.70700700 | -1.30824900 | 0.04956400  |
| C | 0.70686000  | -1.30830000 | -0.04955800 |
| C | 1.40399000  | -2.52559000 | 0.12046000  |
| C | 2.81829800  | -2.18773800 | 0.22439900  |
| C | 2.89624100  | -0.80256600 | 0.00000900  |
| C | -2.81851100 | -2.18752400 | -0.22440100 |
| C | -2.89635500 | -0.80235700 | 0.00002500  |
| N | -1.64096300 | -0.26132300 | 0.22091700  |
| N | 1.64089000  | -0.26143600 | -0.22088300 |
| C | 1.56731300  | 0.98100700  | -0.88677100 |
| C | 0.42721600  | 1.40852400  | -1.57969500 |
| C | 2.72195000  | 1.79988900  | -0.90400100 |
| C | 0.41680700  | 2.64561000  | -2.20749600 |
| H | -0.44369400 | 0.77070400  | -1.64398500 |
| C | 2.66680400  | 3.05191600  | -1.53767700 |
| C | 1.52699500  | 3.51366400  | -2.18917700 |
| H | -0.48637500 | 2.93581600  | -2.73540400 |
| H | 3.58244300  | 3.62999300  | -1.50934400 |
| C | -1.56727700 | 0.98112000  | 0.88679500  |
| C | -0.42709000 | 1.40856200  | 1.57964200  |
| C | -2.72183800 | 1.80008600  | 0.90405300  |
| C | -0.41654900 | 2.64564800  | 2.20741200  |
| H | 0.44376200  | 0.77065400  | 1.64387100  |
| C | -2.66655300 | 3.05213700  | 1.53769100  |
| C | -1.52668100 | 3.51380000  | 2.18911600  |

---

---

|   |             |             |             |
|---|-------------|-------------|-------------|
| H | 0.48667300  | 2.93582700  | 2.73526300  |
| H | -3.58214800 | 3.63028400  | 1.50940000  |
| C | 4.04089900  | 1.34471300  | -0.37493800 |
| O | 5.02061300  | 2.08436100  | -0.30997400 |
| C | -4.04084700 | 1.34500200  | 0.37506600  |
| O | -5.02052400 | 2.08471000  | 0.31020000  |
| C | 4.01999100  | -2.86392800 | 0.48510800  |
| H | 4.01038400  | -3.92574500 | 0.68320100  |
| C | 5.24877000  | -2.17878300 | 0.51150900  |
| C | 5.26316000  | -0.79716000 | 0.24673300  |
| H | 6.19099300  | -0.23533500 | 0.24142200  |
| C | 4.09068700  | -0.08865100 | -0.02724500 |
| C | -4.02026700 | -2.86362600 | -0.48508600 |
| H | -4.01073900 | -3.92543500 | -0.68322600 |
| C | -5.24899300 | -2.17839500 | -0.51142100 |
| C | -5.26327700 | -0.79676700 | -0.24663600 |
| H | -6.19107800 | -0.23488800 | -0.24128900 |
| C | -4.09075100 | -0.08835000 | 0.02733300  |
| C | 1.45257400  | 4.87936400  | -2.89272100 |
| C | 2.76848900  | 5.66860100  | -2.76345200 |
| H | 2.66857500  | 6.63543300  | -3.26690400 |
| H | 3.02454400  | 5.86478500  | -1.71740300 |
| H | 3.60814200  | 5.14043300  | -3.22622100 |
| C | 0.31778900  | 5.71995800  | -2.26104200 |
| H | 0.24285600  | 6.69322600  | -2.75858900 |
| H | -0.65470800 | 5.22629500  | -2.34879800 |
| H | 0.50873700  | 5.89619200  | -1.19743200 |
| C | 1.15769500  | 4.66992400  | -4.39711500 |
| H | 1.94831700  | 4.08075100  | -4.87282100 |
| H | 0.20875300  | 4.15009500  | -4.56000200 |
| H | 1.09808700  | 5.63595700  | -4.91053500 |
| C | 6.58006700  | -2.89683000 | 0.81428800  |
| C | 7.53585000  | -2.73696200 | -0.39191100 |
| H | 7.10537600  | -3.18228500 | -1.29479300 |
| H | 7.74889300  | -1.68609500 | -0.60702900 |
| H | 8.49042200  | -3.23514600 | -0.18911400 |
| C | 7.22828500  | -2.26515100 | 2.06918700  |
| H | 6.57688700  | -2.37232300 | 2.94271300  |
| H | 8.18136200  | -2.75690900 | 2.29366400  |
| H | 7.42858500  | -1.19891600 | 1.93104100  |
| C | 6.39291200  | -4.40265300 | 1.07931800  |
| H | 5.74883600  | -4.58950600 | 1.94512000  |
| H | 5.96693900  | -4.92116400 | 0.21379000  |
| H | 7.36431400  | -4.86098100 | 1.28936300  |

---



---

|   |             |             |             |
|---|-------------|-------------|-------------|
| C | -1.45208000 | 4.87949000  | 2.89267400  |
| C | -1.15752500 | 4.66998300  | 4.39709600  |
| H | -1.94835400 | 4.08096900  | 4.87266700  |
| H | -0.20872800 | 4.14994000  | 4.56015200  |
| H | -1.09780200 | 5.63598900  | 4.91055300  |
| C | -0.31699700 | 5.71984100  | 2.26117500  |
| H | -0.50777800 | 5.89613900  | 1.19755000  |
| H | -0.24194400 | 6.69306600  | 2.75878400  |
| H | 0.65538100  | 5.22597000  | 2.34905700  |
| C | -2.76777300 | 5.66904800  | 2.76311900  |
| H | -3.02352800 | 5.86530000  | 1.71701000  |
| H | -3.60768500 | 5.14110500  | 3.22568700  |
| H | -2.66774700 | 6.63584800  | 3.26661100  |
| C | -6.58032400 | -2.89635400 | -0.81426800 |
| C | -7.53646900 | -2.73584300 | 0.39157800  |
| H | -8.49104200 | -3.23397800 | 0.18866900  |
| H | -7.10634500 | -3.18086200 | 1.29477300  |
| H | -7.74944900 | -1.68486500 | 0.60620600  |
| C | -6.39329600 | -4.40232200 | -1.07854400 |
| H | -5.74902000 | -4.58966900 | -1.94409400 |
| H | -5.96760000 | -4.92045000 | -0.21265400 |
| H | -7.36470000 | -4.86063000 | -1.28862800 |
| C | -7.22806300 | -2.26512500 | -2.06962700 |
| H | -7.42819100 | -1.19878700 | -1.93201000 |
| H | -6.57643600 | -2.37279000 | -2.94292700 |
| H | -8.18116300 | -2.75680400 | -2.29418800 |
| C | -0.71161200 | -3.77883500 | -0.10228500 |
| C | 0.71128100  | -3.77888900 | 0.10223100  |
| C | 1.37952100  | -5.02489700 | 0.20231200  |
| H | 2.45210900  | -5.04298100 | 0.34053900  |
| C | -1.37994200 | -5.02479200 | -0.20239500 |
| H | -2.45253200 | -5.04279600 | -0.34061400 |
| C | -0.69705300 | -6.21853600 | -0.10183400 |
| H | -1.23589600 | -7.15821700 | -0.17650800 |
| C | 0.69654700  | -6.21858900 | 0.10171700  |
| H | 1.23532200  | -7.15831100 | 0.17636400  |

---

**4 transition state opt B3LYP/6-31G(d,p) Imaginary Frequency 1 HF = -2271.750008 hartree**

---

|   |             |             |             |
|---|-------------|-------------|-------------|
| C | -1.05668100 | -2.38293800 | -1.10362900 |
| C | -0.57590300 | -1.06922200 | -0.86782500 |
| C | 0.86104700  | -0.87948500 | -0.85865800 |
| C | 1.66898300  | -2.02321200 | -1.08015100 |
| C | 2.93784800  | -1.81635600 | -0.40964100 |

---

---

|   |             |             |             |
|---|-------------|-------------|-------------|
| C | 2.87020300  | -0.52760600 | 0.13448000  |
| C | -2.34525900 | -2.51565200 | -0.45453100 |
| C | -2.62004100 | -1.26016300 | 0.09510800  |
| N | -1.63735900 | -0.33792300 | -0.24300700 |
| N | 1.68828900  | 0.10681700  | -0.22828600 |
| C | 1.78596500  | 1.51962200  | -0.26210800 |
| C | 1.22957900  | 2.30043300  | -1.27631500 |
| C | 2.65974300  | 2.15107400  | 0.65817200  |
| C | 1.39856400  | 3.68002800  | -1.28340100 |
| H | 0.73329800  | 1.81197500  | -2.10138400 |
| C | 2.78098200  | 3.54765000  | 0.64856400  |
| C | 2.14224500  | 4.35042500  | -0.29472300 |
| H | 0.96087000  | 4.24146700  | -2.10335200 |
| H | 3.45778200  | 3.96248700  | 1.38580200  |
| C | -2.09557500 | 1.00338300  | -0.26508000 |
| C | -1.74981100 | 1.91375100  | -1.25939900 |
| C | -3.11265400 | 1.37705000  | 0.65387800  |
| C | -2.26590100 | 3.20920700  | -1.25526500 |
| H | -1.13438800 | 1.58302200  | -2.08197500 |
| C | -3.58596700 | 2.69178000  | 0.65471100  |
| C | -3.16578100 | 3.64901300  | -0.27379300 |
| H | -1.97141800 | 3.87213800  | -2.06049600 |
| H | -4.35765800 | 2.91355100  | 1.38483500  |
| C | 3.66387400  | 1.38358700  | 1.45502400  |
| O | 4.34787200  | 1.88847100  | 2.34059700  |
| C | -3.89463300 | 0.36565200  | 1.42762600  |
| O | -4.69315500 | 0.66402700  | 2.31040300  |
| C | 4.05333400  | -2.60011900 | -0.09437600 |
| H | 4.12478500  | -3.61254300 | -0.47285800 |
| C | 5.07253100  | -2.10635500 | 0.74634900  |
| C | 4.95184500  | -0.80740700 | 1.26438200  |
| H | 5.70024800  | -0.38991100 | 1.92613400  |
| C | 3.85381300  | 0.00749300  | 0.95825600  |
| C | -3.22455400 | -3.57037500 | -0.16193400 |
| H | -3.02059600 | -4.55887900 | -0.54910100 |
| C | -4.34339600 | -3.36464900 | 0.66326400  |
| C | -4.56793200 | -2.07919200 | 1.19381100  |
| H | -5.40933900 | -1.88287400 | 1.84970800  |
| C | -3.71941900 | -1.00633700 | 0.91222600  |
| C | 2.29853700  | 5.88027800  | -0.33656100 |
| C | 3.01154700  | 6.28966200  | -1.64742000 |
| H | 3.12686500  | 7.37825900  | -1.69433400 |
| H | 4.00759600  | 5.83964300  | -1.70787400 |
| H | 2.44923000  | 5.97757500  | -2.53294400 |

---

---

|   |             |             |             |
|---|-------------|-------------|-------------|
| C | 3.12488100  | 6.40939600  | 0.85061400  |
| H | 3.18441000  | 7.50121000  | 0.79957900  |
| H | 2.67088400  | 6.14524500  | 1.81100100  |
| H | 4.14899000  | 6.02361800  | 0.84045900  |
| C | 0.90276800  | 6.54319300  | -0.28702700 |
| H | 0.28116500  | 6.24196100  | -1.13560800 |
| H | 0.37218500  | 6.27240100  | 0.63154100  |
| H | 0.99710200  | 7.63426100  | -0.31658500 |
| C | 6.27288200  | -3.01575400 | 1.08011800  |
| C | 6.99795600  | -3.41494800 | -0.22699500 |
| H | 6.33930000  | -3.95851300 | -0.91116300 |
| H | 7.37050200  | -2.53061600 | -0.75408300 |
| H | 7.85273600  | -4.06361100 | -0.00549300 |
| C | 7.29378100  | -2.31887600 | 1.99922800  |
| H | 6.85302200  | -2.03959500 | 2.96139100  |
| H | 8.12727900  | -2.99843000 | 2.20331200  |
| H | 7.70845600  | -1.41656500 | 1.53852600  |
| C | 5.77114900  | -4.29090900 | 1.79857100  |
| H | 5.25871400  | -4.03764600 | 2.73216600  |
| H | 5.07303100  | -4.86255000 | 1.17965800  |
| H | 6.61400800  | -4.94782900 | 2.04075100  |
| C | -3.74529700 | 5.07378500  | -0.23010600 |
| C | -3.20533200 | 5.95821400  | -1.36896100 |
| H | -2.11656000 | 6.06150900  | -1.32364700 |
| H | -3.47345100 | 5.56371100  | -2.35487100 |
| H | -3.63391400 | 6.96225300  | -1.29036100 |
| C | -5.28615000 | 5.01292700  | -0.35802500 |
| H | -5.74139100 | 4.43753600  | 0.45272700  |
| H | -5.70874000 | 6.02328100  | -0.32594200 |
| H | -5.58337400 | 4.55050900  | -1.30494600 |
| C | -3.37068300 | 5.72951400  | 1.11986400  |
| H | -3.75850300 | 5.15720500  | 1.96759300  |
| H | -2.28406100 | 5.80006500  | 1.23380200  |
| H | -3.78584100 | 6.74172100  | 1.18059100  |
| C | -5.32129200 | -4.50302000 | 1.01842300  |
| C | -5.33618100 | -4.70917600 | 2.55175800  |
| H | -6.03306300 | -5.51072400 | 2.82104000  |
| H | -4.34251700 | -4.98503700 | 2.91941500  |
| H | -5.64873800 | -3.80512200 | 3.08190300  |
| C | -4.93326600 | -5.83997300 | 0.35925100  |
| H | -4.92939000 | -5.77095400 | -0.73376300 |
| H | -3.94743700 | -6.18706500 | 0.68596800  |
| H | -5.66001000 | -6.60993700 | 0.63658300  |
| C | -6.74281800 | -4.12545200 | 0.53817600  |

---

|   |             |             |             |
|---|-------------|-------------|-------------|
| H | -7.09856500 | -3.20224800 | 1.00431800  |
| H | -6.76471900 | -3.98182200 | -0.54711900 |
| H | -7.45332700 | -4.92062800 | 0.79008600  |
| C | -0.24735400 | -3.41300300 | -1.67930200 |
| C | 1.16470500  | -3.22742100 | -1.66498400 |
| C | -0.77736900 | -4.60307500 | -2.22995500 |
| C | 1.99540800  | -4.23886300 | -2.20114700 |
| C | 0.05638000  | -5.57667000 | -2.74721800 |
| C | 1.45219300  | -5.39340600 | -2.73258500 |
| H | -1.85231900 | -4.72634000 | -2.29397600 |
| H | 3.06675700  | -4.07962500 | -2.24323400 |
| H | 2.10254700  | -6.15023000 | -3.16063700 |
| H | -0.36763700 | -6.47453800 | -3.18652600 |

**Carbo[7]helicene opt B3LYP/6-31G(d,p) Imaginary Frequency 0 HF = -1154.105822 hartree**

|   |             |             |             |
|---|-------------|-------------|-------------|
| C | -1.68543500 | 3.43866500  | -0.85855700 |
| C | -0.47320000 | 2.90719700  | -0.32878000 |
| C | -0.44175700 | 1.59263800  | 0.21142200  |
| C | -1.58481400 | 0.72872500  | -0.03510700 |
| C | -2.82413100 | 1.36244200  | -0.35153400 |
| C | -2.84299600 | 2.72168100  | -0.78024500 |
| C | 0.70138000  | 1.24247300  | 1.04496500  |
| C | -1.58487100 | -0.72860300 | 0.03510800  |
| C | -0.44188300 | -1.59260600 | -0.21142400 |
| C | 0.70128100  | -1.24252800 | -1.04496500 |
| C | -0.47342900 | -2.90716400 | 0.32877500  |
| C | -1.68570500 | -3.43853600 | 0.85855300  |
| C | -2.84321000 | -2.72146100 | 0.78024400  |
| C | -2.82423800 | -1.36222300 | 0.35153500  |
| C | -4.04916400 | -0.64409500 | 0.22316100  |
| C | -4.04911300 | 0.64441100  | -0.22315700 |
| H | -4.97990900 | 1.16611800  | -0.42747500 |
| H | -4.98000100 | -1.16572900 | 0.42747900  |
| H | -1.68191800 | 4.45174700  | -1.25109500 |
| H | -3.79331300 | 3.15977800  | -1.07244100 |
| H | -1.68226800 | -4.45161900 | 1.25108900  |
| H | -3.79356000 | -3.15948300 | 1.07244100  |
| C | 0.70164700  | 3.72393800  | -0.31310000 |
| C | 1.84644900  | 3.30181800  | 0.28950100  |
| C | 1.86038100  | 2.08177200  | 1.03345500  |
| H | 0.65619700  | 4.69470000  | -0.79944900 |
| H | 2.74222600  | 3.91675000  | 0.27707100  |
| C | 1.86021600  | -2.08191800 | -1.03345700 |

|   |             |             |             |
|---|-------------|-------------|-------------|
| C | 0.70135300  | -3.72399700 | 0.31309200  |
| H | 0.65582600  | -4.69475700 | 0.79943900  |
| C | 1.84618800  | -3.30196600 | -0.28950700 |
| H | 2.74191600  | -3.91696900 | -0.27707900 |
| C | 0.69213500  | 0.16754100  | 1.96982500  |
| H | -0.20496500 | -0.42404300 | 2.08699800  |
| C | 2.98610200  | 1.74150600  | 1.82254600  |
| H | 3.86275100  | 2.38235700  | 1.77510700  |
| C | 1.78947000  | -0.12331600 | 2.75614100  |
| C | 2.96351600  | 0.64907100  | 2.66244500  |
| H | 1.73901700  | -0.94927500 | 3.45938300  |
| H | 3.82902600  | 0.40502900  | 3.27127300  |
| C | 0.69212300  | -0.16759100 | -1.96981900 |
| H | -0.20493100 | 0.42406500  | -2.08699000 |
| C | 2.98596600  | -1.74173700 | -1.82254600 |
| C | 2.96346600  | -0.64929700 | -2.66244000 |
| H | 3.82899600  | -0.40532000 | -3.27126600 |
| C | 1.78948100  | 0.12318400  | -2.75613300 |
| H | 1.73909300  | 0.94915000  | -3.45937100 |
| H | 3.86256300  | -2.38265700 | -1.77510900 |

**Carbo[7]helicene transition state** opt B3LYP/6-31G(d,p) Imaginary Frequency 1 HF = -1154.039185 hartree

|   |             |             |             |
|---|-------------|-------------|-------------|
| C | -2.77434500 | 1.37772700  | -0.72889100 |
| C | -1.52001400 | 0.74020200  | -0.45957000 |
| C | -1.52058800 | -0.73912900 | -0.45958300 |
| C | -2.77531900 | -1.37576700 | -0.72901600 |
| C | -0.99634200 | -2.65878900 | 1.00030200  |
| C | -0.99422200 | 2.65951300  | 1.00012500  |
| C | 0.90015600  | -1.71037300 | -0.15485600 |
| C | 1.39528800  | -1.42507100 | -1.44796900 |
| C | 1.78571800  | -2.37442500 | 0.75486100  |
| C | 2.71291000  | -1.66438500 | -1.78734400 |
| H | 0.69706200  | -1.08043100 | -2.20106600 |
| C | 3.15411100  | -2.51037200 | 0.42324700  |
| C | 3.61688100  | -2.15885800 | -0.82901800 |
| H | 3.05166200  | -1.46889800 | -2.80032500 |
| H | 3.82006200  | -2.97460300 | 1.14604000  |
| C | 0.90157900  | 1.70963200  | -0.15498800 |
| C | 1.39665500  | 1.42305300  | -1.44782600 |
| C | 1.78755800  | 2.37369100  | 0.75435900  |
| C | 2.71439500  | 1.66145300  | -1.78736600 |
| H | 0.69830800  | 1.07813900  | -2.20065400 |
| C | 3.15599100  | 2.50886800  | 0.42257600  |

---

|   |             |             |             |
|---|-------------|-------------|-------------|
| C | 3.61858500  | 2.15631400  | -0.82945000 |
| H | 3.05310200  | 1.46482800  | -2.80013900 |
| H | 3.82216100  | 2.97327000  | 1.14505700  |
| C | 1.23932300  | -3.05694900 | 1.88586800  |
| C | 1.24173100  | 3.05679300  | 1.88519000  |
| C | -0.10381300 | -3.27931100 | 1.93480800  |
| C | -0.10129500 | 3.27974600  | 1.93437300  |
| C | -3.82363700 | 0.68122100  | -1.39469700 |
| H | -4.68397500 | 1.24279700  | -1.74779300 |
| C | -3.82409100 | -0.67845300 | -1.39480800 |
| H | -4.68473600 | -1.23938400 | -1.74817700 |
| H | 4.65961400  | -2.31246300 | -1.09068700 |
| H | 1.91122600  | -3.51350700 | 2.60722800  |
| H | 4.66134200  | 2.30944200  | -1.09130300 |
| H | 1.91399300  | 3.51323900  | 2.60628500  |
| C | -0.51855300 | -1.63330900 | 0.14113000  |
| C | -0.51718500 | 1.63362700  | 0.14098800  |
| H | -0.53107400 | -3.94775000 | 2.67763000  |
| H | -0.52817700 | 3.94850300  | 2.67713200  |
| C | -2.32552900 | -3.14994100 | 0.84709800  |
| H | -2.64907300 | -3.99350700 | 1.45010700  |
| C | -3.11780400 | -2.62817700 | -0.13109200 |
| H | -4.09116000 | -3.05535000 | -0.35405800 |
| C | -3.11595000 | 2.63031500  | -0.13087100 |
| H | -4.08902400 | 3.05820500  | -0.35369300 |
| C | -2.32308600 | 3.15152000  | 0.84711300  |
| H | -2.64595300 | 3.99526200  | 1.45025800  |

---

### 13. References

- [S1] C. F. H. Allen and G. H. W. McKee, Acridone, *Org. Synth.*, **1943**, 2, 15-17.
- [S2] K. Yamamoto and S. Higashibayashi, Synthesis of three-dimensional butterfly slit-cyclobisazaanthracenes and hydrazinobisanthenes through one-step cyclodimerization and their properties, *Chem. Eur. J.*, **2016**, 22, 663-671.
- [S3] S. Ma, J. Gu, C. Lin, Z. Luo, Y. Zhu, J. Wang, Supertwistacene: a helical graphene nanoribbon, *J. Am. Chem. Soc.*, **2020**, 142, 16887-16893.
- [S4] M. J. Frisch, G. W. Trucks, H. B. Schlegel, G. E. Scuseria, M. A. Robb, J. R. Cheeseman, G. Scalmani, V. Barone, G. A. Petersson, H. Nakatsuji, X. Li, M. Caricato, A. V. Marenich, J. Bloino, B. G. Janesko, R. Gomperts, B. Mennucci, H. P. Hratchian, J. V. Ortiz, A. F. Izmaylov, J. L. Sonnenberg, D. Williams-Young, F. Ding, F. Lipparini, F. Egidi, J. Goings, B. Peng, A. Petrone, T. Henderson, D. Ranasinghe, V. G. Zakrzewski, J. Gao, N. Rega, G. Zheng, W. Liang, M. Hada, M. Ehara, K. Toyota, R. Fukuda, J. Hasegawa, M. Ishida, T. Nakajima, Y. Honda, O. Kitao, H. Nakai, T. Vreven, K. Throssell, J. A. Montgomery, Jr., J. E. Peralta, F. Ogliaro, M. J. Bearpark, J. J. Heyd, E. N. Brothers, K. N. Kudin, V. N. Staroverov, T. A. Keith, R. Kobayashi, J. Normand, K. Raghavachari, A. P. Rendell, J. C. Burant, S. S. Iyengar, J. Tomasi, M. Cossi, J. M. Millam, M. Klene, C. Adamo, R. Cammi, J. W. Ochterski, R. L. Martin, K. Morokuma, O. Farkas, J. B. Foresman, and D. J. Fox, *Gaussian 16, Revision A.03*, Gaussian, Inc., Wallingford CT, **2016**.
